# Supplementary material for: Evolutionary Histories of Transposable Elements in the Genome of the Largest Living Marsupial Carnivore, the Tasmanian Devil
Source: PubMed Central journal article supplement — Mol Biol Evol. 2015 Jan 28;32(5):1268–83. doi: 10.1093/molbev/msv017 (PMC4408412; doi:10.1093/molbev/msv017), 2015-01-28
Supplement: supp_msv017_GallusEtAlSupplemental_InformationRevision.pdf [file supp_msv017_GallusEtAlSupplemental_InformationRevision.pdf]

# **Evolutionary histories of transposable elements in the genome of the largest living marsupial carnivore, the Tasmanian devil**

Gallus, S; Hallström, BM; Kumar, V; Dodt, WG; Janke, A; Schumann, GG; Nilsson, MA.

## **Supplementary information**

**Supplementary Table 1.** Genomic location of L1-1\_SH copies longer than 6,000 nt.

**Supplementary Table 2.** Presence-absence table for the phylogenetic screen in Dasyuromophia.

**Supplementary Table 3.** ERV1 poly(A) element characteristics.

**Supplementary Table 4.** DNA transposons in the Tasmanian devil genome.

**Supplementary Table 5.** Scientific and common names of the investigated marsupial species.

**Supplementary Table 6.** Primers for the phylogenetic retrotransposon marker screening.

**Supplementary Table 7.** OC-1 and hAT-1\_MEu transposon primers.

**Supplementary Figure 1.** L1 length graphs of RTE and L1 in opossum and Tasmanian devil.

**Supplementary Figure 2.** Conservation plots of ORF2 in opossum and Tasmanian devil.

**Supplementary Figure 3.** Screen for identical SINE screen in opossum and Tasmanian devil.

**Supplementary Figure 4.** RT-PCR of the OC1\_Das DNA transposon in dunnart.

**Supplementary Figure 5.** Phylogenetic tree of OC1\_transposase ORFs from different mammals.

**Supplementary Figure 6.** Genomic PCR of OC1\_Das and hAT-1\_MEu DNA transposons.

**Supplementary Figure 7.** Phylogenetic tree of the 17 individual full-length L1 copies.

**Supplementary dataset 1.** Fasta sequences of the phylogenetic retrotransposons used for the evolutionary analysis.

**Supplementary dataset 2.** Fasta sequences of the consensus sequences of the ERV1 element.

**Supplementary Table 1.** Characteristics of L1-1\_SH copies longer than 6,000 nt with intact 5' and 3' UTRs and no nested integrations of transposable elements.

| Scaffold | Chr | Location                             | TSD                                 | Size (nt) |
|----------|-----|--------------------------------------|-------------------------------------|-----------|
| GL835730 | 1   | chr1_GL835730_random:4900-11929      | AAAAAT/AAAAAT                       | 6,642     |
| GL835482 | 1   | chr1_GL835482_random:18539-25398     | GATCAGT/ GATCAGT                    | 6,860     |
| GL841388 | 2   | chr2_GL841388_random:525,411-532,547 | TATCTA/TATCTA                       | 6,739     |
| GL842553 | 2   | chr2_GL842553_random:c12580-5862     | AAGATGTTATTACAG/<br>AAGATGTTATTACAG | 6,719     |
| GL841234 | 2   | chr2_GL841234_random:c698412-691981  | 3'UTR N                             | 6,432     |
| GL841955 | 2   | chr2_GL841955_random:19706-26707     | ATAAAACAA/ATAAAATAA                 | 6,606     |
| GL841930 | 2   | chr2_GL841930_random:72123-78892     | CCCAGA/CCCAA                        | 6,770     |
| GL841199 | 2   | chr2_GL841199_random:c968408-962018  | ACATTTAAGGA/ATATTTAAGGA             | 6,391     |
| GL849815 | 3   | chr3_GL849815_random:94666-101246    | AAAGAATCCATT/AAAGAACCC<br>ATT       | 6,581     |
| GL857653 | 4   | chr4_GL857653_random:27886-34843     | AAAAGCAACAATA/AAAAGCAA<br>CAATA     | 6,574     |
| GL857349 | 4   | chr4_GL857349_random:8002-14653      | TCATTTA/ TCATTTA                    | 6,652     |
| GL859690 | 4   | chr4_GL859690_random:c8386-1489      | -/-                                 | 6,898     |
| GL860397 | 4   | chr4_GL860397_random:c9175-2429      | AAGAAAAAA/AAGAAAAGA                 | 6,747     |
| GL861587 | 5   | chr5_GL861587_random:c196766-190082  | GATAATTT/GATAATTT                   | 6,685     |
| GL861677 | 5   | chr5_GL861677_random:805749-812510   | AGACATGAATATGG/AGACATG<br>AATTGG    | 6,762     |
| GL861642 | 5   | chr5_GL861642_random:c234073-227515  | TCAGTCA/TCTGTCA                     | 6,559     |
| GL865003 | 6   | chr6_GL865003_random:c139531-132898  | AAGAACATAAAGAT/<br>AAGAACATAAAGAT   | 6,667     |

Chr: chromosome, TSD; target site duplications. -/-:not found.

**Supplementary Table 2.** Presence absence table of phylogenetically informative retrotransposon insertions for Dasyuromorphia.

|       | 12<br>WS | 20a<br>WAL | 20b<br>WAL | 100b<br>L1 | 29<br>WS<br>Δ | 6<br>WS | 5<br>WS | 100c<br>L1 | 7<br>WS | 15<br>WS | 16<br>WS | 19<br>WS | 8<br>WS | 97<br>L1 | 44<br>WS | 30a<br>WS | 81<br>L1 | 87<br>L1 | 30b<br>ERV | 83<br>L1 | 95<br>L1<br>Δ | 100a<br>L1 |
|-------|----------|------------|------------|------------|---------------|---------|---------|------------|---------|----------|----------|----------|---------|----------|----------|-----------|----------|----------|------------|----------|---------------|------------|
| ShaDB | +        | +          | +          | +          | +             | +       | +       | +          | +       | +        | +        | +        | +       | +        | +        | +         | +        | +        | +          | +        | +             | +          |
| Sha*  | ?        | +          | +          | +          | +             | +       | +       | +          | +       | ?        | ?        | +        | ?       | ?        | ?        | +         | ?        | ?        | +          | +        | +             | +          |
| Dge   | +        | ?          | ?          | +          | +             | +       | +       | +          | +       | +        | +        | +        | +       | +        | +        | +         | +        | +        | +          | +        | -             | -          |
| Pap   | ?        | ?          | ?          | +          | +             | +       | +       | +          | +       | +        | ?        | +        | ?       | +        | ?        | +         | +        | +        | +          | +        | -             | -          |
| Pta   | ?        | ?          | ?          | ?          | ?             | ?       | ?       | ?          | ?       | ?        | ?        | ?        | ?       | ?        | ?        | +         | D        | ?        | +          | ?        | ?             | ?          |
| Afl   | ?        | ?          | ?          | ?          | +             | +       | +       | ?          | +       | +        | ?        | +        | ?       | +        | ?        | +         | +        | +        | -          | -        | -             | ?          |
| Pin   | ?        | ?          | ?          | ?          | ?             | ?       | ?       | ?          | +       | ?        | ?        | ?        | ?       | ?        | +        | +         | ?        | ?        | -          | ?        | ?             | ?          |
| Scr   | ?        | +          | +          | +          | +             | +       | +       | +          | +       | +        | +        | +        | +       | +        | +        | +         | -        | -        | -          | -        | -             | -          |
| Mfa   | +        | +          | +          | +          | +             | +       | -       | -          | -       | -        | -        | -        | -       | -        | -        | -         | -        | -        | -          | -        | -             | -          |
| Pgu   | ?        | -          | -          | -          | -             | ?       | ?       | -          | ?       | -        | -        | ?        | ?       | -        | -        | -         | ?        | ?        | -          | ?        | -             | -          |
| Iob   | -        | ?          | ?          | ?          | -             | -       | -       | ?          | -       | -        | -        | -        | -       | -        | -        | ?         | ?        | -        | ?          | ?        | ?             | ?          |
| Mla   | ?        | ?          | ?          | ?          | ?             | ?       | ?       | ?          | ?       | +        | ?        | ?        | ?       | ?        | ?        | ?         | ?        | ?        | ?          | ?        | ?             | ?          |
| Nty   | ?        | -          | -          | -          | -             | -       | ?       | -          | ?       | ?        | ?        | ?        | ?       | ?        | ?        | ?         | ?        | ?        | ?          | ?        | ?             | -          |
| Meu   | ?        | -          | -          | -          | ?             | -       | -       | -          | -       | -        | -        | -        | -       | ?        | ?        | -         | -        | -        | -          | -        | -             | -          |
| Mdo   | -        | -          | -          | -          | ?             | ?       | -       | -          | ?       | -        | -        | ?        | -       | ?        | ?        | -         | -        | ?        | -          | -        | -             | -          |

For each locus (indicated by the number in the top row) selected species (three letter code is explained below) were tested for presence (+) or absence (-) of a specific element (**WS** = *WSINE1*, **L1** = *LINE1-1-SH*, **WAL** = *WALLSIIa*, **ERV** = *New ERV Element*). The addition “a”, “b” and “c” to the locus number indicate elements from a locus containing two or more informative insertions. The “?” indicates lack of sequence information for this locus, as in this case the species was tested for amplicon size but not sequenced. A “Δ” marks a large indel and “D” stands for deletion of the element and part of the genomic flank sequence. Sequences for the *Sarcophilus harrisii* genome individual (ShaDB) were directly taken from the database. For some loci an individual (Sha\*) from Copenhagen zoo was sequenced to verify the genome sequence. The background colors highlight the phylogenetic grouping the marker supports.

**Sha** – *Sarcophilus harrisii* (DB=database; \*Copenhagen zoo), **Dge** – *Dasyurus geoffroii*, **Pap** – *Parantechinus apicalis*, **Afl** – *Antechinus flavipes*, **Scr** – *Sminthopsis crassicaudata*, **Mfa** – *Myrmecobius fasciatus*, **Pgu** – *Perameles gunnii*, **Iob** – *Isoodon obesulus*, **Mla** – *Macrotis lagotis*, **Nty** – *Notoryctes typhlops*, **Meu** – *Macropus eugenii*, **Mdo** – *Monodelphis domestica*.

**Supplementary Table 3.** Descriptive information of the 5 copies of a poly(A)tail ERV1 element as well as its fasta sequence in the Tasmanian devil genome.

|                                                                                                                                                                                                                                                                                                                                                                    |                                          |        |         |              |
|--------------------------------------------------------------------------------------------------------------------------------------------------------------------------------------------------------------------------------------------------------------------------------------------------------------------------------------------------------------------|------------------------------------------|--------|---------|--------------|
| 1                                                                                                                                                                                                                                                                                                                                                                  | Chr1 GL834777                            | 188 nt | forward | CNOT1 intron |
|                                                                                                                                                                                                                                                                                                                                                                    | poly(A)tail: AAAAAAAAAAAAAAAAAACAAAAA    |        |         | 24 nt        |
|                                                                                                                                                                                                                                                                                                                                                                    | TSD: ATGTAA/ACGTAA                       |        |         | 6 nt         |
| >1-chr1GL834777                                                                                                                                                                                                                                                                                                                                                    |                                          |        |         |              |
| ATGTAA GCAGAGGTTCCAAACATGCCAGCCTTGCTCCTGGCATGCCAGGACCCCTCTGTCCACTGGAACCCCTGTTCCGGTGCCTTCTTATCTCTATCTTCACCTATTTCCCTAACTATACTTTAAACTTACTTCCAAACCCATAATAAACCTCTTTTATATCAATCTTAAAAAAAAAAAAAAAAACAAAAA <b>ACGTAA</b>                                                                                                                                                    |                                          |        |         |              |
| 2                                                                                                                                                                                                                                                                                                                                                                  | Chr2 GL844869                            | 335 nt | reverse | intergenic   |
|                                                                                                                                                                                                                                                                                                                                                                    | poly(A)tail: AAAAAAAAAAAAAAAAAAAAAAC     |        |         | 23 nt        |
|                                                                                                                                                                                                                                                                                                                                                                    | TSD: AGGACCT/ AGGACTT                    |        |         | 7 nt         |
| >2-chr2GL844869                                                                                                                                                                                                                                                                                                                                                    |                                          |        |         |              |
| AGGACCTTTTGATTACAAAATCCTGGAACCTTTGAATTCCAATAGAAGATCAGGACCTGTCCCAGCCCCACCCG GATCTGAGCCAGCTTGGGACTCCACCCACAGGCCTCTCTAGTTAGATCTCCATTTTAAAAGGCCAAGCTGGTAC CCCCTTTGCAGAGGTCCAAACATGCCAGCCTTATGCCTGGCATCCAGGACCTTCTGTCCGCTGGAATTGTGTC TGGTGCCCTTCTTATCTCTACCTTTACCTATTTCCCTAACTATACTTAACTTACTTCCAAACCCATAATAAACCT CTTTATCAATCTTAAAAAAAAAAAAAAAAAAAAAC <b>AGGACTT</b>     |                                          |        |         |              |
| 3                                                                                                                                                                                                                                                                                                                                                                  | Chr4 GL856963                            | 332 nt | reverse | intergenic   |
|                                                                                                                                                                                                                                                                                                                                                                    | poly(A)tail: AAAACAAAACAAAAAACCAAACAAAAA |        |         | 33 nt        |
|                                                                                                                                                                                                                                                                                                                                                                    | TSD: GAGATGATTCA/ GAGATGATTCA            |        |         | 11 nt        |
| >3-chr4GL856963                                                                                                                                                                                                                                                                                                                                                    |                                          |        |         |              |
| GAGATGATTCA CCTAGTCCCTTTGAATTCCAATAGAAGATCCGGACCTGTCCCAGCCCCACCCAGATCTGAGC CAGCTTAGGGCTACACCCATAGGCCCTTCTAGCTACATCTCCATTATAAAAAGGGGCCAAGTTGGGACCTCCTCT TGCAGAAGTCCAAACATGCCAGCCTTATACCTGGCATGTCAGGACCCCTGTCCACTGGAACCTTTGTCCAGTGC CCTTCTTATCTCTACCTTTACCTATTTTCTTAACTATACTTAACTTACTTCCAAACCCATAATAAACCTCTTTA TCAACCTAAAACAAAACAAAAAACCAAACAAAAA <b>GAGATGATTCA</b> |                                          |        |         |              |
| 4                                                                                                                                                                                                                                                                                                                                                                  | Chr1 GL835600                            | 169 nt | reverse | intergenic   |
|                                                                                                                                                                                                                                                                                                                                                                    | poly(A)tail: AAAAAAGAAAGAAAGAAAGAAA      |        |         | 22 nt        |
|                                                                                                                                                                                                                                                                                                                                                                    | TSD: AGAACTGCATGGA/ AGAACTGCATGGA        |        |         | 13 nt        |
| >4-chr1GL835600                                                                                                                                                                                                                                                                                                                                                    |                                          |        |         |              |
| AGAACTGCATGGA CAGAGGGTCGAAACATGCTACACCCCAAGGACCCCTGTCCACTGGAATCCTGTTTCCA GTATCCTTTATTCTACCTTCACCTATTTCTTAACTATACTTTAACTTACTTCCAAACCCATAATAAACCTCTT TTATCAATCTAAAAAGAAAGAAAGAAAGAAA <b>AGAACTGCATGGA</b>                                                                                                                                                            |                                          |        |         |              |
| 5                                                                                                                                                                                                                                                                                                                                                                  | Chr4 GL856888                            | 197 nt | forward | intergenic   |
|                                                                                                                                                                                                                                                                                                                                                                    | poly(A)tail: AAAAAAAAAAAAAAAAAAGAAAAAAAA |        |         | 24 nt        |
|                                                                                                                                                                                                                                                                                                                                                                    | TSD: AAGAAATGACCAGCAGG/AAGAAATGACCAGCAGG |        |         | 17 nt        |
| >5-chr4GL856888                                                                                                                                                                                                                                                                                                                                                    |                                          |        |         |              |
| AAGAAATGACCAGCAGG GGACCCTCTTTGCAGAGGTTCCAAACATGCCAGCCTTATGCCTGGCATGCCA GGACCCTCTGTCCACTGGAACCCCTGTTCCAGTGTCTTCTTATCTCTACCTTCACCTATTTCTTAACTATACTTTA ACCTTACTTCCAAACCCATAATAAACCTCTTTTTCAATCTAAAAAAAAAAAAAAAAAGAAAAAAAA <b>AAGAAATG ACCAGCAGG</b>                                                                                                                   |                                          |        |         |              |

Target site duplications are indicated in red.

**Supplementary Table 4.** DNA transposons longer than 1,500 nt in the Tasmanian devil genome.

| Name                     | >1,500 nt | Total copy number/genome |
|--------------------------|-----------|--------------------------|
| OC1_Das/hAT-2            | 132       | 5,100                    |
| hAT-1_MEu                | 34        | 31,283                   |
| Mariner3_MD/MarsTigger8  | 10        | 1,540                    |
| Mariner1_MD/ MarsTigger6 | 1         | 5,921                    |
| Charlie1                 | 1         | 1,882                    |
| Charlie1b_Mars           | 15        | 2,372                    |
| Charlie24                | 5         | 159                      |

When the element name in RepBase and Repeatmasker is different, both names are given.

**Supplementary Table 5.** Scientific and common names of the investigated species.

| Common name              | Scientific name                  | Order            | Abbreviation |
|--------------------------|----------------------------------|------------------|--------------|
| Tasmanian devil          | <i>Sarcophilus harrisii</i>      | Dasyuromorphia   | Sha          |
| Western quoll            | <i>Dasyurus geoffroii</i>        | Dasyuromorphia   | Dge          |
| Dibbler                  | <i>Parantechinus apicalis</i>    | Dasyuromorphia   | Pap          |
| Mardo                    | <i>Antechinus flavipes</i>       | Dasyuromorphia   | Afl          |
| Brush-tailed phascogale  | <i>Phascogale tapoatafa</i>      | Dasyuromorphia   | Pta          |
| Fat-tailed dunnart       | <i>Sminthopsis crassicaudata</i> | Dasyuromorphia   | Scr          |
| Planigale                | <i>Planigale sp.</i>             | Dasyuromorphia   | Pin          |
| Numbat                   | <i>Myrmecobius fasciatus</i>     | Dasyuromorphia   | Mfa          |
| Eastern barred bandicoot | <i>Perameles gunnii</i>          | Peramelemorphia  | Pgu          |
| Southern brown bandicoot | <i>Isodon obesulus</i>           | Peramelemorphia  | Iso          |
| Greater bilby            | <i>Macrotis lagotis</i>          | Peramelemorphia  | Mla          |
| Marsupial mole           | <i>Notoryctes typhlops</i>       | Notoryctemorphia | Nty          |
| Tammar wallaby           | <i>Macropus eugenii</i>          | Diprotodontia    | Meu          |
| Wallaroo                 | <i>Macropus robustus</i>         | Diprotodontia    | Mro          |
| Honey possum             | <i>Tarsipes rostratus</i>        | Diprotodontia    | Tro          |
| Common ringtail possum   | <i>Pseudocheirus peregrinus</i>  | Diprotodontia    | Ppe          |
| Common brushtail possum  | <i>Trichosurus vulpecula</i>     | Diprotodontia    | Tvu          |
| Wombat                   | <i>Vombatus ursinus</i>          | Diprotodontia    | Vur          |
| North American opossum   | <i>Didelphis virginiana</i>      | Didelphimorphia  | Dvi          |
| South American opossum   | <i>Monodelphis domestica</i>     | Didelphimorphia  | Mdo          |

**Supplementary Table 6.** Primer sequences for the amplification of the phylogenetic retrotransposon markers.

| Marker | Forward                  | Reverse                 | Length | Gene/Chr.                 |
|--------|--------------------------|-------------------------|--------|---------------------------|
| 05     | CTCACCTGTCTACAACCG       | GGARTGGGTAGTCATAAAGGCC  | 812    | chr1_GL834472<br>FURIN    |
| 06     | GGCCAAGTTTCTGCAGGAAGC    | CACCAGTCCATGACGATGTAG   | 860    | chr1_GL834472<br>FES      |
| 07     | GGGGGCATGAAACACAACAC     | CCCTCAGCAAATGGTTCCAC    | 920    | chr1_GL834506<br>SLC12A6  |
| 08     | CAACTGCAGACTGGTGCC       | GGTCAAAGTCATCTTTCAGGC   | 666    | chr1_GL834508<br>THBS1    |
| 12     | CTTGCAATCCTGGACCATCCC    | CCCAAAATTCGAGGACATGATGG | 862    | chr1_GL834593<br>DICER1   |
| 15     | GAAGCACAAGGTCAGCAGG      | GCCTCAACCGCTGTTGTTC     | 735    | chr1_GL834651<br>GLE1     |
| 16     | GGCACAGAGAGGGCATCC       | CCAAGGCTGGAGCTGAAG      | 713    | chr1_GL834652<br>Novel    |
| 19     | CTGCTGCTGGCTTACCCC       | CACCAAACCGCTGAGC        | 573    | chr1_GL834713<br>ATP6V1B2 |
| 20     | CTGACTAATGAGCAGGTATGGCAG | CCACCTACTCGAACAAATGCTGG | 927    | chr1_GL834670<br>ZNF1     |
| 29     | CAGCCTCTGGAGAACATGC      | GAGGACTTGCAAAATGATGCAC  | 733    | chr1_GL834769<br>CDK10    |
| 30     | GTGGAATCAGCAAACCTATGC    | CCAGCAGCACTCGTAAAGTACCC | 700    | chr1_GL834777<br>CNOT1    |
| 44     | GATTCCAGAAATCACTGC       | TTCCGTTTCTTCCTATG       | 642    | chr2_GL841447 SRRD        |
| 81     | GACTAAAGTTTTTGCTACCAAGG  | GTCCAGAGCAGCAAGACAGG    | 1,042  | chr1_GL834508<br>CASC5    |
| 83     | GGACGTGGCATGTGCATG       | GTATCCAGGGTGGGTCACC     | 1,092  | chr1_GL834625<br>TBC1D9B  |
| 85     | CGACAGTGCATTAGCTGGACC    | GAAACCAACAATCAGGTGCAAA  | 1,508  | chr2_GL841614<br>ADCY1    |
| 87     | GCACCATCCACTGCCTCC       | GTCCTGGACGTCGTCTCC      | 1,014  | chr3_GL849766<br>RTN2     |
| 95     | GATCACATGCCTGAAGG        | CAGATTCTTCATGATCAGC     | 1,105  | chr1_GL834643<br>RHPN2    |
| 97     | GGCAGTGCAAAGATCTGAGTCA   | GAGCCAGAGAGATTCATCTGAGG | 1,031  | chr1_GL834650<br>NLRC5    |
| 100    | GGCCACAGGAGCACTCC        | GGGGCATACAGTTTCAAAT     | 780    | chr1_GL834659<br>Novel    |

The length of the amplification product in Tasmanian devil together with the gene and chromosome location of the marker are indicated.

**Supplementary Table 7.** Primers for amplification of the DNA transposons OC1\_Das and hAT-1\_MEu.

| Primer name | Sequence                          | Position |
|-------------|-----------------------------------|----------|
| OC1ShaF     | ATGATGTCAAGAAAAAGAAAAATTGACT<br>C | 601      |
| OC1ShaF2    | GTGGAGGGAGAATTTGTTAAAGAATG        | 944      |
| OC1ShaR     | GCCTGCTTTTGGCTAATGAGATG           | 2,381    |
| OC1ShaR2    | CTCAGACAGAAATTCCTAAAATTGTCTG      | 1,569    |
| hATMEuF1    | GCCAAACTTCATTACAAATT              | 1,871    |
| hATMEuF2    | GGCCATTTTCAGAAATTGTTGGAAATTC      | 390      |
| hATMEuR1    | GTATCAAATTAGTATATCTTTGGA          | 2,359    |
| hATMEuR2    | CAGAGGTAAGGTGGCTCTCAA             | 1,001    |

The position refers to the consensus-sequences of OC1 and hAT-1\_MEu.



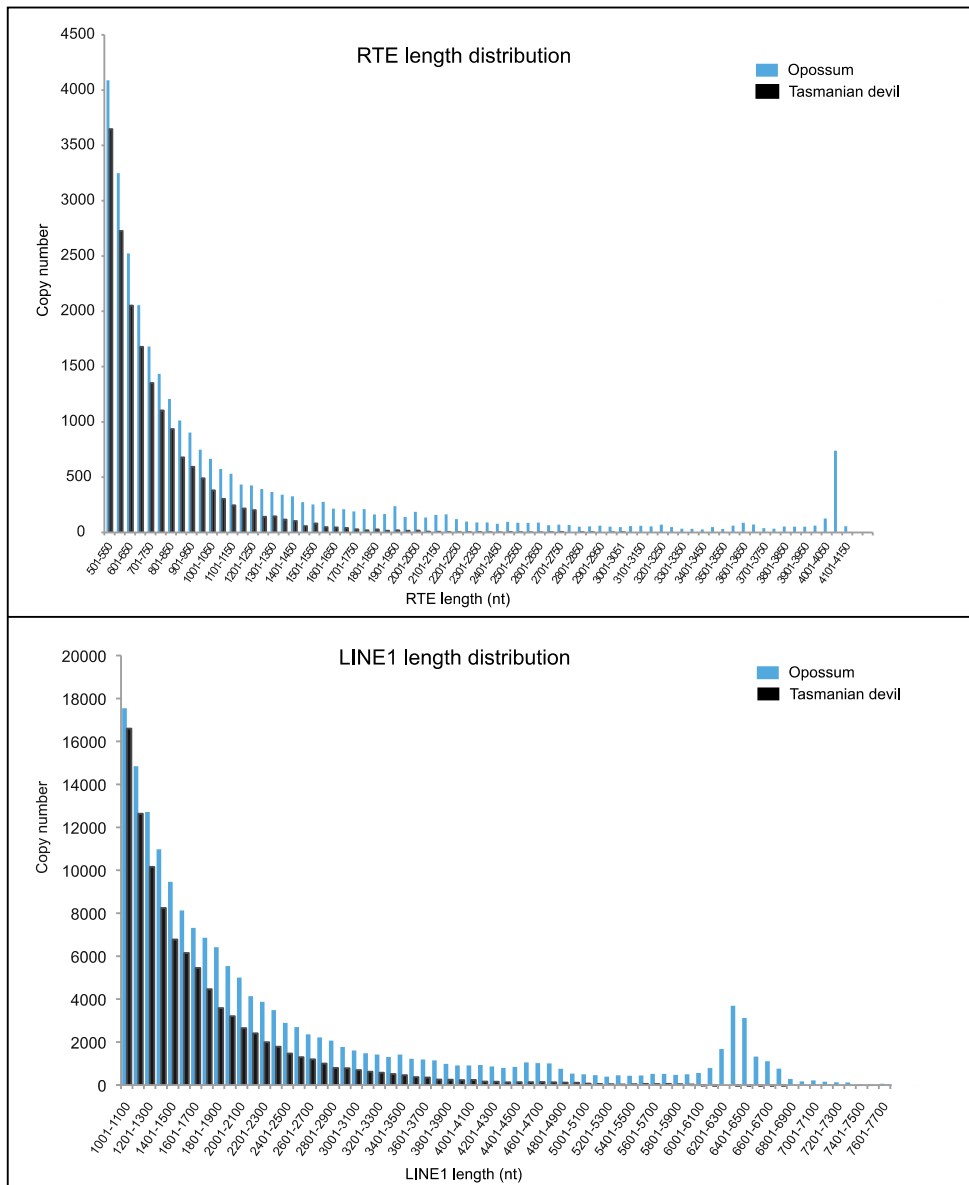

**Supplementary Figure 1.** RTE and LINE1 length distributions plotted against copy number in the opossum (blue bars) and Tasmanian devil (black bars) genomes. The majority of the RTEs and LINE1s are short, 5' truncated copies. The peaks for opossum around 4,000 nt and 6,400 nt indicate the full length RTE and LINE1 elements. The 17 LINE1 copies in the Tasmanian devil genome that exceed 6,000 nt are not visible due to the scale. In the opossum genome, 735 RTE copies were 4,050 nt long, corresponding to RTE\_Mdo (4,088 nt) (Rebase ID RTE-1\_MD), while only three were longer than 3,000 nt in the Tasmanian devil genome. The retrotranspositionally active L1-1\_MD (opossum), which has a consensus sequence length of 6,356 nt (Gentles and Jurka 2005), represents the main peak at 6,300-6,400 nt, with a total of 6,815 copies.

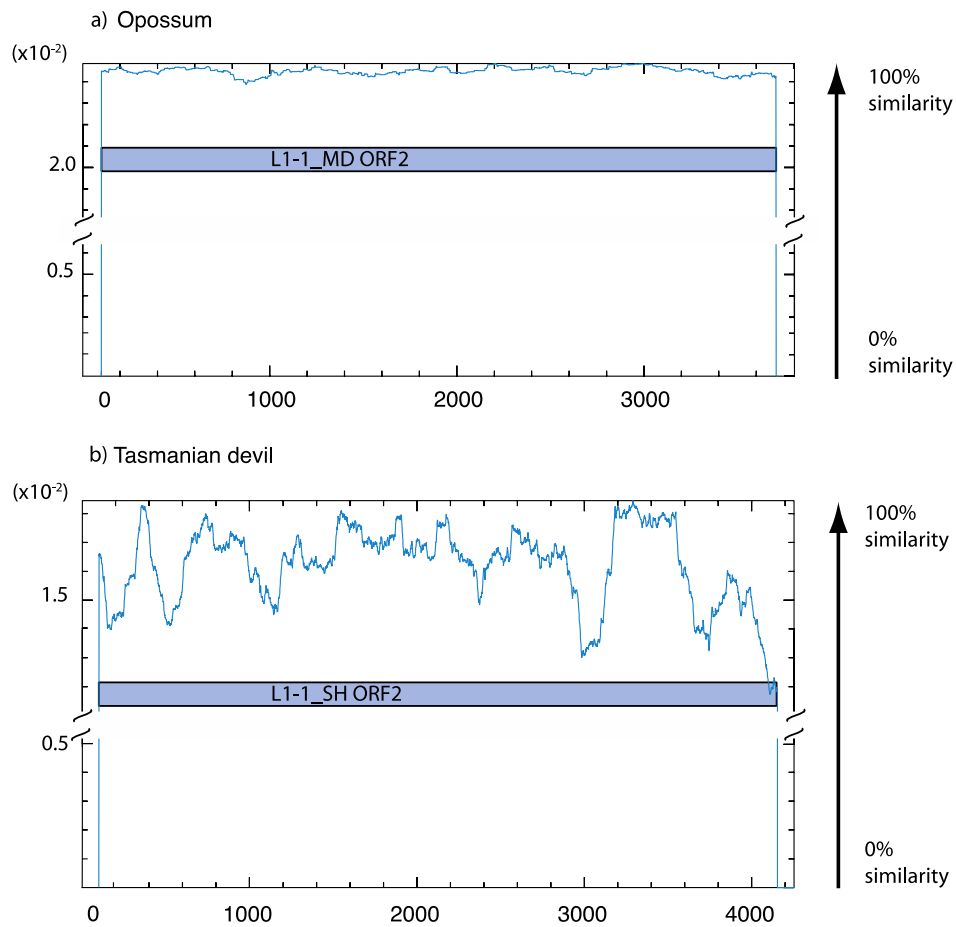

**Supplementary Figure 2.** Conservation plots for a) opossum L1-1\_MD ORF2 and b) Tasmanian devil L1-1\_SH ORF2 from the EMBOSS program PlotCon. At the X-axis the position in the alignment is shown while the Y-axis shows the similarity at each position in the alignment using an average similarity score. The average similarity score is calculated for each position as the average of all the possible pairwise scores of the nucleotide at that position. The program calculates a specified similarity matrix to use for gathering the pairwise scores. The blue lines indicate the amounts of variation found in the respective alignments. The greater deviation from the top line the higher the variation.

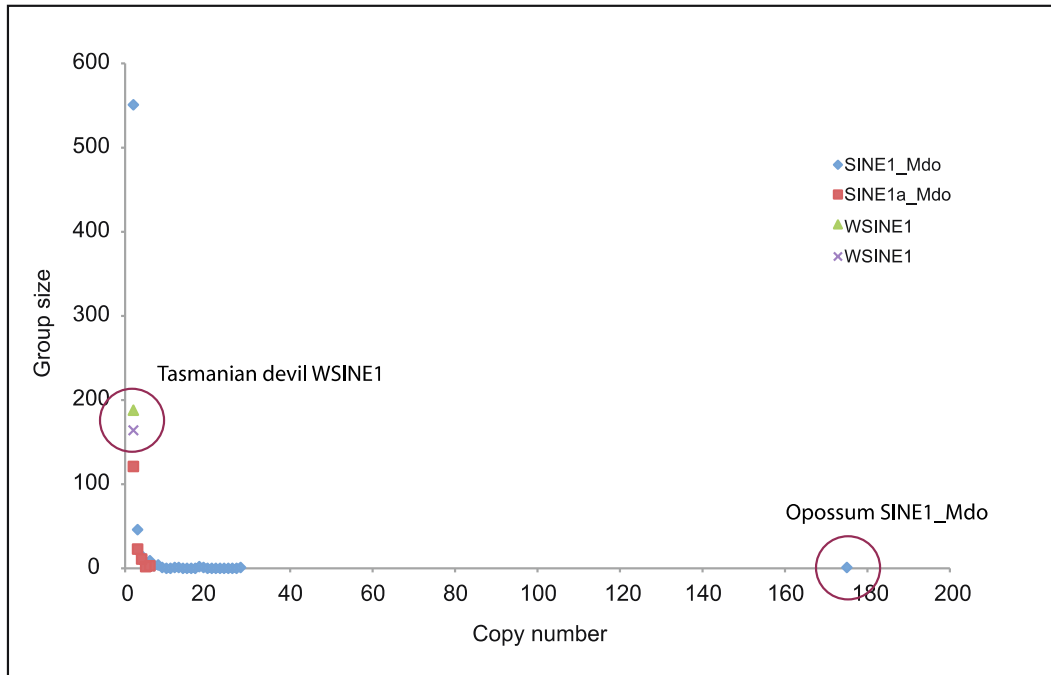

**Supplementary Figure 3.** Plot of the group size distributions of identical SINEs in the opossum (SINE1\_Mdo) and Tasmanian devil (WSINE1) genomes. In the Tasmanian devil genome, maximally two identical SINEs were found in each group (red circle). In opossum SINE1\_Mdo is the only SINE that has one large group (175 copies) of potentially recently propagated copies (red circle).

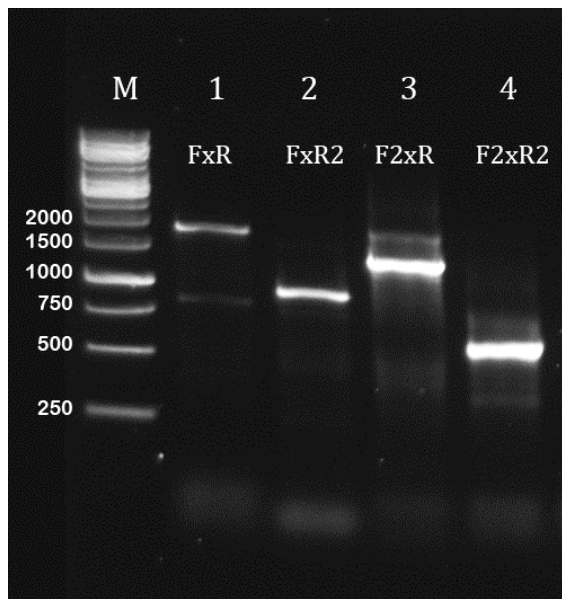

**Supplementary Figure 4.** RT-PCR of the OC1\_SH DNA transposon in the fat-tailed dunnart. The amplified region (1) covers 1,909 nt of the transposase ORF from the ATG start codon to 10 nt from the stop codon. Four PCR (1,2,3,4) reactions were run for each species using different primer combinations. For primers see Supplementary Table 7. M: marker GeneRuler 1Kb.

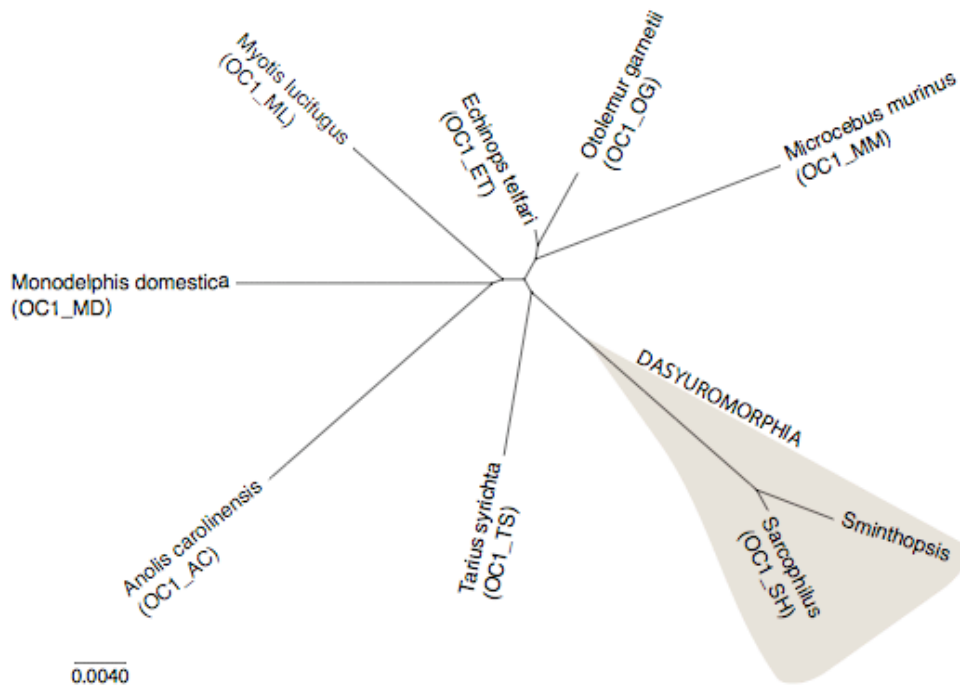

**Supplementary Figure 5.** Phylogenetic analysis of the DNA transposon OC1 transposase ORFs in the Tasmanian devil and fat-tailed dunnart genomes compared with OC1 from other vertebrates. The OC1 from Tasmanian devil and fat-tailed dunnart cluster together to the exclusion of the other species. The scale bar indicates amount of substitutions per site.

### A. OC1\_Das transposon

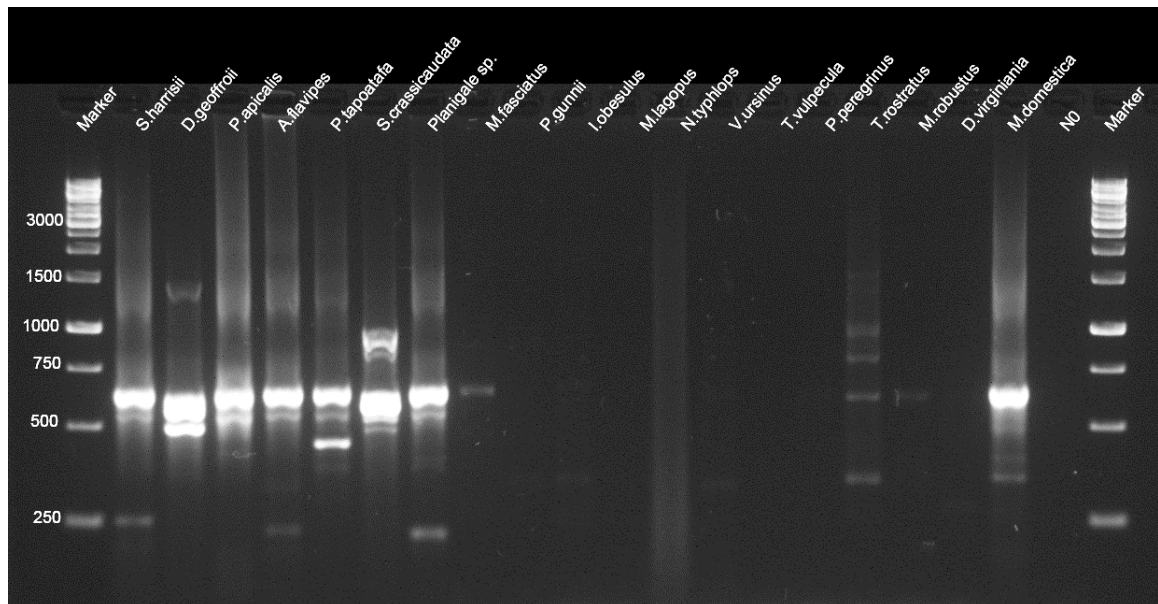

### B. hAT-1\_MEu transposon

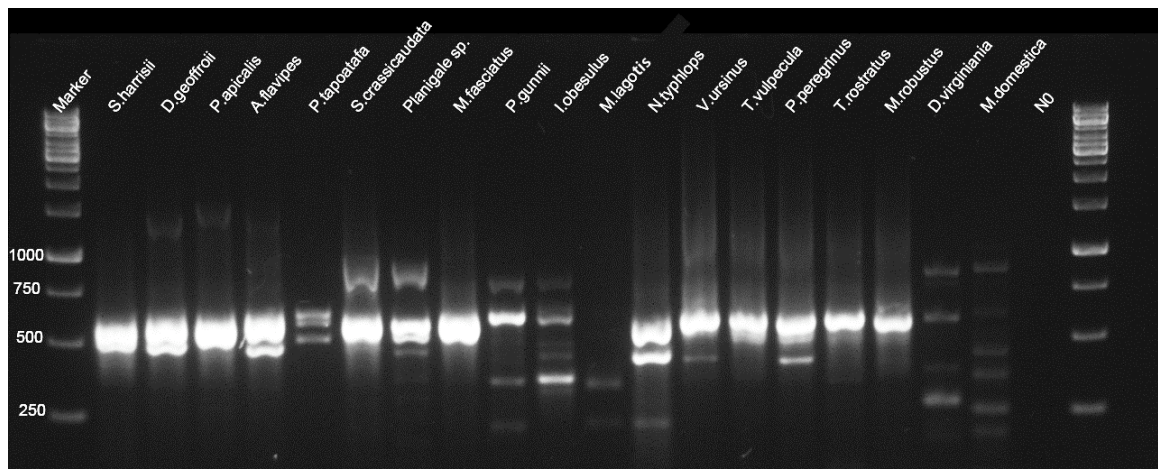

**Supplementary Figure 6. DNA Transposons.** (A) Genomic PCR (533 nt) of the OC1\_Das DNA transposon from all four Australian orders and one South American order. (B) Genomic PCR (611 nt) of the hAT-1\_MEu DNA transposon from all four Australian orders and one South American order. The absence of the amplification in *M. lagotis* suggests a possible independent transfer into the four different orders. N0: negative control. Marker: GeneRuler 1Kb

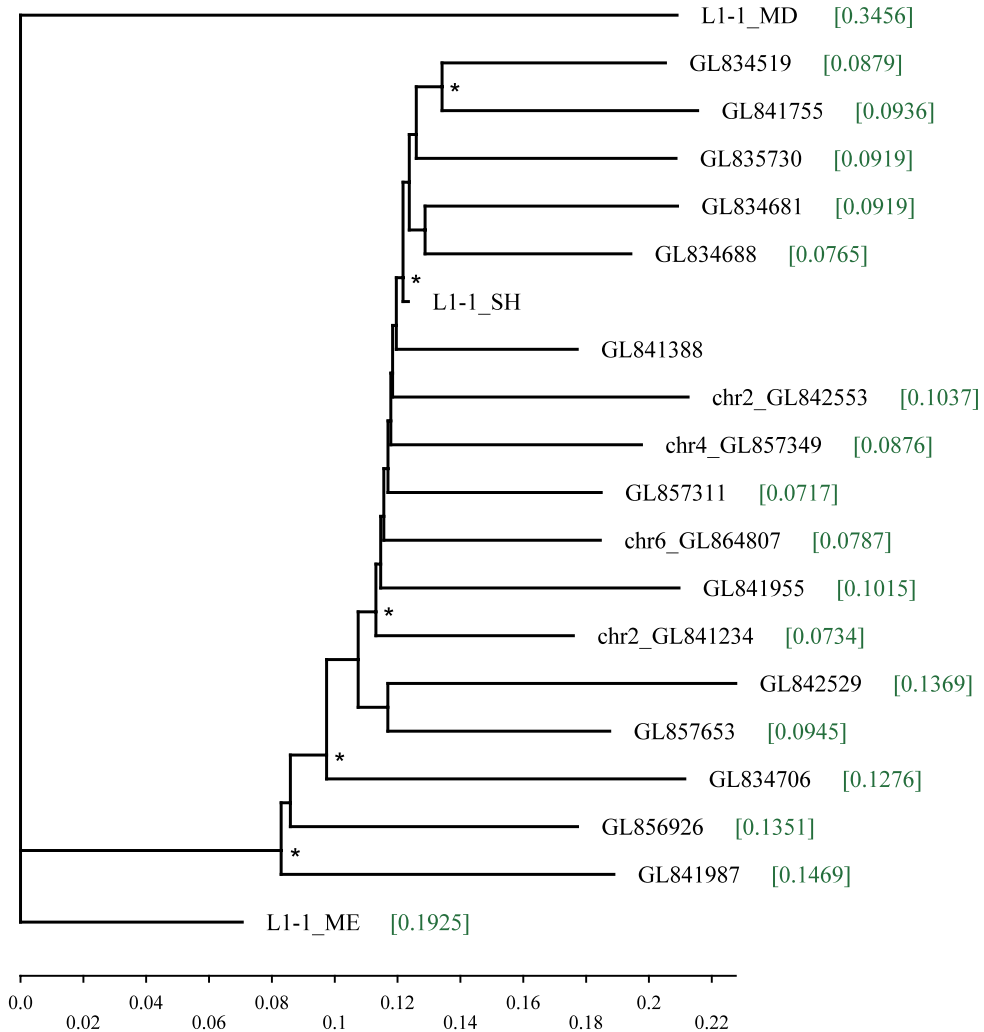

**Supplementary Figure 7.** Phylogenetic tree of the 17 L1-1\_SH copies. The tree was calculated with maximum likelihood using the GTR+G(5) model on an alignment (4,234 nt) of ORF2 using the opossum L1-1\_MD and tammar wallaby L1-1\_ME ORF2 sequences as outgroup. The green value in square brackets following the scaffold name (supplementary table 1), is the pairwise distance to the L1-1\_SH consensus sequence for each L1 copy. The scale bar indicates the evolutionary distance in substitutions per site. \* indicate nodes that have over 90% support values as calculated by TreeFinder.
