# Supplementary material for: Evolutionary Histories of Transposable Elements in the Genome of the Largest Living Marsupial Carnivore, the Tasmanian Devil
Source: PubMed Central journal article supplement — Mol Biol Evol. 2015 Jan 28;32(5):1268–83. doi: 10.1093/molbev/msv017 (PMC4408412; doi:10.1093/molbev/msv017), 2015-01-28
Supplement: supp_msv017_SupplementaryDataSet1.pdf [file supp_msv017_SupplementaryDataSet1.pdf]

**Supplementary data set 1.** Fasta alignments of the 18 introns containing phylogenetically informative retrotransposon insertions.

Species abbreviations used in the alignments

| Abbreviation | Common name              | Scientific name                  | Note            |
|--------------|--------------------------|----------------------------------|-----------------|
| Sha DB       | Tasmanian devil          | <i>Sarcophilus harrisii</i>      | Genome sequence |
| Sha CPH      | Tasmanian devil          | <i>Sarcophilus harrisii</i>      | Copenhagen Zoo  |
| Dge          | Western quoll            | <i>Dasyurus geoffroii</i>        |                 |
| Pap          | Dibbler                  | <i>Parantechinus apicalis</i>    |                 |
| Afl          | Yellow-footed antechinus | <i>Antechinus flavipes</i>       |                 |
| Pta          | Brush-tailed phascogale  | <i>Phascogale tapoatafa</i>      |                 |
| Scr          | Fat-tailed dunnart       | <i>Sminthopsis crassicaudata</i> |                 |
| Pin          | Planigale                | <i>Planigale sp.</i>             |                 |
| Mfa          | Numbat                   | <i>Myrmecobius fasciatus</i>     |                 |
| Pgu          | Eastern barred bandicoot | <i>Perameles gunnii</i>          |                 |
| Iso          | Southern brown bandicoot | <i>Isodon obesulus</i>           |                 |
| Mla          | Bilby                    | <i>Macrotis lagotis</i>          |                 |
| Nty          | Marsupial mole           | <i>Notoryctes typhlops</i>       |                 |
| Meu          | Tammar wallaby           | <i>Macropus eugenii</i>          |                 |
| Mro          | Wallaro                  | <i>Macropus robustus</i>         |                 |
| Tro          | Honey Possum             | <i>Tarsipes rostratus</i>        |                 |
| Ppe          | Common ringtail possum   | <i>Pseudocheirus peregrinus</i>  |                 |
| Tvu          | Common brushtail possum  | <i>Trichosurus vulpecula</i>     |                 |
| Vur          | Vombat                   | <i>Vombatus ursinus</i>          |                 |
| Dvi          | North American opossum   | <i>Didelphis virginiana</i>      |                 |
| Mdo          | South American opossum   | <i>Monodelphis domestica</i>     |                 |



GTGATCCTGTGATCATGACTTCAAATGA-----AGATTAACTCTTAGCCCCCAAAGATGTTTGGGACTCCTG  
TTGTTCCCCAGAGGGAGGCTGACCTCCTTGTGTGCTCTACCTCCA-----AGACCTCATGACTACTCA  
GC--TGATGGGTTTAATGACT

>Sha CPH

-----CCCATGGGCACCCGCTCTACCTTGCTGGCTTCC-AGGTAGATAC  
TGTCTTTCTCCCTGGGACACAACCTCATTTTCATAT-CTATGG-----AAC---TTTTGTGTCT-AATTC--  
TTA-GCCCATGGCTT-----CCCTTACTCCAGGGGACCCTC-AATAGATCAATCAAGA-  
-----TCTTCCTAATT-----GGGGCAACTAGGTGGCTCAGTGGATAGAGCACCAGCCCTGAAATCAGAAGGACCC  
AAGTTCAAATTTGATATCAGACACTTAACACTTCCCTGTCTGTGTGACCCCTGGGCAAGTCACCTAATCCCAATTGAGTCAG  
GAAAAAAAAAAAAAGA-----TCTTCCTAATT-----GACTATGGG-CCCTAACTCCA-----GCAGTAGCA-  
-----GGAGAGGTGGGTAGATAGAACTGACTACTATTTCCCTTTCTCCCTCTCAGCA-----GCCCTCTACCC  
AGAGCTCTTAAA-----GGAAGGGGACT-AGGATTTTGGAA---TTGGAAAACCTGGTTTTACATTCTAG--CT-GTT  
CCCCTTT-----ACTACCTGTGTTTCCCTTGGGCAAGTGGTTTAAATGTC--A  
GGGCTCTGACTTCCC---ATGTAAAATGAGAGCCGTGG-----CCCCTTTCCAGCTCTTAAATTCT  
GTGATCCTGTGATCATGACTTCAAATGA-----AGATTAACTCTTAGCCCCCAAAGATGTTTGGGACTCCTG  
TTGTTCCCCAGAGGGAGGCTGACCTCCTTGTGTGCTCTACCTCCA-----AGACCTCATGACTACTCA  
GC--TGATGGGTTTAATGACT

>Dge

-----CTCCATGGGACACAACCTCATTTTCATAT-CTATGG-----AAC---TTTTGTGTCT-AATTC--  
TTA-GCCCATGGCTT-----CCCTTACTCCAGGGGACCCTC-AATAGATCAATCAAGA-  
-----TCTTCCTAATT-----GGGGCAACTAGGTGGCTCAGTGGATAGAGCACCAGCCCTGAAATCAGAAGGACCC  
GAGTTCAAATTTGATATCAGACACTTAACACTTCCCTGTCTGTGTGACCCCTGGGCAAGTCACCTAATCCCAATTGAGTCAG  
GAAAAAAAAAAAAAGA-----TCTTCCTAATT-----GACTATGGG-CCCTAACTCCA-----ACAGTAGCA-  
-----GAAGAGGTGGGTAGATAGAACTGACTACTGTTCCCTTTCTCCCTCTCAGCA-----GCCCTCTACCC  
AGAGCTCTTAAA-----GGAAGGGGACT-AGGATTTTGGAA---TTGGAAAACCTGGTTTTACATTCTAG--CT-GTT  
CCCCTTT-----ACTACCTGTGTTTCCCTTGGGCAAGTGGTTTAAATGTC--A  
GGGCTCTGACTTCCC---ATGTAAAATGAGAGCCGTGAT-----CCC-----  
-----GTGATCATGACTTCAAATGA-----AGATTAA--CTTAGCCCC- AAAGATGTTTGGGACTCCTG  
TTGTTCCCCAGAGGGAGGCTGACCTCCTTGTGTGCTCTACCTCCA-----AGACCTCATGACTACTCA  
GC--TGATGGGTTTAATGACT

>Pap

-----GCCCATGGGCAC-CGCTCTACCTTGCTGGCTTCC-AGGTAGATAC  
TGTCTTTCTCCCTGGGACACAATCTCATTTTCATAT-CTATGG-----AAC---TTTAGTGTCT-AATTC--  
TTA-GCCCATGGCTT-----CCCTTACTCCAGGGAACCCTC-AATAGATCAATCAAGA-  
-----TCTTCCTAATT-----GGGGCAACTAGGTGGCTCAGTGGATAGAGCACCAGCCCTGAAATCAGAAGGACCC  
GAGTTCAAATTTGGCCTCAGACACTTAACACTTCCCTGTCTGTGTGACCCCTGAGCAAGTCACCTCATCCCAATTGAGTCAG  
AAAAAAAAAAAAA-----TCTTCCTAATT-----GACTATGGA-CCCTAACTCCA-----ACAGTAGAAG  
GAAGAGGAGAGGTGGATAGATAGAACTGACTACTGTTCCCTTTCTCCCTCTCAGCA-----GCCCTCTACCC  
AGAGCTCTTAAA-----GGAAGGGGACT-AGGATTTTGGAA---TTTGAAAACCTGGTTTTACATTCTAG--CT-GTT  
CCCCTTT-----ACTACCTGTGTTTCCCTTGGGCAAGTGGTTTAAATGTC--A  
GGGCTCTGACTTCCC---ATGTAAAATGAGAGCCGTGG-----CCCCTTTCCAGCTCTTAAATTCT  
GTGATCCTGTGATCATGACTTCAAATGA-----AGAGTAACTCTTAGCCCCCAAAGATGTTTGGGACTCCCC  
T-----GAGGGAGGCTGACCTCCTTGTGTGCTCTACCTCCA-----AAACCTCATGACTACTCG  
GC--TGATGGGTTTAATGACT

>Af1

-----CGCCCATGGGCACCCGCTCTACCTTGCTGGCTTCC-AGGTAGATAC  
TGTCTTCTCTCTGGGACACAACCCCATTTTCATAT-CTATGG-----AAC---TTTTGTGTCT-AATTC--  
TTAACCC-ATGGCTT-----CCCTTACCCAGGGGACCCTC-AATAGATTGATCAAGA-  
-----TCTTCCTAATT-----AGGGCAGCTAGGTGGTGCAGTGGAAAAGAGCACCAGCCCTGAAATCAGAAGGACCT  
GAGTTCAAATCTGATCTCAGACACTTAACACTTCCCTGGCTGTGTGACGCTGGCCAGTCACCTAATCCCAATTGCATCAG  
AGAAAAAAAAAA-GA-----TTTTTCTAACT-----GACTATGGG-CCCTAACTCCA-----GCAGTAGAAG  
GAAGAGGAGAGGTGGGTACATAGAAGCTGACTACAGTTCCCACTTCCCTCTCAGCA-----GCCCTCTAC-C  
AGAGTTCTTAAAGTAT--AGGAAGGGGACT-AGGATTTTAGAA---TAGGAAAGTCTGGTTTTACATTCTAG--CT-GTT  
CCCCTTT-----ACTATCTGTGTTTCCCTTGGGCAAGTGGTTTAAATGTC--A

GGGCCTCTGACTTCCC---ATGTAAAATGAGGGCCATGG-----CCCCTCTCCAGCTCTTAAATTCT  
GTGATCCTGTGATCATGACTTCAAATGA-----AGAGTAACTCTTAGCCCC-----

>Scr

-----TAC---TCCT--CGCCCATGGGCACCCGCTCTACCTTGCTGGCTTCC-AGGTAGATAT  
TGTCTTCCCTCCCTGGGACACAACCCTATTTTCATAT-CTATAG-----AAC---TTTTGTATCT-AATTC--  
TTA-GCCCATGGCTT---CCCCTGGGATTTTGGGAGGGTCTC-TCTTACCCAGGGGACCCTC-AATAGATCAATCAAGA-  
-----TCTTTCTAATT-----GGGGCAGCTAGGTGGCACAGTGGATAGAGCACCAGCCCTGAATTCAGGAGGACCT  
GAGTTCAAATGTGGTCTCAGACACTTAAACTTCCCTAGCTGTGTGATCCTGGGCAAGCCACTTAACTCCA-GCCTCAGGG  
GGAAAAAAAAA-GA----TCTTCCTAATT-----GACTATGGG-CCCTAACTCCA-----GCAGCAGAGG  
GAAGAGGAGAGGCGGGTAGATAGAACT---AACTA--CTGTTCCCTTCCCTCAGCA-----GCTCTTACCC  
AGAGCTCTTAAAGTTC--AGGGAGGGGACT-AGGATTTTAGAA--TTGGAAAACCTGGTTTTACATTTAG--CTGGT-  
CCCCTT-----TACTATCTGCATTTCCCTTGGGCAAGTGTCTTAAATGTC--AAATTCT  
GGGCCTCTGA-----CCCCCTTCCAGCTC--AAATTCT  
GTGATCTTGTGATCATGACTTTCAGAAGA-----GTAGTAACTCTTAGCCCCCA-GGATGTTAGGGACTCCCG  
TTGTTCCCAGAGGGGGCTGATCTCCTTTGTTGTCCTCCACCTCCA-----AGACCTCATKACTACTCG  
-----

>Mfa

CGCCGTGGGGACCTGGCCATT-TACC--TCATCAGCCCCATGGGCACCCGCTCTACCTTGCTGGCTTCC-AGGTAGATAC  
TGTCTCCCTCCCTGGGACATAAACTTATTTTCATAT-CTGTAG-----AAC---TTTTGTGTCT-AGTTC--  
TTA-GCCCATGGCTT---CCCTTGGGATTTTGGGAAGGTTTC-----AATAGATTAGTCAAGG-  
-----TCTTTCTGATT-----  
-----GGCTGTAGG-CCATAACTCCA-----GCAGCAGAGG  
GAA--GAGGAGGTGTGTAGATAGAAATTGACTACTGTTGCCCTTCCCTTATCAGCA-----GCCCTTACCC  
AGAGCTCTTCAATTGT--AGGAAGGGAGCT-AGGATTTTAGAA--TTGGAAAACCTGGTTTTCAAATTC-----  
-----  
-----

>Iob

CGACGTGGGGATCTGGCCATT-TACC--TCRTCAGCCCCATGGGCACTCGTTCTACCTTGCTGGCCTCC-AGGTAAGTCC  
TTTCTCCCTCCCTAAGTCACAGTCCCTATTTCCCTAT-CTAG-----AAC---TTATGTGTCT-AGGCT--  
T-----CCCTTGGGATTTTGGTAGGG-CATTCCTTACCCAGGGGATCCCC-AACATA-----  
-----TTTTCCTATTT-----  
-----GACTGTAGG-TCATAACTCTG-TTACTT--GGAGC-----  
---AACAAGAGGAGTATAGGTGGAAACGAACCGCTTCTCCTTTTCCCTCCCTAGCAGCAATACCCTCTCCTCCCCCGTCC  
AGACCCCC-----AAGAGTT-GGAATAATTGGA-----TTCAAATTTTAGGTC---TT  
-CCCTTT-----ACTACCTATCTTTACTATA-GTCTTGTCTTC-----A  
GGACCTCTGATCCCATTTATAAAATGAGAGGCCTGGCCTTTCTGT-----  
--GATGCTGTAAA-----TGAAGAATA-----AATAGCTCCTTATCCCTCAAAGATGTTAGGGAATCCTG  
TCACACCCAGAGGAAGCTTGATTTCTTTGTTGTCCTCCCAACCC-----AGACCTCATGACTACTCA  
GC--TGATGGGTTTAAATGACT

>Meu

AGACGTGGGGACTGGGTCAATTTACC--TCGTCAGCCCCATGGGCACCCGCTTTACCTTGCTGGCTTCCCAGGTAGGTAC  
TATTTCTCTCCCTAGAAGTCTT-ATTTTCATAT-CTATAG-----AAA---TCTTGTGTCT-AGTTT--  
TTA-GCCCATGGGCTTCCCTTGGGATTTTGGGAGGGGTATCCCTTATCCCAGGCGGCCCTTTAACAGAAAACTGAGA-  
-----CCTTCCTAATT-----  
-----GACTGCAGGGCCATAACTTT--TAGCAGTGGAGG-----  
-----CAAGAGGAGTATAGGTAGAAACCA-----CCTGCTGCTTCCGTCTTAGCAA-----CCCCTGCC  
AGACCTCTT-----GGGTTTTGGAA--TTGGAAAACCTGGGTTAGATTTCTAGCTC--TT

-CCCTTT-----ACTACTTGTGTTTCCTTGGGCAAGCCATCTAACCTT--A  
GGGCCTCTGAGA-----GGCATGGTCCTTCTGT-----  
GCTCCTGTCATCATTAGGCTTCAGATGA-----AGAATAACTTCTTACCCCTC--GAGATGTTAGGGACCCCTG  
TCGCACCCCAGAGGAAGCCTGATTTCTTTTGTATCCCCCACCTTCA-----AGACCTCATGACTACTCT  
GC--TGATGGGTTTAATGACT

>Mdo

CGACGTGGGGACCTGGCCATT-TACC--TCGTAAGCCCCATGGGCACCCGTTCTACCTTGCTGGCTTCC-AGGTACATAT  
TCTCTTCCCTCCCTCGAACACTGCCCTATTTTCATAT-CTGTGA-----AAC---TTCTGTGTCA-AGTGC--  
TCA-GCCCAGGGCTT--CCCTTGGGGTTGTCCTTGGGGTGTCCCTTACCCCAGGGGGGCCCTCTACAGACCA-----  
-----CTTTCCTAAGC-----

-----AACATCTTCTAGCCATGGAGG-----  
CCAGAGGAGAGGAGCCCAGCTAGAGACTC-----CCTC-TTCTCCCTATCCACAA-----CCCCCTGTCC  
AGACCTCTTACAGTGTGGGAAGAGAATGACTAGATTTTTGGAAA--T--GAAA-----  
-----TTCAAATTCCAGCTCTTCAGTTTACTACCTGTGCTCGCTTGGGAGTGCCAGTGAACTCC--A  
GGGCCTCTGATTCCTCCTGCAGAATATGAGAAATGGCCCTTCT-----  
-----AATTCAGAGAA-----AGATCACTCCCTTCCCCCAAAGGGAAGTTAGGGACTCCTG  
GTGCACCCCAGAGGAAGCCTGATTTCTTTTGTGTCCCC--CTCCA-----AGACCTCATGACTACTCA  
GC--CGATGGGTTTAATGACT



GGTGATTCTCCAC-----AGGATCTTGAAGCAGTACAGTCACCCCAACATCGTGCGCCTCAT-----  
-----

>Pap

AAG-----GT-----GAGGAGGAGGAGTATTATCGTCAAGCTCCTAGTCTGCCCTAGCTC  
GTT-----TTCAAGCTAA---TGCCC--TATTCAATTTACTTGTGC-AAGCACCTACATTGTTCACTCGGC---AGAA  
ATAGGAAGTT-TAGGCAAGACATAGTCCCCAGCCTCTTGGTTCATATCACAGGGAGGTCCTGTCAGAGCCTAGA-AAAGA  
AAGTTGAATCCCTCAATAAATTTTGGAAATGTGTTTCATCAACATGAGAAGG-TTGAACCCTTTATTCATGCTCTTACC  
-----CATTATT-----ATTATTATTA----TTTTGCTGAGACAATTGGGGCTAAGTGACTTGCCC  
AGAGTCATACAGCTAGGAAATGTTAAGTGTCTGAGGACACATTTGAATTCAGGTCCTGGTGTTCAGCAGGTTTCATATAA  
AAAATGAACTGATTCAGCCCCTTCAGGGCTGGGGCTCTACCCACTGCACCACCCAACCTGCTCCTC-----CATTATT---  
-----TGTTACGGGC-ATGAAAGCTTCACTATGGTATCTCTCACTTGATAAAAACAAAATAAGTTCCCCCATGTCCCTG  
AGAGCCG----AGCTC----ATTGACAATATGT--ACATTTATAAAAAAGTAATATTTAAAAGGGGTCTCTAGAAATGTC  
CTCTGTGCTGGGCCCTGGGCAGCCACCTGCATTGCTTACCCTAGCAATGGGCTGTACCTACCAC---TCGCCACCTCCC  
-GCTGCCAAGGAAGAGAGGACACAGAAAGGTTTCTATTAAAATAGGGCTATAAATGTGACCCTGACCAGACCCCTCCCAT  
GGTGATTCTCCAC-----AGGATCTTGAAGCAGTACAGTCACCCCAACATCGTGCGCCTCAT-----  
-----

>Afl

-----  
-----  
-----ATCACAAAGGTCGTACCGGCACAGCGAAGA-GAAGA  
AAGAATACTTCTCCATAAATTTTGGAAATGTGTTTCATCAACATGCGAAGG-TTGACCACCTTTATTCGTTGCTCTTACC  
-----CATTATT-----ATTATTATTATTATT-TTGCTGAGACAATTGGGGTTAAGTGACTTGCCC  
AGGGTCACACAGCCAGGAAGTGTAAARTGTCTGAGGTTACATTTGAACTCAGGTCCTGGTGTCTT-----  
-----CCGGGCTGGTGTGAGTG-CCCACTGCACCATCCAGCTGCCCTTC-----CATTATT---  
-----TGTTACAGGT-ATGAAAGCTTCACTATGGTATCTCTCACTTGATAAAAACAAAATAAGTTCCCCCATGCCCTG  
AGAGCCG----AGTTC----ATTAACAATATGC--ACATTTAT-AAAAAGTAATATTTAAAAGGGTCTCCAGAAACGTC  
CTCTGTGATGGGCCCTGGGCAGCCACCTGCGTTGCCACCCCTAGTGATCGGCTGTACCGACCACCACTCGCCACCTCCC  
-GCTGCCAAGGAAGCGAGGACGCAGAAGGTTTCGGTGGAAAGTAGGGCTATAAATGCGACCCTG-----  
-GTGATTCTCCAC-----AGGATC-TGAAGCAGTACAGTCACCCCAACATTTGTGCGCCTCAC-----  
-----

>Scr

AAG-----GT-----GAGGAGGAGGAATATAA-TATCATCATCAAACCTCCTAGTCTGCC  
TAGCTCT-TTTTCAAGCTAA---TGCC---TAGTCAGTTTACTTGTGCCAAGCACCTACATTGTACACTTGGC---AGAA  
ATAG-----ACAAGATATAGTCCCCAGCTTTTTTAGTTCCATATCCCATGGAGGTCCTGACAGAGCCTAGA-AAAGA  
AAACTGAATCCCTCAATAAATTTTGGAAATGTGTTTCATCAACATGTGAAGG-TTGAACCCTTTATTCATTACTCTTACC  
-----CATTATT-----ATTATTATTATTA-TTTTGTGCTGAGACAATTGAGGTTAAGTAACCTTGCCC  
AGGGTCACACAGCTAAGAAGTGTAAAGTGTCTGAGGCCGATTTGAACTCAGATCCTCCTGATT-----  
-----TCAGGGCTGGTGTCTCAACCCTGCACCAACTACATGCCCC-----TTTTATT---  
-----TGTTACAGAT-ATGAAAACCTTAACATATCGTATCTCTTGCTTGATAAAAACAA----GTACCCCCATGCCACTG  
AGAGCAG----AGTTC----ATTAACAATATGT--ACATTTAT-AAAAAGTAATATTTAAAAGGGTCCCTAGAACTTC  
CTCTATGTTGGGCCCTGGGCAGCCACCTGCATTGCTTACCCTAGTAAATGGCTGTAC-TATCCCC--TCACCACCTCCC  
TGTTGCTAAGGAAGAGAGGACACAGAAAGGTTTCTATTAAAGTAGGGCTATAAATG-----TCCCAT  
GGTGATTCTCCAC-----AGAATCTTGAAGCAGTACAGCCACCCCAACATTTGTGCGACTCAT-GGTGTC  
TGTACCCAAAAACAGCCTAT-

>Mfa

AAG-----GT-----GAGGAGGAGGAATATAG-TATCATCATCAAGCTCCTAGTCTACCC  
TCGCTCA-TTTTCAAGCTAA---TGCC---TATTCAGTTTAC-TGTGCCAAGCATCTACATTCTACACTTGGC---AGAG  
ATAGGAAGTTTAGGCAAGACATAGACCCCTCTTTCATGGCTCATATCACAGGGAGGTCCTGACAAAGCCAAGA-AAAGA  
AAGTTGAATCCCTCAATAAATTTTGGAAATGTGTTTCATCAACATGTGAAAG-TTGAACCTTTATTCATTACTCTTACC  
-----CACTATT-----ATTATTATTATTATTATTATTACTTTTGTGCTGAGACAATTGGAGTTAAGTGACTTGCCC  
AGGGTCACACAGCCAGGAAGTGTAAATGTCTGAAATCAGATTTGAACTCAGG-----  
-----TCCTCCTGGTGTCTATCCACTATATCAAATAGATGCCCTC-----CATTATT---  
-----TGTCACAAAT-ATGAAATCTTCACTATGGTATCTTTCACTTGATAAAAACAAAATAAGTACCTCCCTGCCACTG  
AGAGCAG----AGCTC----ATTAACAATATGT--ACATTTAT-AAAAAGTAATATTTAAAAGGGTCCCTAGAACTTC  
CTCTATGTTGGGCCCT-----GCATTACCTACCCTAGTAACTGGCTGTACCTACCTAC--TCACCACCTCCC

TACTGCTAAGGAAGAGAGGACACAGATAAGTTTCTATTAAAGTAGGGCTATGAAGGTGACCT-GACCAGATCCCCTCAT  
GGTGATTCCCTCAC-----AGAATCTTGAAACAGTACAGTCACCCCAACATTGTGCGACTCAT-GGCGTC  
TGTACCCAAAAACAGCCTAT-

>Iob

AAG-----TTCGCAGGAAGCAAGGTGAAAAGTAGTAGTATAG-ATTCTTCATCAAGCTCCTGGACTGCCC  
TAGTTCA-TTTTCTAGTTGAC--TGACTCCTATTCAATTTACTTAT--CAAGCACC-----TGGGG---AAAG  
ATAAGAAATTGAGGCAAGACATAT-----CCTTCATGGCTCATGTCACAAGGAAATCCTAGCAAGGCTAGA-AAAA  
CAGTTGAATCACTCAATAAATTTTGAATAATTTGTAATTC-TCAGCATGTGAAAA-TTAAACCCTTTATTTCATTACCATTACC  
-----CATTGTT-----

-----TGTTACAGAT-TTGAATCTTCTCTATAGTATCTGTGACTTGATAAAACAAAGTACATCCTTCCATGCCACTG  
AGAGCATTATAGCCTCTTCTTTCTACAAGATAAATACATT-AT-AGAAAGTAATATTAATAAAGAGCCCCAGAAGTCCC  
CTTTATATTGGGCCT-----

>Nty

-----TGCTCC-TATTCAATTTACTTGTGACAAGCACCTTCATTTTGCACCTTGGGAAGAGAG  
AT--GAAATTTAAGCAAGACATAG-TCCCTACCCCTCATGGCTCATGTCACAAGGAGATCCTAGCAGAGTCTGGAAAACGA  
CAGTTGAATCCCTCAATAAATTTTGAATAATTTGTAATTCCTCAGCATGTGAAAA-TTGAACCTCTTATTTCATTATCACTATC  
-----AGTTATT-----

-----TGTTATGAGGTTTGAACATTTCACTATTATATCTGTGACTTGATAAACCAAATAAATATCTCCATGCCACTG  
AGAGCAG-----TTTATTAACAATATGT--ACATTTAT-ACAAAGTATATTTTTAGAAAGGTCCTTGTAGCTCC  
CTCTATGTTGGACCC-----TCCATTGCCCCCTGCTAGTTGTAACCCTACCTAGATA-CTCTCTCCATCTCCC  
TACTGCTGAGGAAGAGAGGACATAGATTATACTGTATTAAAATAGGGTTATGAATCTGACTCTAACCAGATCCTTCCCCT  
GGTGATTCCCTCAC-----AGAATCTTGAAAGCAGTACAGTCACCCCAACATTGTGCGACTCAT-GGCGTC  
TGTACCCAGAAACAGCCTAT-

>Meu

AAG-----TT-----GAGGAGGAGTAGTGTAGAT-TCATCATCAAGCTCATAGTCTGCCC  
TGACTCAT-TTTCAGGAGAA-----CTCC-TATTCAGTTTACTTGTGTCAAATACCTACATTGTGCACTTGGG--GAGAG  
ATAGGAAGTTTAGGTAAGACATAG-TCCCTATCATTATGGCTCCTGTTCCAAGGAGATCCTAG-AGAATCTGGA-GAAGA  
CCATTGAATCTCTCAATAAATTTTGAATAATTTGTAATTCCTCAGCATGTGAAAAATTGAAC-CTTTATTTCATTTCTGTTACC  
-----CATTATT-----

-----TGTTTTGGGC-TTGATATCTTCACTTTAGTATCTGTAACCTGATAAAAGAAAATACATACCTCCAGGCCACTG  
AGAGCAG-----AGTTCATTAGCAGTATGT--ACACTTAG-AAAAATTTATATTATAAAGGGCTTTTGTAGCCCC  
TACTATGTTAGGCC-----AACCTGCATTGCCAACCCCTAATTCTAGCCCTGCCTTGGTACAT---TCCAGCTCCC  
TATTGCTGGGGAACAGAGGTCACAGATTGTACTGTATTAAAGTAGGGTTATGAATCTGGCCATGACCTGATACCTCCTCT  
GGTGATTCCCTCAC-----AGAATCTTGAAAGCAGTATAGTCACCCCAACATTGTGCGACTCATTTGGCGTC  
TGTACCCAGAAACAACCTAT-





GAAGATGGGGAAATATAAAGAT-TTCTTTGCTTATCATTCTTAGTYTTTTTTTCTTTTCTTTCCCC-----  
--AGGCACAGTTCGGGTGACAACAGCTGCCACC-TGCCCTACTGGTAG-----

>Pap

-----GACG-CCGTGCCTGGAAGACTTTCATCGGT-----AA  
AGAGCACCCCTCATCTTTTCCCAAGACCTTAAGCAAGAATTGTAATTATCTTCTTAACTCCCCTCTCYATCCTCTGAATT  
AGAGGCCACTGTATTGCTGAGACTGAGATATCCATTGCAGTGCTAAAATAATGAAGACAGT-TAAG----GTTAACCC--  
-TAATCCTTTGCTCCTTGATCTTATTTTCGCATGTGAAAT-----GTTTGCAAATGCTTCCATTAAGAAT  
ACATTTTCTCCTTATTTCTGAATTTTCTATTTCCAGGTTTTTAATTGTGAATTTCTGTCTTAATGTTTTTGTA-----  
---TTCTCCACCAACAGCAGCC-----TCTCACACTT-ACTTATTGATTCCCAATTCCTG-----AAAATAC  
AAC-----TTTGTGTGGCACAGTGGTTAGAGCACCAGCCCTGAAGTCAGGAGGACCTGAGTTCAAAATTTGGCCTCAGAAA  
CTTAATACTTCCCTAGCTGTGTGACCCTGGGCAAGTCACCTAACCCCAATTACCTCAGCAAA-AAA-GAAAAGAAAAGAAA  
ATT-----AAAATACAAC-----ATTGTGATTTTCCACATGAGTTCACGTTTGTGT-AGCCAA-----  
---GAGCAAATTTTATCATCTCATTAAGACAGCA---CATGGTGGTFCACATGTTCTTTTTTTTTTTTTTT-----  
-----CTTTAATCCTTGCTATATGAATGTAAAATAAAATTTAGCC-----CAAATGGTGATCTTTTAA  
GAAGATGGGGAAATATAAAGAT-TTCTTTGCTTATCATTCTTAGTCATTTTTTCTTTTCTTTTCCC-----  
--AGGCACAGTTCGGGTGACAACAGCTGCCACC-TGCCCTACTGGTAGCCAAAA-----

>Afl

ATGGGGTGGCCCAATGGCTGGCGCCAGAGTGAGGAYGCCCGTGCCTGGAAGACTTTCATTGGT-----AA  
AGAGCACCCCTCTTCTTTTCCCAAGGCCCTTAAGCAAGAATTGTAATTATACTCTTAACTCCCCTCTCTATCCTCTGAATT  
AGAGGCCACGGTATTGCTGAGACTGAGATATCCATTGCAGTGCTAGAATAATAAGACAGT-TAAG----GTTAACCC--  
-TAACCCCTTGTCTTCTTGAGCTTATTTTGCATGTGAAATGCTTATTTTCAGC-AAGTTTGCAAATGCTTCCATTAAGAAT  
ACATTTTCTTCTTATTTCTGAATTTTCTATTTCCAGGTTTTTAATTGTGAATTTCTGTCTTAATGTTTTTGTA-----  
---TTCTCCACCATCAGCAGCC-----TCTCACACTT-ACTTATTGATTCCCAATTCCTG-----AAAATAC  
AAC-----ATTGTGTGGCACAGTGGTTAGAGTACCAGCCCTGAAGTCAGGAGGACCTGAGKTCAAAATTTGGCCTCAAAAA  
CTTAATACTTCCCTAAGTGTGTGACCCTGGGCAAGTCACCTAACCCCAATTACCTCAGCAAA-AAAAGAAAAGA-----  
-----AAAATACAAC-----ATTGTGATTTTCCACATGAGTTCCTGTTTGCCT-AGCCAA-----  
---GAGCAAATTTTATCATCTCATTAAGACAGCA---CATGGTGGTFCACATGTTCTTTTTTTTTTTCTTT-----  
-----CTTTTAGTCCTTGCTATATGAATGTGAACTGAA---AAGCC-----CAAATGGTGATCTTTTAA  
GAAGATGGGGAAATATGAAGAT-TTCTTTGCTTATCATTCTTAGTCTTTTT-CCTTTTCTTTCCC-----  
--AGGCACAGTTCGGGTGACA-CAGCTGCC-ACTT--GCCTACT-GTAGC-AAAA-TGTCTCTCTC---CAGTAT-

>Pin

ATGGGGTGGCCCAATGGCTGGCGCCAGAGTGAGGACGCCCGTGCCTGGAAGACTTTCATTGGT-----AA  
AGAGCACCCCTCATCTTTTCCCAAGGCCCTTAAGCAAGAATTATAATTATACTCTTAACTCCCCTCTCTATCCTCTGAATT  
AGAGGCCCTTGTATTGCCGAGACTGAGATATCCATTGCAATACTAGAATAATGAAGACAGT-TAAG----GCTAACCC--  
-TAACCCCTTGTCTCCTTGATCTTATATTGCATGTGAAATGCTTACTTCAGC-GAGTTTGCAAAGCTTCCATTAAGAAC  
ACATTTTCTCCTTATTTCTGAATTTTCTATTTCCAAGTTTTTAATTGTGAATTTCTGTCTTAATGTTTTTGTA-----  
---CTCCCCACCATCAGCAGCC-----TCTCACACTTTATTTATTGATTCCCAATTCCTG-----AAAATAC  
AAC-----ATTGTGT-GCACAGTGGTTAGAGCACCAGCCCTGAAGTCAGGAGGACCTGAGGTCAAATCTGGCCTCAGACA  
CTTAACACTTCCCTAGCTGTGTGACCCTGGGCAAGTCACCTAACCCCAATTGCCTCATCAA-AAAAGAAAAG-----  
-----AAAATACAAC-----ATTGTGATTTTCCACATGAGTTCATGTTTGGCT-AGCCAA-----  
---GAGCAAATTTTATCATCTCATTAAGACAGCA---CATGGTGGTAAACATGTTCTTTTTTTTTTTTTTTTTTTTTTT  
TTTTCCCCTTTTAGTCCTTTTTTT-----AA  
GAAAATGGGAAAATATAAAGAT-----ATCATTCTTGGTCTTTTTTCTCTTCTTTCCC-----  
--AGGCACAGTTYGGGTGACAACAGCTGCCCATCTTGCCCTACTGGTAGCCAAAAATGTWTCCTTCTTTCCCAGTAAT

>Scr

ATGGGT-GGCCAATGGCTGGCGCCAGAGTGAGGATGCCCGTGC-TGGAAGACTTTCATTGGT-----AA  
AGAGCACCCCTCATCTTTTCCCAAGGCCCTTAAGCAAGAATTATAATTATACTCTTATTTCCCTTCTCTATCCTCTGAATT  
AGAGGCCATTGTATTGCCAAGACTGAGATATCCTTTGCAATGCTAGAATAATGAAGACAGT-TAAG----GCTAACCC--  
-TAACCCCTTGTCTCCTTGATCATATTTTGCATGTGAAATGCTTACTTCAGC-AAGTTTGCAAATGCTTCCATTAAGAAT  
ACATTTTCTCCTTATATCTGAATTTTCTATTTCCAGGTTTTTAATTGTGAATTTCTGTCTTAATGTTTTTGTA-----  
---CTCCTCCACCATCAGCAGCC-----TCACAC-----TTATTGATTCCCAATTCCTG-----AAAATAC  
AAC-----ATTGTGTGGCACAGTATTAGAGCACGAGCCCTGAAGTTAGGAGGACCTGAGTTCAAAATTTGGCCTCAGACA  
CCTAACACTTCCCTAGCTGTGTGACCCTGGGCAAGTCACCTAACCCCAATTGCCTCAGCAAAAGAAAAGAAAAG-----  
-----AAAATACAAC-----ATTGTGATTTTCCACATGAATTAATGTTTAGGT-AGCCAA-----  
---GAGCAAATTTTATCATCTCATTAAGACAGCA---CATGGTGGTFCACATTTTCTTTTCTTT-----

-----CTTTTAGTCCTTGCTATATGAATATAAAA--TTGAA--AAGCC-----TAATTGGTGATTTT-TAA  
GAAAATGGAGAAATATAAAGAT-TTCTTTGCTTATCATTCTTTGGTCTTTTTTCTTTTCTTTCCCC-----  
--AGGCACAGTTCGGGTGACAACAGCTGCCCATCTTGCCCTACTGGTAGCGAAAA-TGTCTCTTTCTTTCC-----

>Mfa

-----TGGCTGGCGCAGAGTGAGGACGCCCGTGCCTGGAAGACTTTCATTGGT-----AA  
AGAGTGCCCCCTGATCTTTTCTCAAGGCTTTAAGTAACAATTGCAATTATATCTTAACTCCCTTCTCTATCTTCTGAATT  
AGAGGCCCGTTGTATTGCTGAGACCTAGATATCCATTGCAGTGCTAGAATAATGAAGACAGT-TAAG----ACTAACAC--  
-TAACCCCTTTGCTCCTTGATYTTATTTTGCATGTGAAATGCTTACTTCAAT-GAGTTTGTAAAATGCTTCCATTAAGAAT  
ACATTTTCTCCTTATCTCTGAGTTTTTTATTTCCAGGTTTTTAATTGTGAATTTCTGTCTTAATGTTTTTGT-----  
---TTCTTCATCAGCAGC-CYC-----TCACACTT-AGTTATTGATTCCCAATTCCTG-----AAAATAC  
AAC-----

-----ATTGTGGTTCTCCACATGAGTTCATTTATGGCT-AGCCAA-----  
---GAGCAAATTTTCATCATTTCATTAATATAGCA---CATGGCAGTCACATGTTTCAATTTTTT-----  
-----TTTTTARGTCCTTGCTATATGAATATAAAA--CTGAAA-AACCC-----AAATTTAA  
GAAGATGGGGAAAAATAAAGATTTTCTTTGCTTATCATTCTTTGGTCTTTTTTTTTTT-----

>Iob

ATGGGTTGGCCCAATGGCTGGCGTCAGAGTGAAGATGCCCGTGCCTGGAAGACTTTCATTGGT-----A  
AGAGCACCCCTCATCTTTTCCCAAGCCATTAGGTACGAGTCGCAGTTAAACCC--AA--TCTCCTCCTATCCTCT-----  
-----CCAGTCTAGTACTGAGAT--GGACACTCATTGCAGTATCAGAATAATTAAGACCCTCTAGGCTGACTCAACACCT  
CCTACCCCTCGCCCCCTTGCTCTTATTTTA-----TACCTCAGATGAGTTTGCAAAATGCTTCCACTAAGAAT  
ACATTTTCTCCTTATCTTTGATTCTGATATTTCTAGGTTTTTAATTGTGAGTTTTTATCTTAATGTTTTTGTACAG---  
-TTCTCTTTACCCATCAGCAA-----ACTTTCACATTT-ACTTATTGGTTCTCAATTGCCTG-----AAAATAC  
AAT-----

-----ACAATATGATTCTCTACTTGAGATTTACGT-GGCT-AACCAGTAGAGGATT  
TTCTGAACA---TTTCATCATCTCATGAATAGAGCA---CGTGGATGTCACATGTTTCAATTTTTT-----  
-----AATCCTAGCCATATGAGTGTAATAAATAAATCAA--AAGCCATCATCTTTCTTTCCCTGATGGTAATCTTT  
TAAGAATGGAAACCATAAAGA-GCTCTTTGCTTATCAGT--ATTGGA--TCTTTCTTTCTTTCCCC-----  
--AGGCACAGTTCGGGTGACAACAGCTGCCACCTTGCCCTACTGGTAGCCAAAAATGTCTCCTTCTTTCCAGTAAT

>Meu

ATGGGTTGGCCCAATGGCTGGCGCCAGAGTGAAGATGCCCGTGCCTGGAAGACTTTCATTGGT-----AA  
AGAGCACCCCTCATCTTTTCCCAAGCCCTTAAGCAAGAGTTGCAGTTATACCTTTCT--CTCCTCTCTATCTTATGAAT  
GGAGACTATTGTATTGCTGAGACTGAGACATGCTTTGCAGTGCTAGAATAAAA-GACCTTGTAGGCTGACTCAATACCT  
CCCACCCCTCGCACCTTGATCTTATTTTA-GTGTGAAATGCTTACCTCACTTGTAGTTTACAAAATGCTTTCACCTAAGAAT  
ACATTTTCTCCTCATCTTTGATTCTTATATTTCCAGGTTTTTAATTGTGAATTTCTATCTTAATGTTTTTATACAGTGGG  
CTTCTCCTTCACCAC-AGCAGCCTCTCACTCTCACATTT-ACTTAGTAGTTCCAGTTTCTG-----AAAATAG  
AAT-----

-----AACATTGTGATTTTCTATGACATTTGCTTAT-GGTT-AGCCAATAGTGGGTT  
TTCTGAGCA--TTTTCATCATCTCATTAAGATAGCAAACACGTGGTGGTGA--TGTTCAATTTCTTT-----  
-----AGTCCTTGCTATATGAATGTAAAATTGAAA--GTGATCATCTTTCTTTACCTAATGAT--CTCT  
TAAGAAGGGGACATATAAAGATT---TTGCTTATCAGTCTGATGAA-----



-----TGAGAGAGTGAAGTTTTGATTTCT-----GATGATACTCATGCTAATACTTCTGAATTATCTCTAT  
AATC-----  
>Scr  
-----CTAATCTACAATTTCT-----  
-ACTTTCCTGACAAGAGTATCCATGTTCAAGGCAAACAAAAACACAACCTGAAGTATA-T--AACGATAA-----CCAAAT  
AGAAAAAGTACTATTATCCTGTGAGATGGACATTGGTAATATTTTTCTGGCCCTAGGGTTATTGAAGAAGTTCATTGTCT  
C-----TGCCCTG-----AAAAAATTTTTTGGCTTTTTTTTTTTTTTTGAGACAATTGGGGTTAAGTGACTTGC  
TCAGGGTCACACTGCTAGGAAGTGTAAAGTGTGAGAGATCAGATTTGAACTTCAGTCCTCCTGACTTCAAGGCTGATGCT  
CTAT-----TGCCCTG-----AAATACTTATTTTTGCCCTT-----AAAAAAACCCTTTCACATTGTATCTT-----  
-----AAGAATTGTGATATAATTTTCAGTAACTAAGTTGATCAGAATGAGTACTAAGAA  
ATTCTC-----CTTCTAATGACAA-----  
-----TTTGGG  
TACAGTATTGAACTTTTT-GCCTCCTACATAATTG-TTCCAGGAAAATAGTCTA-----  
-----TGAGAGAGTGGAGTTTTGATTTCT-----GATGATACTCATGCTAATACTTCTGAATTATCTCTGT  
AACCT-----GCTCTTTGACTTA-----AGTATGACG-----  
>Mfa  
AATCCTGACCARAAAGATTCTGATGGT-----GAGTCACCTAATCTATAATTTCT-----  
-ACTTGCCTGACATGAAAATCTATGTTCAAGGCAAACAAAAATACCACTGAAGTATT-G--AACAGAAATAGAATAGAAT  
AGAAAAAATATTATTATCCTGTGAGGTGGACATTGGTAATATTTTTCTGGCCCCGGGGTTATTAAAGAAGTTCATTGTCT  
T-----TGCCCTG-----  
-----  
-----AAAATGTTTTATTTTTGCCCTT--AAAAAAATTTTCACATTGTATCTT-----  
-----AAATAGTGTGATATAATTTTCATTAATTTAGTTTACTAGAATGAGTACTAAGAG  
ACTCTCA-----CTTCTAATGACAA-----  
-----TTTGGT  
TGCCTATTGAACTTTTT-GCCTCCTACATAATTG-TTCCAGGAA---TTTCTA-----  
-----TGAGAAAGTAGAGTTTTGATTTCT-----GATGATAGTCATGCTAATACTTCTGAATTATCTCCAT  
AATCTTTATAATCTTTTTTTGACTTT-----AGGTGATGGACGAGGGGAT  
>Iob  
-----  
-AATTTTCCTGACATGAGTATCCATGCTAAAGACAAACAAAAACACAACCTTATAAATA-TATAACAATAA-----TCAAAT  
AGGAAAAATACTATTATGCCATGAGGTGGGGTCTTGTAAATATTCCTGACCTCAAGATTATAAAAAGGGATTCATCGTAT  
C-----TGCCCTG-----  
-----  
-----GAAA---TATTTTTGCCCTTTT--AAAAGTCTTTCACGGTGTATCTTTTTTTTTT  
TTTTTTTTAAATTTTCACACTGTAACCTC---AGTGTATATATTAAGTTTATTAGAAAAGAGGACTAAGAA  
ATTCTCA-----TT-----AAGGGGCATCTAGGTGGTGCAGTGGAGTAGGGAGCA---  
-----CCTGAGTTCAAATCCAGCCTTAGACACTTAATAATTGCCTAGCTGTGTGACCTTGGGAAAGTCACT  
TACACCTATTGCCCTTAAATAAAAATTTCTAAAAAATAAAATTATCA-----CTTCTACTGAAA-----  
-----TATTGAACTTTTT-ACCTCCTACTTAATTGATCCCAGGAAAATAAATCTA-AAAGATTTAAGAAGAAGAAATTA  
GGAATAA-----TAAAGGAGAGGGGTTTTGATTTTTT-----AGATG-AGGTCATGCTAATGCTTCTGAATTATCAATGT  
GAT-----  
>Mla  
-TCACTGCCCC-----ATAGGGG  
TACTTCCCTGACATGAGTT-CCATGCTAWAGACAAACAAATA--CARCTGAAGTATA-T--AACASTAA-----TCAAAT  
AGGAAAAATACTATTATCCCATGASGTGGGGACTTGTAAATATTCCTGACCCCAAGATTATAAAAAGGGATTCATTGTAT  
C-----TGCCCTG-----  
-----  
-----GAAA---TATTTTTGCCCTTTT--AAAAGTCTTTCACATTGTATCTTTTTTAA  
---AAATAAAT-TCACATTGTAACCTA---TGTGTGATATAAACAAGTGTAGATAAGTTTATTAGAAAGGAGGACTAAGAA  
ATTCTCA-----CTTCTACTGAAA-----  
-----TTTGGG

TGCAATATTGAACTTTTTTACCTCCTACTTAATTG-TCCCAGGAAAAGAAATCTATTAAGATTTAAAAAG---AAATTAA  
GGAGCAATAAAGTAAAGGAGAAGGGTTTTGATTTTTTTAGAGAGAGAGAGGTCATGCTAATGTTTCTGAATTATCAATGT  
GATCTTCTC-----TTTTTGATTTTC-----AGGTGATGGACGGGGGGAT

>Meu

AATCCTGACCAGAAAGATTCTGATGGT-----GAGTGACCATCTTCACTACCACTACCACTTTCACAGAGG  
TACTTTCCGGACATGAGTTTCCATGTTCAAGGCAAACAAAAACACAACCTGAAGTACA-T--AACAATAA-----GCAAAT  
AGGAAAAATACTATTATCCAGGGAGGTGGGCATTTGTAATATTCCCTGGCCCCAGGATCATGAAAGGGTTCCATTGTAT  
C-----TGCCCTG-----

-----GCAA---TATTCTGTCCTTTTT--AAAAATCTTCACGTTGTATCTTAAATA--  
-----GTGTGATATAATCCTGGTAAATAAGTTTACTAGAATAAGAACTAAGAG  
ATTCTCA-----TTTCTAACAACAA-----

-----TTTGGG  
TACAATAATGAACTTTTT-GCTTCTTACCAAATTG-TCCCAGGAA--GTTTCTG-----  
-----TAAAGGAATAGAGTTTTGATTTCT-----GAGAGCAGTCATACTAATGCTTCTGAATCATCCTTGT  
GATCTTCTC-----TTTTTAACCTC-----AGGGGATGGACGGGGTGAT

>Mdo

AATCCTGACCAGAAAGATTCTGATGGT-----GAGTGACCTAACCTACCATTTC-----  
-----CATGCTCAAGGCAAACAAAAACACAACCTGAAGTAAAAATAAACA-----  
-GGAAAAATACTGTTATCCTGTGAGAAGGGCATTGTAATAGTCCCTGACCCAGAATTATAAATGGGGTTCCATTGTAT  
G-----TTCCCTG-----

-----GAAA---TCTTTTGCCCTTTT-AAAAAGATGTTTACATTTGATCTAAAGTA--  
-----GTGTGAGAGAATACTGACACATAAGCTGATTAGAATGGGAACTAAGAG  
CTTCACA-----CTTCAAATGACAA-----

-----TTTGGG  
TGCAGGATTGAACTTTTT-GCCTCCTACCTAATGA-TCCCAGGAAAATGAATCTA-----  
-----TAAAGGAGGAGGGTTTTGAATTTT-----GAGAGCAGTTATGCTAATGCTTCTGAATTGTCCCTGT  
GA-----CC-----TTTTTGCCCTC-----AGGCGATGGACGGGGAGAT

**MARKER 12**

>WSINE1

-----  
-----  
-----  
-----GAGGGGCAGCTAGGTGGTGCAGTGGATA  
GAGCACCAGCCCTGGAGTCAGGAGGACCTGAGTTCAA-----TCCAGCCTCAGACACTTACTAGCTGTGTGACCCTG  
GGCAAGTCACTTAACCCCAATTGCCTCAAAAAAAAAAAAAA-----  
-----  
-----  
-----  
-----  
-----  
-----  
-----  
-----  
-----  
-----  
-----

>MIR3

-----  
-----  
-----  
-----  
-----  
-----TGGGCA  
AGTCACTTAC-----CTCT---CTGGG-CCTCAGTTTC-CTCATCTGTAAAATGAGGGGGTTGGACTAGATGA-TCTCT  
AAG-GTCCCTTCCAGCTCTGACATTCTATGATTCTATGAT-----  
-----  
-----  
-----  
-----  
-----  
-----  
-----  
-----  
-----  
-----  
-----

>WSINE1

-----  
-----  
-----  
-----  
-----  
-----  
-----  
-----  
-----  
-----  
-----  
-----  
-----AG  
GGCAGCTAGGTGGTGCAGTGGATAGAGCACCAGCCCTGGAGTCAGGAGGACCTGAGTT---CAAATCCAGCCTCAGAC  
ACTTACTAGCTGTGTGACCCTGGGCAAGTCACTTAACCCCAATTGCCTCAAAAAAAAAAAAAA-----  
-----  
-----

>Sha DB

TATAGAGAAATTATGAAGGT-----ATGGCTATAAAAGATG-----CTTAGCTGTCAGTGT  
GTTAAATAAATTA--GTTAAATTATATAAAAATGAAATTAAACTGTATATAAAGACAGATTATTTCCCTGAATAACTACAA  
CTGTGAACAAA-GGCAA-----TCCCTTTCTCTTCAGG-TTCAAAAACAATCATTTAAACCTCTTGATTTTACAGTAA  
GTGCCATTACTTGCT-----AAAAATGAT-----TGGGGGTGGGAGAACTAGATGGTACAGTGGATA  
GA-----GCAGTTGGGAGGACCTGAGTTCAAATGTAGTCTCAAACACTTAATAGTTGCTAGCTGTGTGACCCTA

GGCAAGTCACTTGACCCCAAATGCCTCACCAAAAAAAAAAAAAAGT-----AAAAATGAT-----GGGGGATCCTA  
AGGTAAATCAC-----CTCT--AAGGA-CAATAGTTTTCTTATTTTTTAAATTAAGGAGTTTGGATTAGA----TATCT  
-AG-TTCCTTTTCAGCTCTGATTGAATGGGTGCCTAA-TAA-----TTTGAAATAAGTTATAAAACATATTTTCAG  
ATAAACTGTAGAAGCAGTGTATTTATTTATTTGAATACGTAACCTAAGTTAATGTTTGGTAAACCTAAATTTAAATATGCT  
ACAATAAATTAGGGAAAATTGTAATCTGGTATCCCTATAGTGAACCTGTACTAGAATTATCATTAGAATTTCTGCTACAT  
AAATCCTTATATTCATTTTTTCAGAGCAGACTTTGTCTTGCTTTTCAG-ATTTAAG-----ATCAGTGG-----  
-----

-----TAATGTTATTA--GGGCAAAATGAAATTCCTAATAACTTTTTTTTATTATAT  
T-----AGATCTGTGAAGATTAT

>Dge

TATAGAGAAATTATGAAGGT-----ATGGCTATAAAAAGATG-----CTTAGCTGTTAGTGT  
GTTAAATAAAATTA--GTTAAATTATATAAAAAATGAAATTAAACTGTATATAAAGACAGATTATTTCTGAATAACAACAG  
CTGTGAACAAA-GGCAA-----TCCCCTTTCCTTCAGG-TTCAAAAACAATCATTTAAACCTCTTGATTTTACAGTAA  
GTGCCATTACTTGCT-----AAAATGAT-----TGGGGGTGGGGAGAACTAGATGGTACAGTGGATA  
GA-----GCAGTTGGGAGGACCCGAGTTCAAATGTAGTCTCAAACACTTAATAGTTCCCTAGCTGTGTGACCCCTA  
GGCAAGTCACTTGACCCCAAATGCCTCACCAAAAAAAAAAATAA-GT-----AAAAATGAT-----GGGGGATCCTA  
GGGTAAATCAC-----CTCT--AAGGA-CAATAGTTTTCTTATTTTTTAAATTAAGGAGTTTGGATTAGA----TATCT  
-AG-TTCCTTTTCATCTCTGATTGAATGGGTGCCTAA-TAA-----TTTGAAATAAATTATAAAACATATTTTCAG  
ATAAACTGTAGAAGCAGTGTATTTATTTATTTGAATACATAACTAAATTAATGTTTGGTAAACCTAAATTTAAATATGCT  
ACAATAAATTAGGGAAAATTGTAATCTGGTATCCCTATAGTGAATTTGTACGAGAATTATCATTAGAATTTCTGCTACAT  
AAATCCTTATATTCATTTTTTCAGAGTAGACTTTGTCTTGCTTTTCAG-ATTTAAG-----ATCAGTGG-----  
-----

-----TAATGTTATTA--GGGCAAAATGAAATTCCTAATAAATTTTTTTTATTATAT  
T-----AGATCTGTGAAGATTAT

>Mfa

-----ATTTCTTGAATAAGAAC--  
-TGTGAACATAATGGCAGA----TCCCCTTTCCTTCAGT-TTCAAAACCATCATTTAAACTTCTTGATTTAACACTAA  
ATGCAATTACTTGCT-----TAAAATGAT-----TGGGGTTAGGAGGCAACTAGATGGTGCAGTAAATA  
GCATACTGGCCCTGAAGTTGGGAGGACCTGAATTCAAATGTCGTCTCAGATGCTTAATAGTTCCCTAGCT-TGTGACCCTG  
GGCAAGTCACTTGACCC-AAATGCCTCATCAAAAAAAAAATAAAAT-----AAAAATAAT-----GGGGGATCCTA  
GGGTAAATCAC-----CTCT--AAGGA-CAATAGTTTTCTTATTTGTTAAATTAAGCAGTTTGGATTAGA----TATCT  
-AA-TTCCTTTTCAGTTCTATTTGAATGGGTGCTAA-TAA-----TTTGAAATAAGTTATAAAACATAATTTAG  
ATAAATTGTAGAAGCAGTATTTATTTATTTGAATACATAACTAAGTTAATGTTTGGTAAACCTAAATTTAAATATGCT  
ACAGTAAAYTAGGGAAAATTATAATCTGGTACCCTTAAAGTGAACCTGCATCAGAATTATCGTTAGAATTTCTGCTACAT  
AAATCCTTATATTCATTTTTTCAGAGCAG-CTTTGTCTTCCTTTTCAT-ATTTAAG-----GTCAGTGG-----  
-----

-----TAATGTTATTA--RGRCAAGATGAAATTCCTAATAAGT-----

>Iso

-----AATTAAATTTTATGCCTAATTAATTATATACAATGACAGATGATTTCCCAAATAACA--GT  
ACCTGAACTGATAGAAAA----TCTCTTTCTCTTTAGTTTTCAAAAACAGTAACTTATGTCTCTTGATTTAGACTTA  
ATGCCATTATT-ACTCA-----GGGTGCTGA-----

AGGCAAATCATTTCCCCTCT--GTGGG--AAATATATTTCTTTTTTATAAAATGAGGAGTTTGGATTAGA----CATCT  
TAAATTCCTTTCTAGCTCTAATTATATGGGTATCTAAATAA-----TTTGAAAAACATAATTCAGATAAT----  
-----CTGTAGGAGC--TGTTTTATTTATTTGGATG-----AATATAAATCTTTTAAAGCATAAT  
ATAATAAATTAGGGAAA--TTATGATATGGTACTTCTATAGAGGACCTGTGCCAGAATTACCATTGGAATTTCTGCTACAT  
AAATACTCATGTTTCATTTTTTCAGGACAGACTTTAAATTTCTTTTTTCATATTTAAC-----ATCAGTGG-----TA  
GGGCAGCTAGGTTGCCAGTAGATAGAACCAGCCCTGGAGTCAGGAGGACTAGAGTTTTCTGGAGACCAAATGTCCAG



CCTTA-GACCTGTATGACATTGGGCGAGTTGTTTAACCCCATTTGCTTTGCTAAAACCAAAAAAGAAAAAAAAAAAAAAAA  
AAG-----ATCAGTGGT-----AATAGT-ATTATTAGGGCAAAATCAAATTTCTCA-----

>Mdo

TATCGAGAAATTATGAAGGT-----ATGGCTATAAAAAGATGCTCAGTAATCAATGTTTTTAAATTATTA-  
--ACATCAGTGATTCCTTGAAATTAAATTGTATGCCTAATTAATTACAT-----ACAG-TGATAGATTATTATTCAAATA  
ACTATAGCTG-TAAACTAATGGGTGGTTCC--TTTTCTGTTTTCAAAAAATAATAATTTAGGCCTTTGGATTTTACTTA  
ATGCTATTTATTACTACTA-----AAACTGGTTA-----

-----AGTGCCTA  
GGGCAAATTATCTCACCTCTCTCTGCGAGCAATAGTTTTCTTATTTGTAAAAT-GATGTGTTTGGATTAGTTTTGGATTA  
AA-GTTCCTTCCAGCTCTAATTATATGGGTATCTAAATA-----TTTGCAATGAGTTATTAACATAATTCAG  
ATAACCTGTATTATCAATGATTATTTATTGAA--CCT--CTAAGTAAACATTTGGCAAACATAAATCACTTAAATATGAT  
ACA----AGTAGG---AATTATTATATGATACTCCTATAGTAAATTTGCATTGGAATCGTCATTGGAATTTCTGCTACAT  
GAATCTTTGTTTTATTTTACGGAGCAGACTTAAATCTTTATTTGTAAATTTAAG-----ATCAGTTG-----

-----TGATAGT-GCTATTAGGACAAAATGAAATTCCTAATACGTTTTTTGTT-ATAT  
T-----AGATCTGTGAAGATTGT



TTGAACTTAGGTCCTCCTGACTCTAGGGCTGGGACTCT-ATCTGCTGTGCCATCTAGCTGCCC-----ATAC-----TCT  
TTC-----AAATAATTCAGGAATTCT-GTTTCAGTATCTCTGTCATCTGAAAGCTTCTCTA--TTTGAACATCTC  
TGATAATAAAGA-TCACTCT--TTATGTCACACT-ACAACCTGTTCCATTTTTCTTATCATTGTTTCC-AAGTGATTAT  
GGAGAATTTCTTT----GCT-TGGAATTTCCCTACTTACAAA-GTGGTT-AGATTCTATAGAACTTAAGATACGAAGGT  
AAAGGGCTTAGAAGTCACTGGGGGAAAGTTCCAAAGACTAGGTTTTACCTGATG-TCCTCTTTAT-----  
-AGA---TCTCATCGAAGC-----

>Scr

AGAAGTTAAAAGAGGAACACCGTCATAGAGCCAAGGT-----CAGAGGCTGGAAAATGAATTTGGAAA-G  
TGTGATTGAGAAGCTTTT--GTGTACC-----TATTACAACATCTTT-----  
-----CTAGTTGGGTTTTGGAATACTAGAATTTGATTTATAGTATCTTAAATTCTGAAAAATACTTAGG-TCAT  
TTAGG-----TCTTTT-----TTTCTTTTCTTTTCTTTTATTT  
TT-----CCCGAGGCAATTGGGGTTAAGTGACTTGCCAGGGTCACACGTC TAGGAA-----GTGTCTGAGGATGTAT  
TTGAACTCAGGTCCTCCTGACTCCAGGGCC-----TATCTACTGTGCCATCTAGCTGCCTCTGGTTTGC-----TCT  
TTC-----AAATAATTCAGGAATTCT-GTTTCAGTATCTCTGATATCTGAAAGCTTCTCTA--TTTGAACATCTC  
TGATAATAGAGA-CCTCCCT--TTATGTCACACT-ACAACCTGTTTGTATTTTCTCATCATTGCCTCC-AAGTGATTAT  
GGAGAATTTCTTT----GCC-TGGAATTTCCCTACTTACAAA-GTGGTT-AGACTCTATAGAACTTAAGATATGAAAGT  
AAAGGGCTTAGAAGTC-----

>Mfa

AGAAGTTAAAAGAGGAACACCGTCATAGAGCCAAGGT-----CAGAGGCTGGAAAATGAATATGGAAA-G  
TGTCACTGAGAAGCTCTTG--TTTKCC-----TTTTAGAACCCTCTTT-----  
-----CTAGTTGTATGTGGAATATTAGAATTTGATTTATAGTATTTTAAATTCTGAAGATTCCTTAGG-TCAT  
CTAGGTTAG-----TCTTTC-----  
-----  
-----AAATAATTCAGGAATTC--TTTTAGTATCTCTGACATCTGAAAGCTTCTCTA--TTTGAACATTTCT  
TGATAATAGAGA-CCTCTCT--TTATGTCACACT-ACAACCTGTTCTGTTTTTCTCATCATTGCTTCC-AAGTGATTGT  
GGAGAATTTCTTT----GCC-TGGAATTTCCCTACTTACAAA-GTG-----AACTAAGATGTGAAGAT  
AAAGGGCCTTAGAAGTCACTGGGGAAAAGTTCCAAAGACTAGGTTT-CACCTGAAGTTCTTTTTTAT-----  
-AGATTCTCAACCTGAAGCTACGTGAGGCT

>Pgu

AAAAGTTAAAAGAGGAACATCGTCATAGAGCCAAGGT-----CAGAATCTGGGAAAATAAATATGAACA-G  
TGTGACTGAGAAGTTCTTGTGAGTCATTTTATTTTCTTTTTAGAACCTCCCC--ATGAGACTATTGTAGTTATTAGGGTT  
CTGGGTA---GGC-----AGTGAATATTAGAATTTGATATATAAACTCTTAAACTCTGAAGAATCCTTAGGTTTCT  
CTAGTTGAA-----TCTTTC-----  
-----  
-----AATGCAGGAATTCCTGTTTTATCAATCCTGACATCTATCAG--TCTCTG--TTTGAATACCTC  
TGATGATAGAAGTATTCTCTC--TTT-----

>Iob

AAAAGTTAAAAGAGGAACATCGTCATAGAGCCAAGGT-----CAGAATCTGGGAAAATAAATATGAATA-G  
TGTGACTGAGAAGTTCTTGTGAGTCATTTTATTTTCTTTTTAGCACCTCCCC--ATGAGACTATTGTAGTTATTAGGGTT  
CTGGGTA---GGC-----AATGAAATAYTGAATTTGATATATAAACTCTTAAACTCTGAAGAATCCTTAGGTTTCT  
CTAGTTGAA-----TCTTTC-----  
-----  
-----AATGCAGGAATTYCTGTTTTATCAATCCTGACATCT-----CTCTG--TTTGAATACCTC  
TGATGATAGAAGTATTCTCTC--TATGGCATAGTA-CAACTGTTCTGTGTTTCTCACCATTGGCTCT--ACATGATTCT  
TGAGAATTCCTTTCTATGCCTTGAGCTTTTCCCTACTTATAAAA-----ATAGAACATAAGA-TGT-----  
AAAGG-CCTAGAA-TCATTGGACAGAATTTCCAAAGACCGGGCTTTAAGTTGATGGACCATTTTGT-----  
-AGATCCTCAACCTAAAGCTTCGTGAGGCT

>Mla

AGAAGTTAAAAGAGGAACATCGTCATAGAGCCAAGGT-----CAGAATCTGGGAAATGAACATGCATA-G  
TGTGACTGAGAAGTTCTTGTGGGTC-----ATTTTATTTTTAGAACCTCCCC--ATGAGACTGTTGTAGTTATTAGGGTT  
GTCCTGGGTGGGC-----AGTGGAATATTAGAATCTGATATATAAACTCTTAAACTCTGAAGAATCCTTAGGTTTCAT  
CTAGTTAAA-----TCTTTC-----

-----  
-----AATGCAGGAATTCCTGTCTTAGCAACCCTGACAGGTATCAGTCTCTCTG--TTTGAATACCTC  
TGATGATAGAGATGTTCTTTC--TATGGCATAGTAATAACTTGTACTGTTTTCTCACCATTGACTCT--ATATGATTCT  
TAAGAATTCCTTTCATGCCTTGGAGCTTTTCCTACTTTTCAA-----GTAGAACATAAGA-TGT-----  
AAAGG-CTTAGAATTCATTGGAGAGAGGTTCCAAAGACCAGACTTTTATTTGATGT-TTATTTTGT-----  
-AGATCCTCAACCTAAAGCTACGTGAGGC-

>Meu

AGAAGTTAAAAGAGGAGCATCGTCATAGAGCTAAGGT-----CAGAGGCTTGGAATGAATATGGATA-G  
TGTAAGTGAAGAAGCTCTTGTGGATCATTGTGTTTCACTTTTATTACCTTCT--ATGAGACTATTGTAGTTGGTAGGC--  
-----AGTGGAATACTAGAATTTGATTCATAGAATCTTAAATTCTGAAGAATCTTAAG-TCAT  
CCAGTTTAA-----TCTTTC-----

-----AAACAGTGCAGG---TGCTGTTTCAGCATCCCAGACATATCTATCAACCTCTCCATTTGAACACCTC  
TGATGGTAGAGA-CCTCC-----ATGTCACAGTA-TAATCTGTTTTGTTTTTCTCACTGTTGTTTCT--GTGTGATTCT  
GGAGAATCCCTGCTTTGCCCTGGAGCTCT-CCAAGCTTT-----ATAGAATTTAACATATGAAGGT-----  
AATGGGCTTAGAAATCATTGTAGAGAAGTTCCAAAGACCAGGCTTCTCCTGATGGCCCTCTTTGT-----  
-AGATCCTCAACCTGAAGCTGCGTGAGGCT

>Mdo

AGAAGCTAAAAGAGGAACATCGTCATAGAGCCAAGGT-----CAGAGACTAGGAAATGAATATGGATA-G  
AGT---GAGAAGATTTTATAGGTCATTTTGTTTACTTTTTAGAACCTCTCT--ATAA-----GGTAGCAGT  
GTCCTGGGTGGGT-----GGTGGAATGCTAGAATTTGATTCATAGAATCTAGGTGACTTAAGGATTCCTTAG-----

-----AAT-----TCCTGCTTCAGCAACCATGATTTCTGC--TAGTCCCTCCATCTGAACACC--  
TGATGATGGAGA-CCTCTCTC--TAAGTAACGATA-CAACCTGTTCTATTTTTCTCACCATTGGTTCT--GTGTGACTCT  
GGAAAACCTCATTCTCTCCCTGGAGCTCTCCTTTT-TATGA-AATGGCTATACTTCATAGAACTTGAGATATGAAGGG  
AAAGGGCCTAGAAATCATTGGAGAAAGGTGCCAAAGACCAAGCTTTCACTTGATGGCCCTCTTTGT-----  
-AGATTCTCAACCTGAAGCTACGTGAGGCT



-----  
-----AGGTGAAGTTAAGATTAGAGCTGTAGGAAGCCTCTAGCTAAGT  
GAAAGTACCACAATGCCA-ATTTTGCCACAGCAAGCACCAGAGGAGAAAGA-----CCTTGAGGGCCC-TG  
TGGATCCCTGGTAG-TATCTTGAGCCCTTCCAGCAGTGCC-TTTGCCCTATCTAAGCTCTGGTTCTGATAGTGATAGAC  
CATGTCTG---TTTGTGG-ACTTGTGTCAGG-----CAGATGCCACACGCTGCTCCTGGAAAATGGGCGAT  
TC

>Pgu

TGCTCCAGGT-----GGGTAGGCCCTGGAGGGACTAGTGATTTCAAGAGAATACTTTTCATCTTTCTGTTA  
ATCTAGGTCCCCTCTTTTTACTTCAAT-ACCAATTTCT-GGGTCCAGGGAGATTATCTTGGGGTCTGCAACAAGACAGAA  
GAATGATGTTTCT-TTATGCAGAACCTCAGAGTTTCATAATAG-----  
-----TTTCCCTTG--CACTGTGGGTTTGGCATACTTTGGCAATGTGCCTGG-----AAAAG-----  
-----

-----AGACGAAGCTAAGGTTAGGGCTTTAGGAAGGCTCTAGCTGAGT  
AGAAGTACCTCATTGCCA--TGTGCC-CTGAAGGCATCAGAGGAGAAAGA--TGTATTCTGAGCCTTGGAAAGCCT-TG  
TGGATCCATGGACGGTATCTTGGT-----GGTGCC-TGTG-CCTATTTGAGG-----TCT-ATAGTGATGAAT  
GGTGTCTT---GTTCCTGCAATTGT-ARG-----AAGATGCCCC-TCTGTGCTACTGGAGAATGGCCGGT  
TC

>Iob

-----GAGGATAGTGATTTM-AGAG-ATACTTTCATCTTTCTGTTA  
ATCTAGGTCCCCTCTTTTTACTTCAAT-ACCAATTTCT-GGGTCCAGGGAGATTATCTTGGGGTCTGCAACAAGACAMAA  
GAATGATGTTTCT-TTATGCAGAACCTCAGAGTTTCATAATAG-----  
-----TTTCCCTTG--CACTGTGGGTTTGGCATACTTTGGGAATGTGCCTGG-----AAAAG-----  
-----

-----AGACAAAGCTAAGGTTAGGGCTTTAGGAAAGCTCTATCTGAGT  
AGAAGTACCACAGTGCCA--CAGTGCC-CTGAAGGCATCAGAGGAGAAAGA--TGTATTCTGAGCCTTGGAAAGTCT-TG  
TGGATCCATGGGTGGTATCTTGGT-----GGTGTC-AGTT-CCTATCTGAGG-----TCT-ATAGTGATTGTT  
CAT-----GGAATTGT-AGG-----AAGATGCCACACGCTGCTCCTGGAGAATGGCCGGT  
TC

>Meu

TGCTTCAGGT-----GGGTAGACCCTGGAGAGTCTCGTGATTCCATGAGAATACTTTTCATATTTTCAGCTA  
AGCTAGATCCCCTCTTCTTATTTCACT-GCCAATTTCT-GGGCCCAGGG--ATTATCTTGGGGTCTATGACTAGGCAGAG  
GAATGATGTTTCC-TTATGTAGCACCTCAGAAATTTTCAT-----GA  
GGGTCTCCCTTGCCCCCTGGTGCACAGTG--TTTGACAGCCTCTAGGAATGTACCTGG-----AAGAG-----  
-----

-----TGGCAGA-----TTAGGGCTGTAGGAAGCTTCTAACTGAGT  
AGAAGT-----GCTG--CAG-----AAGGCACTAGAGGAGAACATTATGTATCATGGGCCTTGCA-GGCC----  
-----CTATGG-TAGTATCTTGAGCCCTCT-CTGGCAGTGCCAATGCCCTTTCCGAGCTTTGATTCTGATAGTGATGC-A  
C-TGTGTCTGTCTGTGGACTTGT--CAG-----CAGATGCCACACCCTGCTC-TGGAAAATGGCGG-T  
TC

>Mdo

TGCTCCAGGT-----GGGTAGGCTCCAGAGGGACTAGTGATTCCAAGAGAATACTTTTGTATTTTCAGCTG  
AGCTAGGTTCCTCTCCTTATCCCAGC-GCCAATTTAT-GGATCCAGGG-----TATTCAACCAGGCAGAG  
GAATGATGCTTCC-TCATGAAGGACCTTGGACTTTTACA-----CA  
GGGTCTTCTTTACCC--AGTACATGGTGG-TTTGACATTCTCTGGGAAGGTGTCTGG-----AAAAGA-----  
-----

-----AGGCAGTGCTTAGGATAGGGCTGTAGCTTCTAGCTAAGTGAA  
ATATTTTCAGCACTGGGGAAATTTT-----CTCTGGAGGAGAAAGTTATATATCCTAGGCCTTGGAAAGCCCTGT  
GG-ATCTATGGATGGTATCTTGGGCCCTCT-ATGGCAGTGCCAATGCCCAATCTGAGCTCCAGTTCCAGTACTGAAGAAC  
CATGTCTCTTT--GTGGGCTTGT--TAGG-----CAGATGCCACACGCTGTTTCTGGAGAATGGGCGGT  
TT

**MARKER 19**

>WSINE1

-----  
-----  
-----  
-----GGGGCAGCT-AGGTGGTGCAGTGGATAGAGCACCAGCCCTGGAGTCAGGAG  
GACCTGAGTTCAAATCCAGCCTCAGACACTTA-----CTAGCTGTGTGACCCTGGGCAAGTCACTTA-ACCCCAATTG  
CCTC-AAAAAAAAAAAAA-----  
-----

>Sha DB

ATAATGAGGT-----GAGTACTTAAATAACTTCCTGGCACCAGAATTGTA-TTAGGAAAAAAAA-TTCTGG  
AAGTTTATTTT---AATGAATAAGAGAAACAT-GATTTTTTTTTTTTAAATGGCTTTTATTTTTTAAATTACCATA-TTGT  
GAAATCTATCCAAACTCT-GCCTTAGTTTCAGTTCCTGTCTTATA-CATGAAGTATTTG--TGGTTGGCCAGTCTTAA  
GAAGAGGC-----TTACAT-----AGGGCAGCT-CGGTGGTGAATGGATAGAGCACCAACCTGAAGTCAGGAG  
GACCTGAGTTCAAATCTGACCTCAGACACTTAACACATCCTAGCTATGTGACCCTGGGCAAATCACTTA-ACCCAGTTG  
CCTC-AGGAAAAAAAAA---GACC-----TACAAT-----ATCTTACTAGTTTTTAGGCCATCTAAAAGAAATT  
CTAATTGTCTAATATAGAATCTCAGAGGTTATAAATTATAATTATGTT-ATCTTACTAT-----GTTAGGACAGTTTTT  
ACCTTGATTTCTTTATAATAATAATTAGATCGCAGCTCAGATCTGT

>Sha CPH

-----TGTA-TTAGGAAAAAAAA-TTCTGG  
AAGTTTATTTT---AATGAATAAGAGAAACAT-GATTTTTTTTTTTTAAATGGCTTTTATTTTTTAAATTACCATA-TTGT  
GAAATCTATCCAAACTCT-GCCTTAGTTTCAGTTCCTGTCTTATA-CATGAAGTATTTG--TGGTTGGCCAGTCTTAA  
GAAGAGGC-----TTACAT-----AGGGCAGCT-CGGTGGTGAATGGATAGAGCACCAACCTGAAGTCAGGAG  
GACCTGAGTTCAAATCTGACCTCAGACACTTAACACATCCTAGCTATGTGACCCTGGGCAAATCACTTA-ACCCAGTTG  
CCTC-AGGAAAAAAAAA---GACC-----TACAAT-----ATCTTACTAGTTTTTAGGCCATCTAAAAGAAATT  
CTAATTGTCTAATATAGAATCTCAGAGGTTATAAATTATAATTATGTT-ATCTTACTAT-----GTTAGGACAGTT-TC  
ACCTTGATTTCTT--AT-----

>Dge

-----CTGGCACCAGA-TTGTA-TTAGGAAAAAAAA--TTCTGG  
AAGTTTATTTT---AATGAATAAAAAGAAATAT-GATTTTTTTTW---AATGGCTTTTATTTTTTAAATTGCCATA-TTGT  
GAAATCTATCCAAACTCT-GCCTTAGTTTCAGTTCCTGTCTTATA-CATAAAGTATTTG--TGGTTGGCCAGTCTTAA  
GAAGAGAC-----TTACAT-----AGGGCAGCT-CGGTGGTGAATGGATAGAGCACCAGCCCTGAAGTCAGGAG  
GACCTGAGTTCAAATCTGACCTCAGACAC--AACACCTCCTAGWTGTGTGATTCTGGGCAAATCACTTA-ACCCCAATTG  
CCTC-AGGAAAAAAAAA---GACC-----TACAAT-----ATCTTACTAGTTTTTAAAGCCATCTAAAAGAAATT  
CTAATTGTCTAATATAGAATCTCAGAGGTTATAAATTATAAKTATGTT-ATCTTACTAT-----GTGAGGACAGTT-TC  
ACCTTGATTTCTT--ATAATAATA-----

>Pap

ATAATGAGGT-----GAGTGCTTAAATAACTTCCTGGCACCAGAATTGTA-TTAGGAAAAAAAA-TTYTGG  
AAGTTTATTTT---AATGAATAAGAGAAACAT-GATTTTTTTTTT---AATGGCTTTTATTTTTTAAATTACCATA-TTGT  
GAAATCTATCCAAACTCT-GCCTTAGTTTCATTTCTGTCTTATA-CATAAAGTATTTG--TGGTTGGCCAGTCTTAA  
GAAGAGAC-----TTACAT-----AGGGCAGCT-CGGTGGTGAATGGATAGAGCACCAGCCCTGAAGTCAGGAG  
GACCTGAGTTTAAATGTGACCTCAGACACTTAACCTTTCCTAGCTGTGTGATCCTGGGCAAGTCACTTA-ACCCCAATTG  
CTTC-AGGAAAAAAAAA---GACC-----TACAAT-----ATCTTACTAGTTTTTAAAGCCATCTAAAAGAAATT  
CTAATTGTCTAATATAGAATCTCAGAGGTTATAAATTATAATTATGTT-ATCTTACTAT-----GTTAGGACAGTT-TC  
ACCTTGATTTCTT--ATAATAATAT-----

>Af1

-----AGA-TTGTA-TTTGGAA-GAA-TTCTCG  
AAGTTTACTTTTTAATTGAATAAGAGAAACATTTGATTTTTT-----AAAAAATTTACCATATTTGT  
GAAGTCTAT-CAAATCTCT-GCCTTAGTTTCAGTTCCTGTCTTATA-----AAGTATTTG--TGGTTGGCCAGTCTTAA  
GAAGAGAC-----TTACAT-----GGGGCAGGTACGGTGGTGAATGGATAGAGCACCAGCCCTGAAGTCAGGAG  
GACCTGAGTTCAAATGTGACCTCAGACACTTAACACTTTCCTAGCTGTGTGATCCTGGGCAAATCACTTA-GCCC-AATTG  
CCTC-AGGAAAAAAAAAAAAA--TC-----TACAAT-----ATCTTACTAGTTTTTAAAGCCRTCTAAAAGAAATT  
CTAATTGTCTAATATAGA-TCTCAGAGGTTATAAATT-----ATGTT-ATCTTACTAT-----GTTAGGACAGTT-TC  
ACCTTGA-TTCT-TATAATAATCA-----

>Scr

ATAATGAGGT-----GAGTGCTAAAGTAACTTCTTGGCACCAGAGCTATA-TTAGGAAAGAAA-TTCTGG  
AAGTTTATTTT-----AAGAGCAACAT-GATTTTTTTTTT--AATGGCTTTTATTTTTGAAGTTACCAT-ATTGT  
GAAGTGTATCCAGACTCTAGTTTCAGTTTT-----GCTGTCTTATA-CATGAAGTATTTG--TGGTTGGCCAGTCTTAA  
GAAGAGAC-----CTACAT-----GGGGCAGGC-AGGTGGTGCAATGGATAGAGCACCAGCCTTAAAGTCTGGAG  
GACCTGAGTTCAAATATGACCTCAGACATATAACACTTCCTAGCTTTGTGACCCTGGGCAAGTCACTTA-ACCCCAATTG  
CCTC-AGGAAAAAAAAAAGAGACC-----TATAAT-----ATCTTACTAGTTTTTAAGCCATCTAAAAGAAATT  
CTAATTGTCTAGTATAGAATCTCAGAGGTTATAAATTATAA--TTTTT-ATCTTACTAT-AGGATGTTAGGGCAGTTTTTC  
ACCTTGATATCTTTATAATCCTTA---GATTGCGGCTCAGATCTGT

>Mfa

-----TACTTCTGGCAC-AGAGCAGTA-TTAGGGAAAAA--TTCTGG  
AAGCTTATTTT---GATGAATAAGAGAAACAT-GATTTTTTTTT---AATGGCTTTTATTTTTTAAATTACCAT-ATTGT  
GAAGTGTATCCAA--GCT-GCCTTAGTTTCAATTCTGCTGTCTTATA-CATAAAATATTTGG-TGGTTGGCCAATCTTAA  
GAGACC-----TACAAT-----  
-----  
-----ATCTTATTAGTTTTTAAAGCTCTCTAAAAGAAATT  
CTAATTGTCTAGTATAGAATCTCATGGGTATAAGTTATAATTATGTT-ATCTTACTAT-AGTATATTAGGGCAATTTTC  
ACCTTG-----

>Iob

-----TCTGGATC--GTCTTTTAATTAAGAAAAAGAAA-----  
AGCTTGACTTT-----AAAAAAGAACAA-AACTTTTTT-----CTAATYAACAT-ACTGT  
GATGTTTGT--CCAACCTCAGCCTCAGTTTTAATTATACTGTCTTATATATATAC-TGTTTCGG-TGGTCAGCCAGCTTTGA  
GGAAT-TT-----TATGAT-----  
-----  
-----ATCRTAATAGTTTTTAAACCCTCAAAAAGAAATT  
CTAAGTATCTAGTATAGAATTTTTGAGCTGATAAGTTAGTTATATTAT-----CTCAGAGTATATTAGGACAATT-TC  
RTCTTGATTCTGT-----

>Meu

GGAGGTGGGG-----TGGCTAGAATTACCTCCTGGTTGTCAGAGCTTTTTTATCAGGAAAGAATTTCTGTA  
AGCTTTCTTT---AATTAA-GAAAAAGGAGAA-GCATTATTTTTTTATCTGGACTTTTTTATTTTT-----  
-----GTAAATTGGCCTGTGCGACATATAGGAATATATTGTGCTTCA--CAGC-----  
-----  
-----  
-----  
-----











-----GTCTCAGTCTCTGAGCTTAAGAACTTAAATTTATATTG  
ACAGAAAGCAGATAGGAATGCAGAGAAGTCAATGTAAGATATTTACAACATA-----AGGGGAGAAGTAAGTAGT  
AACGGGGGAAATCAAGGTAGGCTTCTTGTAGGAGGTAGCTCCTGGCCT----AAGGCTGGAAGGAGGAGGATTCTAA-AG  
GCAGCTGACG---GGTAGGA-----CTCGTGCCCTTAGAAGTGCACTSAGAATTT-----  
-----CTTGCATTGG----AACAGGGAGTTGGGAAGGTTTCAGAGGCAAGGGGGAAACAG--GCCCGACTTAAAA  
GAACTTTCTCCCAAGGGCTGCAGAGAG-GTTCACCTGCACCGC-----T  
GTATCCTTCTCTCTTGGTTCTTGTTCCTTTCCAGTTTCTCCTTCTCCTC-----TGGCCCC-----  
--TGGCCCATCTGACATCACATGTGCTTCTGCAG-CT-----GGGCACCATGGGAGCTATGGAGGAGCTCAG-AG  
TCGGGGTGGGGCAGGAGGGTCTCTCCTCT-----CTGGGAACCTTCTCAGGCTCCAGG-TGG-CTGAGCTGC-TG  
CTCCGAG-GTGGACCTGGGTCAATTTGTGG-CTC-TTGCACCTTCCC-----

>Sha CPH

AGACACCCTTTTCAGAGGCTCAGGT-----GGGCCAC-----AATCACCTTT-----  
----ATTTTTATTTTTTTTTTGTCTGAGGTAATGTTGGGGTTAAGTGAAGTGGCCAGGATCACG-----  
-----  
-----

-----GTCTCAGTCTCTGAGCTTAAGAACTTAAATTTATATTG  
ACAGAAAGCAGATAGGAATGCAGAGAAGTCAATGTAAGATATTTACAACATA-----AGGGGAGAAGTAAGTAGT  
AACGGGGGAAATCAAGGTAGGCTTCTTGTAGGAGGTAGCTCCTGGCCT----AAGGCTGGAAGGAGGAGGATTCTAA-AG  
GCAGCTGACG---GGTAGGA-----CTCGTGCCCTTAGAAGTGCACTAAGAATTT-----  
-----CTTGCATTGG----AACAGGGAGTTGGGAAGGTTTCAGAGGCAAGGGGGAAACAG--GCCCGACTTAAAA  
GAACTTTCTCCCAAGGGCTGCAGAGAG-GTTCACCTGCACCGC-----T  
GTATCCTTCTCTCTTGGTTCTTGTTCCTTTCCAGTTTCTCCTTCTCCTC-----TGGCCCC-----  
--TGGCCCATCTGACATCACATGTGCTTCTGCAG-CT-----GGGCACCATGGGAGCTATGGAGGAGCTCAG-AG  
TCGGGGTGGGGCAGGAGGGTCTCTCCTCT-----CTGGGAACCTTCTCAGGCTCCAGG-TGG-CTGAGCTGC-TG  
CTCCGAG-GTGGACCTGGGTCAATTTGTGGGCTCTTTCACCTTCTCCCCCTTACAGGTGAA

>Dge

AGACACCCTTTTCAGAGGCTCAGGT-----GGGCCAC-----AATCACCTTT-----  
----ATTTTTA-TTTTTTTTTTGTCTGAGGTAATGTTGGGGTTAAGTGAAGTGGCCAGGATCACG-----  
-----  
-----

-----GTCTCAGTCTCTGAGCTTAAGAACTTAAATTTATATTG  
ACAGAAAGCAGATAGGAATGCAGAGAAGTCAATGTAAGATATTTACAACATA-----AGGGGAGAAGTAAGTAGT  
AACGGGGGAAATCAAGGTAGGCTTCTTGTAGGAGATAGCTCCTGGCCT----AAGGCTGGAAGGAGGAGGATTCTAA-AG  
GCAGCTGACG---GGTGGGA-----CTCATGCCCTTAGAAGTGCACTAAGAATTTATAAGAA-----  
-----TTTCTTGCATTGG----AACAGGGAGTTGGGAAGGTTTCAGAGGCAAGGGGGAAACAG--GCCCGACTTAAAA  
GAACTTTCTCCCAAGGGCTGCAGAGAGTGTTCACAGCACCGC-----T  
GTATCCTTCTCTCTTAGTTCTTGTTCCTTTCCAGTTTCTCCTTCTCCTC-----TGGCCCC-----  
--TGGCCCATCTGACATCACATGTGCTTCTGCAG-CT-----GGGCACCATGGGAGCTATGGAGGAGCTCAG-AG  
TCGGGGTGGGGCAGGAGGGTCTCTCCTCT-----CTGGGAGCCCTTCTCAGGCTCCAGG-TGG-CTGAGCTGC-TG  
CTCCGAG-GTGGACCTGGGTCAATTTGTGGGCTCTCTCCCCCTTCTCCCCCTTACAGGTGAA

>Pap

AGACA-CCTTTTCAGAGGCTCAGGTA-----TGTGTGGGCCAC-----AATCACCTTT-----AT  
TTTTATTTTTA--TTTTTTTTTGTCTGAGGTAATGTTGGGGTTAAATGAAGTGGCCAGGATCACACA-----  
-----  
-----

-----GTCTCAGTCTCTGAGCTTAAGAACTTAAATTTATATTG  
ACAGAAAGCAGATAGGAATGCAGAGAAGTCAATATAAGGTATTTACAACATA-----AGGGGAGAAGTAA-----T  
AACAGGGGAAATCAAGGTAGGCTTCTTGTAGGAGGTAGCCCTGGCCT----AAGGCTGGAAGGAGGAGGATTCTAA-AG  
GCAGCTGACG-GGGGTGGGA-----CTTGTGCCCTTAGAAGTGCATTAAGAATTTATAAGAA-----  
-----TTTCTTGCATGGGATCTTACAGGGAGTTGGGAAGGTTTCAGAGGCAAGGGGGAAACAG--GCCCTACTTAAAA  
GAACTTTCTCCCAAGGTT-----CACTGCACCAC-----T  
GTATCCTTCTCTCTTGGTTCTTGTTCCTTTCCAGTTTCTCCTTCTCCTC-----TGGCCCC-----

--TGGCCCATCTGACATCACATGTGCTTCTGCAG-CT-----GGGCACCATGGGAGCTATGGAGGATCCCAG-AG  
TCGGGGCGGGGAGGAGGGTCTCTCCTCT-----CTGGGAGCCCTTCCCTCAGGCTCCAGG-TGG-CTGAGCTGC-TG  
CTCTGAG-CTGGACCCGGGTCAATTCGTGGGTTCTCTCCCCCTTCTC-CCCTTACAGGTGAA

>Afl

AGACACCCTTTTCAGAGGCTCAGGTA-----TATGTGGGCCAC-----AATCACCTTT-----AT  
TTTGATTTTGA--TTTTTTGGCTGAGGCAATGGGGTTAAGTGACTTGCCCAGGGTACACA-----  
-----  
-----

-----GTCTCAGTCTCTGAGCTTAAGGAACTTAAATTTATATTG  
ACAGAAAGCAGTTAGGAATGCAGGGAAGTCAGTATAAGGTATTTACAACATA-----AAGGCAGAAGTAAGCAAT  
AACTGGGGAAAATCAAGGTAGGCTTCTTGTAGGAGGTAGCCCTTGGCCT---AAGGCTGGAAGGAGAAGGATTCTAA-AG  
GC-GCTGACT---GGTGGGA-----CTCGTGCCCTTAGAAGTGCACATAAGAATTTCTAAGAA-----  
-----TTCTTGCATGGGATCTTACAAGGAGTTGGGAAGGTTAGAGGCAAGGGGGAAACAG--TCCCGACTTAAAA  
GAACTTTCTCCTGAGGGCTGTAGAGG---TTCCTGTCATCGC-----T  
ATATCCTTCTCTTGGTTCTTGTTCCTTCCAGTTTCTCCTTCTCCTT-----TGGCCCC-----  
--TGGCCACCTGACATCACATGTGCTTCTGCAG-CT-----GGGCACCATGGGAGCTATTGAGGAGCCCAG-AG  
TCGGGGYGGGGCA-----CCGTGACTGGGAGCCTTCCCTCAGGCTCCAGGGTGG-CTGAGCTGCCCG  
CTCCGAGGTTGGACCTGGGTCAATTTGTGGGC-----TTTCTCCCCCTTACAGGTGAA

>Scr

AGACACCCTTTTCAGAGGCTCAGGTA-----GTGTGGGCTAC-----AATCACCTTT-----AT  
TTT-ATTTTA--TTTCTTCTGAGGC---TGGGGTAAGTGACTTGCCCAGGGTACACAGCCAGGAAGTGTTCAGTG  
TCTGAGAC-AGATTTGAACTCGGGTCTCCTGACTCCAGGGCTGGCGCTCTATCCACTGCGCCCCCTAGCTGCCCC---  
--AATCACCTTT-----GGTTTTGGGGTTAAGCC-----TTCTTTTAGTGACCAGTGAAGA-----GC  
CTTGGGGAAGCTCAGGACTCCCTGGAGAGTTCATATACTTACAGGAAGTCAGCGAGCATTAAAGTGC-----TTGCGG  
CCCTGGAGATACAAAAAGCCTCCCCACAAA-----GTCCAGCCTCATC-----A  
ACAGAAAGCAGATAGGAAGGCAGAGAAGCCAGTATAAGGTATTTACAACCTA-----AGGGGAGACGTAAGTAGT  
AACTGGGGAAACCAGGCTAGGCTTCTGTGAAGAAGTAGCCCTTGGCCT---AAGGCTGGCAGGAGAAGGATTCTCA-AG  
GCAGCTGACT---GATGGGA-----CTCGTGCCTT-AGAAGTGCAC TAGGAATTTACGA-----  
-----TTCTTGCATGGGATCTTACAGGGAGTTGGGAAGGTTAGAGGCAAAGGGGAAACGG--TCCCTACTTAAAA  
GAACTTTCTCCCGAGGGCTGTAGAGA-TGTTGCTGCACCAC-----  
-TACCCTTCTCTTAAATTTCTTGTTCCTTCCAGTTTCTCCTTCTCCTCCTC-----TGGCGCC-----  
--CGGCCATCTGACATCACATGTGCTTCTGCAG-CT-----GGGCACCCTGGGAACCATT--AGGATCCAG-AG  
TCGGGG-CGGGCAGGAGGGTCTTCTCCTCCTGTGACTGGGAGCCCTTCCCTCAG-CTCCCGGGTGG-CTGAGCCGCC-G  
CTCCGAG-ATGGACCTGGGTCAATTTGTGGGCTCTCTTCCCCCTTCTCCCTTACAGGTGAA

>Mfa

-----CCTTTTCAGAGGCTCAGGTA-----G-GTGGGCTCC-----AATCA-CTTT-----  
---CATTT-----TTTTTTTGTGAG-----TAAGTGACTTGCCCAGGGTACACAGCCAGGAAGTGTAAAGTG  
TCTGAGACCAGATTTGAACTCAGGTCTCT-GACCTCAGGGCTGGTGCTCCCTCCACTGCACCAACTAGCTGCTCGC---  
--AATCATCTTT-----ATTCTTGATGTTAAMCC-----TCTTCTAGTGACTGGTGAAGA-----AC  
CTTGGGGAAG-TCAGACCTCCCTGGAGAGTTTATCCACTTACAGGAAGTCAGCAAGCATTAAATGCCTACTGTGTGCAAG  
CACTGGAGATAAAAAAAAAAAAAACCACCAT-----GTCCAGTCTCTGAGCTTAAGGAACTTAAATTTATATTG  
ACAGAAAGCAGGTAGGAATGCAGAGAAGTCAGTGTAAGGTATCTACAACATA-----AGGGGAGAAGAAAGTAGA  
AACTGGGGAAAATCAAGGTAGGCTTCTTGTAGGAGGTGGCCCTTGGCCT---ATGGCTAGGAGGAGGAGGATTCTAA-AG  
GCA-CT-----TGTGGGA-----CTCGTGCCCTTAGTGATGCACATAAGAATTTATTGTGAT-TGGATAAGTGT  
TTATTAAGTGACTTTCATGGGATCTTACAGGGAGTTGGGAAGATTACAGACACAAAGGGGAAAAAG--GCCTGACTTAAAA  
GATCTTCTCTCAAGGCCTGTAGAGAGTGTTCACCTGCAGCACC-----  
ATATCCTTCTCTTGGTTCTTGTTCCTTCCAGTTTCTCCTTCTCCTT-----TGGCCCC-----  
--TGGCCCATCTGATACCACATGTGGTTCTATAG-CT-----GGGCACCATGGGAGCTACCGAGGAGCCCAG-AG  
TGAGGGAAAGGCAGGAGGAGTTTCTCCTCACCATGACCAGGAGCCCTTCCCTCAGGCTGCCAGGTGG-CTGAGCTGCCTG  
CTCCAGG-ATGGACCTGGGTCAATTCGGGGGCTCTCTCCTTTTTCTCCCCCTTACAGGTAAA

>Nty

AGACTCCCTTTTCAGAGGCTCAGGTA-----TGTGTGGGCTCC-----AGTCATCTTT-----  
-----  
-----

-----ATTCTTGGTGTTAAAACCTATTCCGCACTCTGTTG-GTGACTGGTAAAGAGTCAAGCAC  
CTTGGGGAAGCCCATGCCT-----ACTATGTGCC-AGCGCACG-AGAG  
ATATGAAGGCAAAAAAAAAA-----TCCAATCCCATAGTTAAGGAGCTTAAATTCATATTG  
CCAGAAAGCA-----AATGTAATTTCCAGTAR-----AGAAGTAAGTAGT  
ACTTAGGGAAATCAAGGTAGGCTTCTGGTGGAAGGTAGCCCTTG-----GGATTCCTAA-AG  
GCAGGTAACCTAARAAAGGAA-----CTGGTGCCCTAARAGATGCATTATGAATCTA--GTCAA--TCATTGGATA  
TTATTAATTTATTTGCATGACACCTAAAAGGGAATTGGGAGGATTCAAAGACAAAGGGGGAAGTGG-TCCCACCTAAAA  
GAGCTCACCTTCAAAGTGTTCACTGGA---TTGACTACACTGCCG-----TCTTTTTCTCT-----GAT  
GGGTCCCTTGTCTTTCCCC---GTTGCGGTACTTTATTCTCCATCCTTCTTTCCTGTGGTCCAGGT-CAC-----  
--TGTCCCTTTTGATATCATGTGTGGTFTTCTAG-CT-----AGGCACC-----GGAGTCCAGTAG  
T-GGGGCAGGGCA-----CTTGACCAGGGGCCCTTGCTCAAGCCCCAGAAGGACTGATCATGCCT  
CTCATTC-ATTGAC-----TCCTTCCCCATCCTCACCCCTTACAGGTAAA

>Pgu

AGACTCCCTTTTCAGAGGCTCAGGTA-----TGTGTGGGCTCC-----AGTCATCTTT-----  
-----

-----ATTCTTGGTGTTAAAACCTATTCCGCACTCTGTTG-GTGACTGGTAAAGAGTCAAGCAC  
CTTGGGGAAGCCCATGCCT-----ACTATGTGCC-AGRCACG-AGAG  
ATATGAAGGCAAAAAAAAAA-----TCCAATCCCAGTTAAGGAGCTTAAATTCATATTG  
CCAGAAAGCA-----AATGTAATTTCCAGTAG-----AGAAGTAAGTAGT  
ACTTAGGGAAATCAAGGTAGGCTTCTGGTGGAAGGTAGCCCTTG-----GGATTCCTAA-AG  
GCAGGTAACCTAAGAAAGGAA-----CTGGTGCCCTAAGAGATGCATTATGAATTTA--GTCAA--TCATTGGATA  
TTATTAATTTATTTGCATGACACCTAAAAGGGAATTGGGAGGATTCAAAGACAAAGGGGGAAGTGG-TCCCACCTAAAA  
GAGCTCACCTTCAAAGTGTTCACTGGA---TTGACTACACTGCCG-----TCTTTTTCTCT-----GAT  
GGGTCCCTTGTCTTTCCCC---GTTGCGGTACTTTATTCTCCATCCTTCTTTCCTGTGGTCCAGGT-CAC-----  
--TGTCCCTTTTGATATCATGTGTGGTFTTCTAG-CT-----AGGCACC-----GGAGTCCAGTAG  
T-GGGGCAGGGCA-----CTTGACCAGGGGCCCTTGCTCAAGCCCCAGAAGGACTGATCATGCCT  
CTCATTC-ATTGAC-----TCCTTCCCCATCCTCACCCCTTACAGGTAAA

>Iob

AGACTCCCTTTTCAGAGGCTCAGGTA-----TGTGTGGGCTCC-----AGTCATCTTT-----  
-----

-----ATTCTTGGTGTTAAAACGACTCCGCACTCTGTTG-GTGACTGGTAAAGAGTCAAGCAC  
CTTGGGGAAGCCCATGCCT-----ACTATGTGCC-AGCACACG-GGAG  
ATATGAAGGCAAAAAAAAAA-----TCCAATCCCAGAGTTAAGGAGCTTAAATTCATATTG  
CCAGAAAGCA-----AATGTAATTTCCAGGAG-----AGAAGTAAGTAGT  
ACTTAGGGAAATCAAGATAGGCTTCTGGTGGAAGGTAGCCCTTT-----TGATTCCTAA-AG  
GCAAGTAACCTAAGAAAGGAA-----CTGGTSCCCTAAGAGATGCSATATGAATTTA--GTCAG--TCATTGGACA  
TTATTAATTTATTTGCATGACACCTAAAAGGAGTTGGGAGGATTCAAAGACAAAGGGGGAAGTGG-TCCCACCTAAAA  
GAGCTCACCTTCAAAGTGTTCACTGGA---TTGACTACACTGCCG-----TCTTTTTCTCT-----GAT  
GGGTCCCTTGTCTTTCCCC---ATTGCGGTATTTTATTCTCCATCCTTCTTTCCTGTGGTCCAGGT-CAC-----  
--TGTGCCTTTTGATATCATGTGTGGTFTTCCAG-CT-----AGGCACC-----GCAGTCCAGTAG  
T-GGGGCAGGGCA-----CTTGACCAGGGGCCCTTGCTCAAGCCCCAGAAGGACTGATCATGCCT  
CTCAT-TCATTGAC-----TCCTTCCCTCATTCTCACCCCTTACAGGTAAA

**MARKER 30**

>ShaERV1

-----GCAGAGGTTCCAAACATACCAGCCTTATAC-CTGGCATAACCAGGACGCTCTGTCCACT  
GGAACCCCTGTTCCGGTGTCCCTTT-----TATCTTTACCCTCACCTATTTCCCT-AACTATACTTTAACCTTACTTTCAA  
CCCCATAATAAACCTCTTTTAT--CAATCTAGCTTTTTTG---GGCCAATAA-----

>WSINE1

-----CCAGCCCTGGAGTCA  
GGAGGACCT-----GAGTTCAAATCCAGCCTCAGACACTTACTAGCTGTGTGACCCTGGGCAAGTCACTTAACCCCA  
ATTGCCTCAAAAAAAAAAAAAA-----

>WSINE1

-----TTTTTTTTTT  
TTTT--GAGGCAA--TTGGGGT-TAAGTGACTTGCCAGGGTCAC--ACAGCTAG-----TAAGTGTCTGAGGCTGG  
ATTTGAACTCAGG-----TCCT--CCTGACTCC-AGGGCTGGTGCTCTATCCA-----

>Sha DB

AAATCCTCTATAAGGT-----AATTTATTTTCATTTGTC-AAATATTTTT--GAATCTTTTAAAGATTAG  
-----ATGTAA-----GCAGAGGTTCCAAACATGCCAGCCTTGCTC-CTGGCATGCCAGGACCCCTCTGTCCACT  
GGAACCCCTGTTCCGGTGTCCCTTCT---TATCTCTATCTTCACCTATTTCCCTTAACTATACTTTAACTTACTTCCAAA  
CCCCATAATAAACCTCTTTTATATCAATCTTAAAAAAAA--AAAAACAAAACAAA-----AACGTAA-----  
-----CCCTTGGTGTAAAGAC--CTGTAGAAAT--GGAGAAT-CTT---CAA-ATAAAAGT-GA-AAGAGAA  
A-CCT-CT-----TTTTAATGA-TTTTTAGATGTGTAAAGAACATGTCATC-AGTT-GGGT  
AGTA--ACAATAAT-ATGCCTAAATTATGAT-----TCCATTTCTTTT-----



-----  
-----  
-----GAGAGT-GTAAGTTCTCCT-TCCTTTCATCTAAATCGAACTTGGAATATA-----  
--TGTTCCCTTGTGTATGTTTACAT-----ACAGCCCTGAAGTCA  
GGAAGATCTAGGTTCAA-----TGCAAGTCACTTAACCCTA  
ATTACCTCAGCAAAAAAAAAAAGAAAAGAAAAGAAAAAAAA-----GTGGGCTTATGTATGCCTGGTGATGAA  
AC--TGCTGCTCTTTTTTCACTTTTTTCTCTCCCAAACTTTTTTTTTCTCAATATACA

>Sha CPH

-----TTTAAAGATTAG  
-----ATGTAA-----GCAGAGGTTCCAAACATGCCAGCCTTGCTC-CTGGCATGCCAGGACCCCTGTGCCACT  
GGAACCCCTGTTCCGGTGCCTTCT---TATCTCTATCTTCACCTATTTCCCTTAACTATACTTTAAACTTACTTCCAAA  
CCCCATAATAAACCTCTTTTATATCAATCTTAAAAAAAA---AAAAAMAAAAAAA-----AAACGWAM-----  
-----CCCTGGTGGTAAAAC--CKGKAAAAAK--GGAAAAT-CTT---CAA-ATAAAAGT-GA-AAAAAA  
A-CCT-CT-----TTTTAAKGA-TTTTTAAAKGTGTTAAAGAAMWTGTCWTC-MKTT-GGGK  
ARWA--ACAawaat-WTSCCWAaATTAWGAT-----TCCWTTCTTTT-----

-----GRRAGK-GKARGTTCYCCT-YCCTTTYWTYWAAATCRAAYTTGGAAWATW-----  
--TGTYCCTKGKGWAKGTTTMCWT-----ACRGCCCYGAAGYCA  
GGAARAYY-AGGTTCAAW-----TGCAAKTCMYTTACCCYWA  
WTTACCYYCGCAAAAAAAAAAAGAAAAAAAAAAGAAAAA-----GKGGCYTWWKTKCKGGKRWRAA  
AM---KGKSCCCTTTTMMTTTTTYCYCCCMaAYTTTTTTTTTY-----

>Dge

-----AATATTTTT--GAATCTTTTAAAGATTAG  
-----ATGTAA-----GCAGAGGTTCCAAACATGCCAGCCTTGCTCCCTGGCATGCCAGGACCCCTGTGCCACT  
GGAACCCCTGTTCCGGTGCCTTCT---TATCTCTACCTTCACCTATTTCCCTTAACTATACTTTAAACTTACTTCCAAA  
CCCCATAATAAACCTCTTTTAT--CAATCTAAAAAAAA-----GACT-----AGATGTAA-----  
-----CCCTGGTGTAAAGAC--CTGTAGAAAT--AGAGAAT-CTT---CAA-ATGAAAGT-GA-AAGAGAA  
A-CCT-CT-----TTTTAATGA-TTTTTAGATGTGTTAAAGAACGTGTCATC-AGTT-GGGT  
AGTA--ACAATAAT-ATGCCTAAATTATGAT-----T-CATTTCTTTT-----

-----GAGAAT-GTAAGTTCTCCT-TCCTTTCATCTAAATCCAACCTTGGAATATA-----  
--GGTTTCTTGTGTATGTTTACAT-----ACAGCTTTGAAGTCA  
GGAAGATCTAGGCTCAA-----TGCTGTGGGGCAAGTCACTTAACCCTA  
ATTACCTCAGCAAAAAAAAAAAAAAAAAARRAAAAAAAA-----GTAGGCCTATGCATGCCTAGTGATGAA  
AC--TGCTGCTCTTTTTYCWTTTTTCCCYCCCMaAWTTTTTTTTTT-----

>Pap

AAATCCTCTATAAGGT-----AATTTATTTTCATTTGTC-AAATATTTTT--GAATCTTTTAAAGATTAG  
-----ATGTAA-----GCAGAGGTTCCAAACATGCCAGCCTTGCTC-CTGGC-TGCCAGGACCCCTGTGCCACT  
GGAACCCCTGTTCCGGTGCCTGCTTATTTATCTCTATCTTCACCTATTTCCCTTAACTATACTTTAAACTTACTTCCAAA  
CCCCATAATAAACCTCTTTTAT--CAATCTAAAAAAAA-----AAAAAAAAAAAAAAGACT-----AGCTGTAA-----  
-----CCCTGGTGTAAAGAC--CTGTAGAAAT--AGAGAAT-CTT---CAA-ATGAAAGT-GR-AAGAGAA  
A-CCT-CT-----TTTTAATGA-TTTTTAGATGCGTTAAAGAACATGTCATC-AGTT-GGGT  
AGTA--ACAATAAT-ATGCCTAAATTATATT-----CATTTCTTTT-----

-----GAGAGT-GTAAGTTCTCCT-TCCTTTCATCTAAATCGAACTTGGAATATA-----  
--TGTTCCCTTGTGTATGTTTACAT-----ACAGCCCTGAAGTCA  
GGAAGATCTAGGTTCAA-----TGCTGTGGGGCAAGTCACTTAACCCTA  
ATTGCCTCAGCAAAAAAAAAAAAAAAAAAAAAAAAA-----GTGGGTCTATGCATGCCTGGTGATAAA  
AC--TGCTGYTCTTTTTTCACTTTTTTCTTTCCCAAACTTTTTTTTTCTCAATRTACA

>Af1

-----TTGTC--AATATTTTT--GAATCTTTTAAAGACTAG  
-----ATGTAA-----

-----  
-----  
-----CCCTTGATATTAAGAC--CTGTAGAAAT--AGAGAAT-CTT---CAA-ATAAAAGT-TG-AAAGARA  
AACCT-CT-----TTTTAATGA-TTTTTAGATGTGTT-AAGAACATGTCATC-AGTT-GGGT  
AGTA---ACAATAAT-ATGCCTAAATTATGAT-----T-AATTCCTTTT-----  
-----

-----GAGAGT-ATGAGTCCTCCT-TCCTTTCATCTGAATCAAACCTGAAATAAT-----  
--TGTTCCCTTGTTGATGTTTACAT-----AATGCCCTGAAGTCA  
GGAAGATCTGGATTCAGA-----TGCTGTGGGGCAAGTCACTTAACCCTA  
ATTGTCTCAGCAAAAAAAAAAAAAAAAAA-----GTGGGCCTATGCATTCCTGGTGTATGRR  
AC--TGCTATTCCTTTT-CACTATCCTCTC-----  
-----

>Pta

-----TTGTC--AATATTTTT--GAATCTTTTGACGACTAG  
-----ATGTAA-----  
-----

-----CCCTTGATATTAAGAC--CTGTAGAAAT--AGAGAAT-CTT---CAA-ATGAAAGT-GA-AAGAGAA  
A-CTT-CT-----TTTTAATGA-TTTTTAGATGTGTT-AAGAACATGTCATC-AGTT-GGGT  
AGTA---ACAATAAT-ATGCCTAAATTATGAT-----T-CATTCCTTTT-----  
-----

-----GAGAGT-ATGAGTTCTCCT-TCCTTTCATCTGAATCAAACCTGGAGTAAA-----  
--TGTTTCTTGTGTATGGTTACAT-----ACTGCCCTGAAGTCA  
GGAAGATCTGGATTCAGA-----TGCTGTGGAGCAAGTCACTTAACCCTA  
ATTTCTTAGCCAAAAAAAAAAAAAAAAARR-----  
-----

>Pin

-----AAGACTAG  
-----ATCTWR-----  
-----

-----TCCTTGGGGTTAAGAC--CTATAGAAAT--AGAGAAT-CCT---CAA-ATGAAAGT-GA-AAGAGCA  
A-CCT-CT-----TTTTTATGATTTTTTATGATGTGTT---AACATGTCATC-AGTT-GGGT  
AGTA---ACAATTAT-----GAT-----T-CATTCCTTTT-----  
-----

-----GAGAGT-ATAAGTTCTCCT-TCCTTTCATCTGAATCAAACCTGGAATAAT-----  
--TGTTCCCTTGAGTGTGTTTACAT-----ACAGCCCTGAAGTCA  
AGAAGACCTAG--TCAAATCTGGTCTCAGACACTTAACACTTCCCTAGCTGTGTAACCCTGGGCAAGTCACTTAACCCCA  
GTTGCCTCAGCCAAAAAAAAAAAAAAAA-----  
-----

>Scr

-----TTGTC--AATACTTTT--GAATCTTTTAAAGACTAC  
A-----TTCTAA-----  
-----

-----CCCTTGGGGTTAAGAC--CTGTAGAAAT--AGCGAAT-CCT---CAA-ATGAAAGT-TC-AAGAGCA  
A-CCT-CT-----TTTT-ATGA-TTTTTAGAYGTGTT-AAGAACATGTCATC-AGTT-GGGT  
AGTA---AAAAATAAT-ATGCCTAAATTATGAT-----T-CATTCCTTTT-----  
-----

-----GAGAGT-ATAAGTTCTCCT-TCTTTCATCTGAATCAGACTTGGAATAAA-----  
--TGTTCCCTTGTTGTTGTTTACAT-----ACAGCCCGAAGCCA  
GGAAGTCCCTCGGTTCTAATCTGGTCTCAGACACTTAACACTT-CCTAGCTATGTGACCCGGGCAAGTCACTTAACCCCA  
-----

ATTGTCTCAGCAAAAAAAAAAAAAAAAAAAAAARR-----

>Mfa

AAATCCTCTATAAGGT-----AATTTATTTTCATTTGTC-AAATACTTTT--GAATCTTTTAAAGACCTA  
-----ATTTT-----

-----AGGGTTAAGAT--CTGTAGAAAT--AAAGACT-CTT--CAA-GTTAAAGA-GC-AAA---  
--CTC-CT-----TTTAACGA-TTTTTAGATGTGTT-AAGAACATGTCATC-AGTT-GGGT  
AGTA--AACACTAAT-ATGCCTAAATTATGAT-----T--TTTCTTTT-----TTTCTTTCTTTTTGCT  
TTTTGCTGAGGCAA--TTGGGGT-T---GACTTGCCAGGGTCAC--ACAGCTAGGGAATGTTAAGTGTCTGAGACCAG  
ATTTGAACTCAGG-----TCCT--CCTGACTTT-AGGGCTGGTCCTCTATCTAGA-----TTCATTTCTTTT-  
-----GAGAGT-ATAAGTTCTCCT-TCCTTTCATCTGAATCAAACCTGGAATAAA-----  
--TGTTTCTTGGATGTGTTTACATACATATAGTGCAT-----

-----GTGCCCATG--CATGCCTGGTGATGA  
AA-CTGCTGCTCTTTTTCACTTTTTCTCTCCCAAACCTTTTTCTTAATATATA---

>Pgu

-----TATATTTTGATTTGTC-AAATACTTTG--GAATCTTCTAAAGACTTA  
-----GTTTAA-----

-----CCAGTAGG-----AC--CAATAGAAGT--AGAGAGT-CAT--CAA-ATGAAAAGT-GA-AAGAGCA  
ACCTC-TT-----TCAAAGA-----TACTCGTCTGACCATGCATGTCCTC-AGTCTGGTA  
ACAA--AAGAATAAC-ATGGCTAAATTATGAT-----T-CATCTCTGATT-----

-----CTGAAT-ACAAGCTC--T-TCCTTCTACCTGAATTCAGCTTGGGATAGGAATAACT-----

-----GTTT-CATGTGCATGCATGGAGCTGA  
AA-CAGCTGAACTTTTTCA-TTTTTTCTCTCCTAACATCTTGGCTAAATATACA---

>Meu

AAATCCTCTATAAGGT-----AATTTACTTTGGTTTGTGTC-AAATACTTTT--GAATCTTCTAAAGACTCA  
-----GATTAA-----

-----CCAGTGGG-----AC--CCAAAAAAT--AGAGATT-TTT--CAA-ATGAAAAAT-GA-AAGAGCA  
ACCTC-TG-----TTTAACGA-TTTCTAGTTGTGTT-ATGAACATGTCATCAAGTTTGATA  
GTGA--ACATAATAC-AT-CTTAA-TTATGAT-----T-CATCTCTTTTAAGT-----

-----GAGAGT-ATAAGCTG-----CTTTTATCTGAATCAAACCTGGAATAGGAATGAATATTTTCATGTATATG  
AGTGCTCCTTTTTGTGTGTATGCCTGTACATGTACATACACACACATTTTTGA-----

-----GTCGCTCTGTACATGCCTGTTGCTGA  
AG-CTGACGACCTTTTTTCATTTTTTTCTCTCCCAAACCCCTTTTCTCATTTTACA-

>Mdo

AAATCCTCTATAAGGT-----AATTTACTTTGGTTTGTCAAAAAATCCTTTGGAATCTTCTAAAGCCTCA  
-----GTTTAA-----

-----CCAGTAGG-----AC--TCATGGAAAT--CAAAAAAT-CTT--TCAC-ATTAAAGT-GA-ATTA---  
--CAC-TCATTAAGTAAATTCTTAACTCCTTTTTATGGA-TTTCTAAATGTGTT-ACAAACATGTCATCC-GTTGGAGA  
GTGA--ATATCCC-----TAGTGAAT-----

-----  
-----  
-----GAGAGTATAATATAGTTCT-CCCCTTCATCTGAATCAAACCTGGAATAGTAGGAATAAATGGGGGTGGGGG  
GGGGCTGCAT-----ACTTGTACAACACAGGCA-----  
-----  
-----TGTGAGTACCTCATGTCTGCCTGATGTTAA  
AG-CTGCTCATCTTTTTCAC-TTTTCTTCTCCCAAACCCTTTTCTAAACACATTA-

**MARKER 44**

>WSINE1

-----TTT-----GAGGCAATTGGGGTTAAGTGACTTGCCCAGGGTC  
ACACAGCTAG-----TAAGTGTCTGAGGCTGGATTTGAACTCAGGTCCTCCTGACTCCAGGGCTGGTGCTCTATCCAC  
TGCACCACCTAGCTGCCCC-----  
-----  
-----  
-----  
-----  
-----  
-----  
-----

>Sha DB

TACATATATGATCCTCTTTTTTAACGAACTTCAAATTTTCAGTTCTCAATGCTCTTGGTCTGACTGTCCTCAAAGAGAA---  
-----TGAGGTAAGA-----TCTCCTCTCT-CCCCCCTCCCCCAGGCATTTGGGGTTATGTGACTTGCCCAAGGCC  
ACATAGCTAGGAAGTGTAAAGTGTATGAGGCCAAATTTGAACACAAGTCTTCTGACTTCAGGGCTGGTGCTCTATCCAC  
TGTGCCATCTAGCTGACCC-----TGAGGTAAGA-----TCTTAAGAA-----TGGA--CAAGGGAAAGCTTAG  
TA-TCGATCTTCTAAACTCAAGCCACAGCTCTGTACCATGAGAGTCACTTCTCT--GAAAAGGTGACTT--ACATACTCT  
GGTGGAGCACTCCAC--TCAGACCAACTCCCACGTGACAGGTAGTCTTTGACCAGTCCCAT-GGCACATAAAGGTCTGTC  
G--TTCTGCTGTGCAAGCACAACCTTCATAAACTCAAGGTGGTCTCTGTTT---CAACAGAATTCAGAGGATCTTCAGGG  
AGGG-TGGG-----  
-----TTAGTTCCTTTTGTGTTGAATCTAACTGGGGTGGTTTCTAT  
GGAGTATAGCA-ATCTGCGTTCTGCTCGTCACAGTATTGCCAAATTTGTT

>Dge

TACATATATGATCCTCTTTTTTAACGAACTTCAAATTTTCAGTTCTCAATGCTCTTGGTCTGACTGTCCTCAAAGGAGAA---  
-----TGAGGTAAGA-----TCTCCTYTTCCCCCCCCYCCCCCAATGCATTTGGGGTTAAGTGACTTGTCCAAGGCC  
ACATAGCTAGGAAGTGTAAAGTGTATGAGGCCAGATTTGAACACAAGTCTTCTGACTTCAGGGCTGGTGCTCTATCCAC  
TGTGCCATCTAGCTGACCC-----TGAGTAAAGA-----TCTTAAGAA-----TGGA--CAAGGGAAAGCTTAG  
TA-TCGATCTTCTAAACTCAAGCCACAGCTCTGTACCATGAGAGTCACTTCTCTCTGAAAAGGTGACTT--ACATTCTCT  
GGTGGRCACKCCACACTCAGACCAACTCCCACGTGACAGGTAGTCTTTGACCAGTCCCAT-GGCACATAAAGGTCTGTC  
G--TTCTGCTGTGCAACCACAACCTTCATAAACTCAAGGTGGTCTCTGTTT---CAACAGAATTCAGAGGATCTTCATGG  
AGGG-TGGG-----  
-----TTAGTTCCTTTTGTGTTGAATCTAACTGGGGTGGTTTCTAT  
GGAGTATAGCAA-TCTGCG-TCTGCTCGTCSAGATWA-----

>Scr

TACATATTTGATCCTCTTTTTTAACGAACTTCAAATTTTCAGTTCTCAATGCTCTTGGTCTGACAGTCTCGAGGAGAA---  
-----TGAGGTAAGA-----TCTTTATTTTTTTTCCCCTCTGAAGCAATTGGGGTTAAGAGTCTTGCCCAAGGTC  
ACACAGCTAGGAAGTGTAAATGTCTAAGACCAAACCTTGAAC-TAAGTTCCTAACTTCAGGGCTGGTGCTCTAACCAC  
TGGGCCACCTAGCTGACCC-----TGAGGTAAGA-----TCTTAAGAA-----TGGA--CAAGGGAAAC-TTAG  
TG-TTGATCTTCTAAACTCAAGCCACAGCTCTGCACCATGGGAGTCACTTCTCTCTGAAAAGGTGACTTTTAAACTCT  
GGTGGAGCACTCCACACTCAGACCAACTCCCACGTGACAGCTAGTCTTTGACCAGTCCCAT-GGCACGTAGGGTCTGTC  
A--TTCTGCTGTGCAAGCACAGCCTTCACAACTCAAGGTGGTCTCTGTTT---CAACAGAATTCAGTGGATCTTCATGG  
AGGG-TGGGCACAA-CTCTCAATCTTCTTTGTAC-----TTTGTGTGATTCAGGC---AAA  
GATGTCAAACAA-----AAGGCAGACT-CCCAGGGCCTCACCAGGGGTT-TGTGGTCCAAGTTTCTATTTTGAATTT  
GA-----CTCAACTCAGGACATCCAGTGATGGGC-----TTAGTTCCTTTTGTGTTGAATCTAACTGGAATGGTTTCTGT  
GAAGTATAAGCAAT-----

>Pin

-----ACTG-AATTTTCAGTTCTCAT-GYTCTCGGTCTGACTGTCCTCAAAGGAGAA---  
-----TGAGGTAAGA-----TCTCCCCTCCTCCCCCAAGGCAATGGGGTTAAGTGACTTACCCAAGGTC  
ACACAGCTAGGAAGTGTAAATGTCTGAGATCAAATTTAAACTCAGGCTCT-CTGACTTCAGGGCTGGTGCTCTATCCAC  
TGCGCCACCTAGCTGACCC-----TGAGGTAAGAA-----TCTTAAGAA-----TTGA--CAAGAGAAAC--AG  
TG-TCAATCTTCTAAACTCAAGCCACAGCTCTGCCCATGGGAGTCACTTCTCTCAGAAAAGGTGACRTTTTAAACTCT

GGTGGAGCACTCCACATTCAGACCAACTCCCACATGACATGTAGTCTTTGACCAGTCCCAT-GGCACTGTAGGATCTGTC  
G--TTCTGCTGTGCAAGTACAGCCTTCACAACTCAAGGTGGTCTCTGTTT---CAACAGAATTCAGAGGATCTTCATAG  
AGGG-TGGGCACAA-TTCTCAATCTTTTTTGTAC-----TTTGTGTATATTCAGGC---AAA  
GATGTCAAACAT-----ATGGCCGACT-CCCCAGGGCCTCACCAGGAGTTTAGTGGTCCAAGTCTCTATTTTGAATTT  
TA-----CTCAACTAAGGACA-----

>Mfa

TACATATTTGATCCTCTTTTTAATGAACTTGAATTTTCAGTTCTCAACACTCTTGGTCTGACTGTCCCTCAAGGAGAA---  
-----TGAGGTAAGA-----

-----TCTTAAGAGTAAGAATGAA--CAAGGGGAAGCTTAG  
CATCGAGCTTCCATAACGCAAGCCAA-GCTCTGCACCATGGGAGTCACTTCTCTCTGAAAAGGTGACTTTTAAACACTGG  
TGGAGCACTCCACAC--TCAGACCAACTCCCATGTGACAGATAGTCTTTGACCACCTCCAT-GGGACTGTAGGGTCTATC  
A--TTCTGCTGTGCAGTCACAGC-TTCACAACTCAAGGTCTCCTCTGTTT---CAATAGAATTCAGAGGACCTTCCCTGG  
AGGG-TGGGCACAT-TTCTCAATCTTCTGTGTAC-----TTTATATGTACTTATGCAAARGT  
CATGTCAAACAA-----ACTGCCACT-CCCCAGGC-CTCACCAAGGGTTTAGTGGTCCGAGTTTCTATTTTGAAGTTT  
GATCCCTACTCAACTAACAACATC-AGTGATGGGCTTGGGTTGAATTCCTTT-GTTGAATCTAA-CTGAAGTGGTTTCTA  
TGGAGTATAGCAATCTGCGTCTGCTAGTCACCAASTA-----

>Iob

TATATATTTGATCCTCTCTTTCAGTGAACCTTGAATTTTCAGTTCTTAACAACCTTGGTCTGATTGTTCTTAATGAGAA---  
-----TGAGGTAAGA-----

-----TTTTATGAAGAAGAG-----CTAAGGGGAAGCTTGG  
TATAAATCTT---A-TCTCAAATCAAGGTTCTGGACCATGGGAGTCACTT-GCTCTGAAAGGCTGACTTTCAAACACACT  
AGAGGAACTCT-CCAATATAAGCTAACTCCCAGGTGACAGA--ATTTTGGACCAGTCCAC-TGACTGGTAAGGTCTGTC  
AGGTTCTGCTGTAGCAGTACAACCTTCACAAA-CCAAGTTCTATTCTGTAC---CAAGAGAATTCAGAGGACC-----  
-----TGGGGAT-----ACTTTTCTATGTAC-----TTTGTACATATC-ATTC---AAA  
GATGTTAAAAGA-TGGCTGACTGCC-AGT-----ATCCCCT--CCAGGGGTTTAGTGGTCCGAGTTTCTGTTT-GAATTT  
GA-CTCTACTGAACTAAGACATCAA-TGATGAGTTCAGGTTGAGTTCCTTT-TGAAAAATTTGATTGGAGTAGTTTTAG  
TTTCTCTGAAGCCTAGCAATTTCCATTCTACCAGTCAC-----

>Pgu

TATATATTTGATCCTCTCTTTCAGTGAACCTTGAATTTTCAGTTCTTAACAACCTTGGTCTGATTGTTCTTAATGAGAA---  
-----TGAGGTAAGA-----

-----TTTTATGAAGAAGAG-----CTAGGGGAAGTTTGG  
TATAAATCTTCTCA-TCTCAAATCAAGGTTCTGGACCATGGGAGTCACTT-GCTCTGAAAGGCTGACTTTCAAACACACT  
AGAGGAACTCT-CCAATATAAGCTAACTCCCAGGTGACAGA--ATTTTGGACTAGTTCAC-TGACTGGTAAGGTCTGTC  
AGGTTCTGCTGTAGCAGCACAACCTTCACAAA-CCAAGTTCTATTCTGTACTAAGAGAAGAATTCAGAGGACC-----  
-----TGGGGATACTTTTCTACG-TACTTTGTACATATC-ATTCAAAAGATGTTAAAAGTTAAAAGTACCTATCATTTCAA  
GATGTTAAAAGA-TGGCTGACTGCCAGT-----ATCCCCT--CCAGGGGTTTAGTGGTCCAGTTTCTATTT-GAATTT  
GA-CTCTACTGAACTAATGACATCAA-TGATGAGTTCAGGTTGAGTTCCTTT-TGAAGAATTTGATTGGAGTAGTTTTA-

>Macropus

TGTATATTTGATCCTCTCTTTAATGAAATGAAATTTTCAGTTCTTAACACCCTTGGTCTGACTGTTCTCAGTGAGAA---  
-----TGAGGTAAGA-----

-----TTTTAAGAGTTAAAAT-----ATGCCAGGAGCTTAG  
TGTAGATCCTGTCA-----CTTC-TGAAGGGAT-GACTTT-----CAAACACTCT  
GGTGGAGCTCT-CTACACTCAGT---CTCCCAGAG-----TCTTTAACCAGTCGCATTGGACTGGTAGGATGTGTC  
AGCTTCTATCATGCTAGCATGGCCTTCACAGACCACG--GTCCCCTCTAC-ACCACCAGAATTCAGAGGACCATAGTGG  
AGGG-TGGG-ATGC-TTCTCAGTCTTCTAAGTAC-----TTTGTATGTACC---CATTCGAA  
GGTGTGACACATATGGATGACTTCCCATT-----GCCCCA--CCAGTGGTTTAGTGGCCYAGTTTCAATAT-GAGTTT  
GA-CCCCACTGAACTAATGACATCCA-TGACGGACTCAGGTCAAGTTCCTTA-TATTGATCTGGATTGGAGCAGTTTCTC  
TGGAGCCTATCAATCTGCATTCTGCCAGT-TACATCAT-----

**MARKER 81**

>L2B\_ME

-----  
-----  
-----AAAAGATAAGCTCCTTGAGGGCAGGGACTATTTTCATTTTTTGTCTTTGTATCCCCAGTACYTAG  
CACAGTGCCTGGCACATAGTAGGTGCTTAAT-AAATGC-TTGTTGATTGACTGAT-----  
-----  
-----  
-----  
-----  
-----  
-----  
-----  
-----  
-----  
-----

>L1-1\_SH

-----  
-----  
-----  
-----  
-----  
-----  
-----  
-----  
-----  
-----  
-----  
-----TTTTTATTATAGCTTTTTATTTACAAGA  
TATATGCGTGGGTAATTTTTTCAGCATTGACCNTTGCAAACCTTCTGTTCCAACCTTTTCCCCTCCTTCCCCCACCCT  
CCCCAGATGGCAGGTAGACCAATACATGTTAAATATGTT-AAAGTATATGTT-AAATACAATATATGTATACATATCCA  
TAC-AGTTATTTTGCTGCACAAGAA-GAATCGGACTTTGAAA-TAATGTANAATTAACCTGTGAAGGAAATCAAAAATGC  
AAGCGGACAAAAACAGAGGGATTGGAAATGCTATGTAGTGGTTCA-----  
-----  
-----  
-----

>Sha DB

GAAAGTGGTTTTGTATAGCAAATTGGTAAAATCAGCCAAGGT-----AATTTT-GGAAGAAAAGGGGCAA  
TCAAAATTACTTTTTTTATGGTAGTGGTCATG-AAATTGGAAAA-GATATTTGGAGAAATATGGAGAAGATTATGCTGGT  
A-GAAAGTAGATTCT---AGAATATCTGGCCCATGAATAAA-AAGATTT---GGTTTGCAAATCTGGC-ATGTTTTG-A  
AAATAT-CCCCACCCCTGGTGGGTGCTCAA-GGGAG-CATGATCCAGGTATGCTAATATGAGAGCCATTCTTTGGAAC  
GGTTCTTCAACAAGACAAGATT--GTGGTAAATATGTGTCAGGATGCCAT-GGTCATAGGTCAGTT---GATCAAAGCAT  
CTA--TTGTGGGCA-TTGCATACCGTGTACCAGGCATTGTGGTGAACACGGA-----TACAAAGAG--TAAAATAA  
TCCCTATTT-ACAAACAGCTTATATTCTAATAGATC----TTTTT-----TTTTGTTGTAGCTTTTTATTTACAAGA  
TATATGCATAGGTAATTTTTTAGCATTGACAGTTGCAAATCCTTTTGTCCAACCTTTTCCCCTCCTCCTCACCCTT  
CCCCAGATGGCAGGTTGACCAATATATGTTAAATATGTT-AAAGTGTAAAGTT-AAATACAATATATGTATACATGTCCA  
AAC-AGTTATTTTGGTGTATAAAAA-GAGTTGGACTTTGGAA-TAGTGTACAATTAGCCTGTGAAGGAAATCAAAAATGC  
AGGCGGACAAAAATAGAGGGATTGGGAATCTATGAAATGGTTCA-----TTTTT-----CTT  
AACTTAAGTCTATTATTCTTTCCAAGTTCAAGACAAGAAG--TATTCTCTTTTCATTCTAAGATGTACTTT-CCTATCCA  
TCATATTACA-----TGAGCTG-----TAATAAAGTTTTTT-ACTTT-AACTTAGACT---AATCTATTT  
--GCATTTATTTTGTGCCTAGATTGAAT-GGGAGAACTTCAGACAAGGATGGATAAGATGGATTCTGTACTCAAAGAAG  
TGGATA

>Af1

-----TTGTATAGCAAATTGGT-AAATCAGCCAAGGT-----AATTTT-GGAAGAAAAGGAGCAA  
TCAAAATTACTTTTTTT-ATGGTAGTGGTCATG-AAATTGGAAAA-GATGTT-GGAGAAATATGGAGAAGATTATGCTGGT  
A-GGGAGTAGATTCT---AGAATATCTGGCCCATGAATAAA-AAGAATT---GGTTTGCAAATCTGGC-ATATTTTG-A  
AAATAT-CCCCACCCCTGGTGGGTGCTCAA-GGGAG-CATGATCCAGGTATCCA--TTGAGAGCCATCCTTTGGAAC  
GGTTCTTCAAAAGACAAGATT--CTGGTAAATATGTGTCAGGATGCCATTGGTCATAGATCAGTT---GATCAAAGCAT

CT-----A-TTGTGTACCATGTGCCAGGCATTGTGATGAACACTGAGGATACAGATACAAAGAG--TAAAATAA  
TCCCTATTT-ACAAACAGCTTATATTCTAATAGATCA----TTTTT-----TCATTATAGTTTTTTA-TTACAAGA  
TATATACATAGATAATTTTTCAACATTGACAGTTGCAAATCCTTTTGTCCAACCTTTTTCCCTTCTCCCCCACCCTT  
CCCCAGATGGCAGGTTGACCAATACATGTAAATATGTT-AAAGTATAAGTT-AAATACAATATATGTATACATGTCCA  
AAC-AATTATTTTGCTGTATAAAAA-GAGTTTGACTTTGAAA-TAGTATACAATTAGCCTGTGAAGGAAATCAAAAATAC  
AGGCAGACAAAA-TAGAGGGATTGGGAATTCTATGAAGTGGTTCATAGTCTAGATCA-----TTTTT-----CTT  
AACTTAAGTCTATTATTCTTTCCAAGTTCAGGACAAGAAGTGTATTCTCTTTTCATTCTAAGATGTGCTTT-CCTAGCCA  
TCATATCACA-----TGAGCTG-----TAATAAAGTTTTTT-ACTTT-AACTTGACT---AATCTATTT  
--GCATTTATTTTGTGCCTAGATCGAT---GGAGAACTTCAGAC-AGGATGGATGAGATGGATTCTGTACTCAAGAG--  
-----

>Pap

GAAAGTGG-TTTGTATAGCAAATTGGTAAAATCAGCCAAGGT-----AATTT--GGAAGAAAAGGGACAA  
TCAAAATTACTTTTT--ATGGTAGTGGTCATG-AAAT-GGAAAA-GATATT-GGAGAAATATGGAGAAGATTATGCTGGT  
A-GAAAGTAGA-TCT---AGAATATCTGGCCCATGAAAAA-AAGATTT---GG-TTGCAAATCTGGC-AAAT-TTG-A  
AAATATCCCCAC---TGGTGGGTGCTCAA-GGGAG-CATGATCCAGGTATCCTAAAAGGAGAGCCAATCTGGGAACT  
GGTTCTTCAAAGACAAGATT--CTGGTAAATATGTGTGAGGATGTCAT-GGTCATAGATCAGTT---GATCAAAGCAT  
CTA--TTGTGGCA-TTGCATACCGTGTACCAGGCATTGTGGTGAACACTGAGGATACAGATAGAAAGAG--TAAAATAA  
TCCCTATTT-ACAAACAGCTTATAGTCTAATAGATCA---TTTTT-----TTTATTATAGCTTTTATTTACAAGA  
TATATGCATAGGTAATTTTTTTCAGCATTGACAGTTACAAATCCTTTTGTCCAGCTTTTTCCCTCTT---CCCCACCCTT  
CCCCAGATGGCAGGTTGACCAATACATGTCAAATATGTTAAAAGTGAAGTTAAAATACAATACATGTATATATGTCCA  
AAC-AGTTATTTTGCTGTATAAAAA-GAGTCGGACTTTGGAAATAGTGTACGATTAGCCTGTGAAGGAAATCAAAAATGC  
AGGCGACAAAA-TAGAGGGATTGGGTATTCTATGAAGTGGTTCA-----TTTTT-----CTT  
AACTTAAGTCTATTATTCTTTCCAAGTTCAGGACAAGAAG--TATTCTCTTTTCATTCTAAGATGTGCTTT--CTATCCA  
TCATATCACA-----TG-GCTG-----TAAWA--GTTTTYT-ACTTT-AACTTGACT---AATCTATTT  
--GCATTTATTT-GT-GCTAGATCGAT---GGGAGAA-CTTCAGACAAGGATGGAT-----  
-----

>Pta

GAAAGTGGTTTTGTATAGCAAATTGGTAAAATCAGCAAAGGT-----AATTTT-GGAAGAAAAGGAGCAA  
TCAAAATTACTTTTTTATGGTAGTGGTCATG-AAATTGGAAAA-GATGTTTGGAGAAATATAGAGAAGATTATGCTGGT  
-AGGGAGTAGATTCT---AACTATCTGGCCCATGAATAAA-CAGAATT---GTTTTGCAAATCTGGC-ACATTTTG-A  
AAATATAC-CCACTCCTGGTGGGTATTCAA-GGGAG-CATGATCCAGGTATCCCAATATGAGAGCCATCTTTGGAACT  
GGTTCTTCAAAGACAAGATT--CTGGTAAATATGTATCAGGATGCCATTT-----GATCAAAGCAT  
CTA--TTGTGGGCATT-GTGTACTGTGTAGCAGGCATTGTGATGAACACTGAGGATACAGATACAAAGAG--TAAAACAA  
TCTCTATTT-ACAAGCAGCTTATATTCAAATAGATCA-----  
-----  
-----CTTTT-----ATT  
AATTTAAGTCTATTATTCTTTCCAAGTTCAGGACAAGAAG--TATTCTCTTTTCATCCTAAGATGTGCTTT-CCTATCCA  
TCATATCACA-----TGAGCTG-----TAATAAAGTTTTTT-ACTTT-AACTTGACATTTAATCTATTT  
--GCGTTTATTTTGTGCCTAGATTGAAT-GGGAGAACTTCAGACAAGGATGGATGAGATGGATTCTATACTCAAAGAAG  
CAGATA

>Scr

-----TTTGTATAGCAAATTGGTAAAATCAGCAAAGGT-----AATTTT-GGAAGAAAAGGAGCAA  
TCAAAATTACTTTTTTATGGTAGTGGTCATG-AAATTGGAAAA-GATGTTTGGAGAAATATAGAGAAGATTATGCTGGT  
AGGGGAGTAGATTCT---AACTATCTGGCCCATGAATAAA-CAGAATT---GTTTTGCAAATCTGGC-ACATTTTG-A  
AAATATTACCCTCCTGGTGGGTATTCAAAGGGAG-CATGATCCAGGTATCCCAATATGAGGGCCATCTTTGGGACT  
GGTTCTTCAAAGACAAGATT--CTGGTAAATATGTATCAGGATGCCATCT-----GATCAAAGCAT  
CTA--TTGTGGGCATT-GTGTACTGTGTAGCAGGCATTGTGATGAACACTGAGGATACAGATACAAAGAG--TAAAACAA  
TCTCTATTTTACAAGCAGCTTATATTCAAATAGATCA-----  
-----  
-----TTTTT-----TATT  
AATTTAAGTCTATTATTCTTTCCAAGTTCAGGACAAGAAA--TATTCTCTTCTCATCCTAAGATGTGCTCT-CCTATCCA



TCATATCACA-----TGAGCTG-----TAATAAAGTTTTTTTACTTTTAACTTGGACATTTAATCTATTT  
--GCGTTTATTTTGTGCCTAGATTGAATGGGGAGAACTTCAGACAAGGATGGATGAGATGGATTCTATACTCAAAGAAG  
CAGATA

>Mfa

-----TTAGTATAGCAAATTGGTAAAATCASCAAAGGT-----AATTTTGGGGAGAGAAAGAGCAA  
TCAGAATTACTTTTTT-ATGGGAGTGATCATGGAA-TTGGAAAA-GATGTTTGGAGAAATATGGAGAAGATTATGCAGGG  
TAGGGAGTAGATTCT---AGGATATCTGGCCCATGAATAAA-CAGAATT--GCTTTGCAAATCTGGC-ATATTTTGGAA  
AAATATTC-CCACCTCTAGTGGGYGCTCAAA-GGGAG-CAAGATCTAGGTATC-----  
-----CCAAAGACAAGATT--CTGGTAAATGTGTCTCAGGATGCTATTGATCATAGATCAGTT--CGATCAAAAGCAT  
CTATTGTGTGGGCATTNGTGTACTATGTACCAGCCATTATGGTGAACACTGAGGATATAGATATAAAGAG--TAAATAA  
TCCCTATTT-ACAAGCAGCTTATATTTAAATAGATCA-----

-----TCTTT-----  
--CTTAAGTCTACTATTCTTTCCAAGTTCAGGACAAGAAG--TATTGTCTTTTCATTCTAAGATGTGTTTT-CCTATCCA  
TCATA-CATAG--TACATGAGCTG-----TAATAAAGTTTTTT-ACTTT-AACTTGTACT---AATCTCTAT  
TTGCATTATTTTGTGCTTAGATTGAAT-GGGAGAACCTTCAGACAAGGATGGATGAGATGGATTCTGTACTCAAAGAAG  
TAGATA

>Meu

GAAAGCAGTTCCTTTATAGCAAACCTGGTTC AATCAGCAAAGGT-----GATTTT-----GACAGAGAGCAA  
TCAGAATTCCCTTTTTT-GTGGTAGTGATCATGAAATTGGCAAAAAAT-ATTT-GGAGAAGTGTGGGGAAGTTATGCTGTT  
-AGGGAGTAGTTCCT---AGGATGTCTGACCCATGAATAAACCAGAATA--GGTTTAAAAATCTGGCGTGTATGG-A  
AAATATCC-CCATCCCTGTTCTGTGCTCAAA-----GTGAGCATCCCAATGTGAGGGCCATCCTTTTGAATT  
CATTCTTCAAAGACAAGAAGATCTTAGTAAATGTATATCATGATGCCATTTGTGTCAGAG-ATCAGCCAATCAACAAAGCAT  
-----TGTGCAC-TACTATGTATCAGGTATTGTGATAAGCACTAAGAATATAGATTCAAAGAGAGTAAATATA  
ACCATATTT-ACAAGAAGCTTACATTCTAATAGATCA-----

-----TCTTT-----CTTACTT  
TATTTAGGTCAGTTATTCTGTCCAAGTTTGAACATGAAG--GATTGTCTTTTTATTCTAGGAT-TGCTTTTCGTATCCA  
TCATGTCACA-----TGAG-----TTATAATAAAGTTTTTC-GCTTT-AACTTCAGCT---AATCTATTT  
--GCATTTATTTTGTGTGTAGGATGAAC-TGGAGAAGCTTCAGACAAGGATGGGCAAGATGGATTCTGTACTCACAGAGG  
TGGATA

>Mdo

GAAAGTGGCTCTATATAGTAAACTGGTACAATCAGCAAAGGT-----AATTTT---GGCACAGAAAGAGT  
GATCAATTACTTTTC--ATGGTATTAATCAT--AAATGGCAAAAAATGTTTGAAGAAATATGGAGA-GGTTATGTTGGT  
AGAGTGATCCCTTTAGTTATAGGATATCTGGCCCCGAATAAACCAGAATA--GATTTACAAATCTGCCATATTTTCGG-A  
AGATATAC-C-----TTTTGTGTGCTCAGA--AGAAGCAAAATCCAGATATTGCAATGTTGGAACCATCCTTTGGAAT  
GATGCTTTGAAGACC-----TGGTAAATGTGCATCTGGATGCCATTTGGTCAAGNTGTTTCCG--GAAACAA-GCAC  
T-----TTTTGTGTACCTGCAATGTACTAGACATTGTGGTAGGTGCCAAGGATACAATATAGAA-----TAAATAA  
TCCCTACTT-ACAAGTAGCTTACATTCTAATAGGTTA-----

-----TCTTT-----  
-----CCA ACTATTATTCTTTCCAAGTTCGAACAGGAAG--TATT---TTTTATTCTAAGATGTGCTT--CCTAGCCA  
TCATTTACACATAGTTATGAG-TGATCACCTAAATTGTAATAAAGTTTTTC-ACTGT-AACTTGTGCT---AATCCATTA  
--ATATGTATTTTGTGCTTAGGCTGAAC-GGGAGAATCTTGAGATAAGGATGGACAAAATGGATTCCGTA CTCAAGGAGG  
CAGATA

>

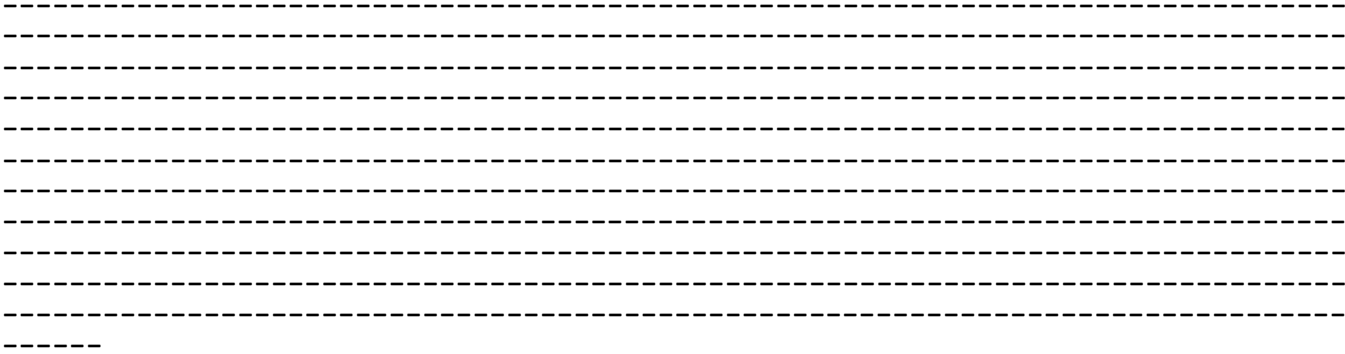



GTTA-TTTGCTGTACAAAAAGAATCAGACTCTGAAATATTGTACAA-TTAGTTGTGAAGGAAATCAAAAAATGCAGGTGGG  
CATAGATATAGGGATTGGGAATTCAATGTAATGGTTTTTAGTCATCTCCAGCGTCTTTCTCTGGGCGTAGCTGGTTCA  
GTTCACTACTGCTCCATTGGAAATGATTTGGTTGATCTCATTGCTAAGGATGGCCAGGTCCATCAGAAGTGGTCATCATA  
TAGTATTGTTGTTGAAGTATATATTGATCTCCTGGTCCTGCTCATTTCCTGAGCATCAGTTCGTGTAAGTCTCTCCAGG  
TCTTTCTGAAATCATCCTGTTGGTCAATTTCTTACAGAACAATAATATCCATAATATTCATATA-----TTGGGAAGTT-  
-----CTTAAAG---TCAGAAGTCTCTTCATTACAAGGTAAGTCCACTGGAGTAGGGAATAGAGCGTGCCTGGCAG  
AGACAAGATAGCTTCACCTACCAGTTGCSTATGGTGAACC-----  
-----  
-----  
-----

>Pap

TATCGGACAGCAAAGACCCCKGGAAGTGGTCTT-AAAGGGTATCCCTGAGAGC-CTCCGTGGAGAACTCTGGCTCCTGTT  
CTCAGGT-----GAGCTCCTA-CATCACACCTGTCATACAGTSGGAGTTTT-----CTTCTC-----  
-----TTTGGGAAGTT-----  
-----  
-----  
-----  
-----  
-----

-----ATCTTAAAG---TCAGAACYGCTCTTCACTACAAGGTAAGTCCACTGGAGTAGGGAATAGAGCGTGCCTGGCAG  
AGACAAGATAGCTTCACCTACCAGTTGCTTATGGTGAACCTGCMTAGCCCATCGCTCTTTAT--GACTTCAGTCTTAATA  
GCTCTTGGAAATCTGTAATCT--AACAAAGATGCTACAGACTGAAACAGAAC-----TGCTTGGAAATTGAC-C  
CCCAGGCTCTTATTTTCTGTAAACTCTATGG-----ATTTTATCAACCCCCCTAGTCTTGAAGCTCTTCTGAGAATGTC  
AGACAGTGTGATGTGTATT-CCCACTGT-----AGGAGCCTGGAATGAAAT

>Af1

TATCGGACAGCAAAGACCCGGGAGCTGGTCTT-AAAGGGTATCCCTGAGAGC-CTCCGTGGAGAACTCTGGCTCCTGTT  
CTCAGGT-----GAGCTCCTA-CATCACACCTGTCACACAGMTGGAGTTTT-----CTTCTC-----  
-----TTTGGGGAGTT-----  
-----  
-----  
-----  
-----

-----CTTAAAG---TCAGAAGTACTCTTCACTACAAGGTAAGTCCACTGGAGTAGGGAATAGAGTGTGCTGGCAG  
AGACAAGATAGCTTCACCTACCAGTTGCATATGGTGAACMTGCATAGCCACTGCTCTTTAT--GACYTGAGTCTTAATA  
GCTCTSWGAATMTGGAATCT--AAGAAAGATGWTACAGACTGAAACAGAAC-----TGCTSGGAATTGAC-C  
CCCAGGGTCTTATTTTCTGTAAACTCTAGGG-----ATTTTATCAACCCMCCTAGTCTTGAAGCTCTTCTGAGAATGTC  
AGACAGTGTGATGTGTATT-CCCACTGT-----AGGAGCCTGGAATGAAAT

>Scr

TATCGGACAGCAAACCCGGGAGCTGGTCTTTSTAGGGKSAATWCTGAGAGC-CTCCGYGGTGAAGTCTGGMACCTGTT  
CTCAGGT-----AAAYTCCAACATCACCCCTGTCACACAACSGGAGTTTC-----CTTMTY-----  
-----TSTGGGGAGTT-----  
-----  
-----  
-----  
-----

-----GTTGAAG---TCAGAAGTGTMTTCACAATAAGGTAAGTCCACSGGAGTAGGGAATAGAGTGTGATGGTAG  
AGTCAAGGTAGTTTCGCCTACCAATTGCCTATGGT-----

>Mfa

TATCGGACAGCAAAGACCCGGGAGCTGGTCTT--AAAGGGTATCCCTGAAAGC-CTCCGTGGAGAACTCTGGCTCCTGTT  
CTCAGGT-----GAGCTCCTG-CATCACCCTGCCACACAACCTGGCATTTC-----CTTTTC-----  
-----TTCCTGGAGTT-----

-----CTTGAAG--TCAGAAGTCTCTTTACTACAAGGTAACCTCCACTGGAGTGGGGAATAGAGCCTGCTGGCAG  
AGACA-GAGTAGTTCACCTACCAGTTGCATATGGTGAGCTTGCATAGCCACTGCTCTTTAT--GATTGAGTCTTAATA  
GCTCTTGGAATTCTGGAATCT--AACAAAGCAGATGCTACAGACTGAAAMAGAACCTTGCCTCTGCTGGAATTAAC-C  
CCCAGGCTCTTATTTTCTGTAAACTCTCTGG-----ATTTTATCAAACCTCTAATCTTGAAGCTCTTCTGAGAATGTC  
GGACAGTATAATAATATATTTCCACTGT-----AGGAGCCTGGAATGAAAT

>Meu

TATCGTACAGCAAAGACCCGGGAGCTTGTCTT--AAAAGGTATCCCTGAGAGC-CTCCGTGGAGAACTCTGGCTTCTATT  
TTCAGGT-----AAGCTACTA-TTTCACCATTGTACACAACTGG-AGTTC-----CCT-TC-----  
-----TC-AAGGAGTC-----

-----CTTTAAGGCTGAACATCTGCTTCTGCTACATGGTAACTCCACTGGAGTGAGGAAAGGATTAGGGTGGTAG  
GGAGAAGGTGGCTCATATATCAGTTTCATGTAGTGGGCCTGCATTCTCCACTGCTGTTTTAT--TGCTGAGTCTTAGTA  
GTTCTTGAGTTCTGAAACTT--AATAAAGCAGATGCTACAGAGTAAAATGGAACCTTCGCCTTCACTTGGAAATTGAT-C  
CCCCAATCTCATTCTCTGTAAACTCTCCAGCCTGAAATTTTATTGAA-TTCCTAGGCATAAAGCTCTTCTGAGAATGTC  
AGACAGTGTGTGTATT-TCCACTGC-----AGGAGCCTGGAATGAGAT

>Mdo

TATCGTACAGCAAAGACCCGGGAGCTGGTCTT--AAAAGGCATCCCTGAGAAC-CTCCGGGAGAACTCTGGCTCCTGTT  
CTCAGGT-----GAGCTACTA-TAGCTACTATATCACCCTGCTGCCAACTGTAGTTCTCTTAT-----  
-----TCTGGAGGGTC-----

-----CTTTAAG--TCAGGACATTTACTCTGCTACAAGGTAACCTCTAGAAATGAGGAATGAA--GACGAGGCAG  
GG-GAAGGTAGCCTCATATACCAGTTTCTGTTGAGGGCCTGCACACTCCACTCTTCTTCAATTGCTTTTAAATTTTATAGTA  
GCTCTTGAAATCTGGAACCTAAGAAATAAGGCACTGCA-----GTCCCTAC-TGGAATTGAC--  
-----CACTTATTTT-CTGCAAACCTTTAGCCTGACATTTTAAATTAAGCCCTAGGCATAAATCTCCTCTGAGAATGTC  
AGCCAGTGCCATGTGTTTA-CTCACTAT-----AGGAGCATGGAATGAGAT





-----  
-----  
-----  
-----GAGGA---ACTGCTGAGCAAGTACTGCTGGG  
---ATGGGAGAAAATACGGTCATGGCCATTTASTGCAGGTGGGGAGAAGATAGATCAGGAGCTGCTGAGGGAAAACCCCA  
ACTTTGGTAGTAACCTATTTTGGACCTTGAGGAAGG-AAACAG-----CCTCAGTT-GCTCATGTGTAAAAATG  
AAGAAGTGGGATCAGGTGATTTGTAAATCCACTTCATATCTAAAATCTTATGA-----ATATGGAAGCATCTTT  
GATACTTTGGAGAGGAAGCTGGCTTTTGGGGATGGCGAGTGACTGATGCCAAGGAGAGAGCAGTTCAGARGCTGTGTCCT  
TTC-----AGGTGGCAACGAGGATTCGGATTTCCGGGAGCTGCACACTGCCCGGGAGTTCTCGGAGGACG  
AGGAGG

>Mfa

TCCACCCCTGACTCCACAGATGGT-----GAGTAGACTCTGCTTCCATTTCCCTTATGATAGGCAGGCCA  
-TTTTGGGATGCTAAATGGGAAGGGGAGAGTGCAAAGAGTTCTGAGGAGGGATGAAGGCATGGGAAGTCGGCAACTCAK  
GCAAGC-----TCCTTCTTTCT--

-----  
-----  
-----  
-----AAGGAGAAATGAAGA---GTTGCTGAGGAGTACTTCTGGG  
---ATGGGAGAAAATAAAGTCACAGCCATTTAGTGGGGGTGGGGAGAAGACAGATCAAG-GT-GCTGAGGGAAAACCCCA  
ATTCTGGTAGTAACCTGTTTTGACCTTGGGGAAGG-AAACAG-----CCTCAGTT-GCTCATCTGTAAAAATG  
AAGAAGTGGGATTAGGTGATTTGTAAATTTCCCTTCTATCTAAAATCTTATGA-----ACATGGGAGCATCTTG  
GGTACTTTTGAGAAGAACCTGGCATTARGGATGGTGAGTGACTGCTGCTAAGGAGAGAGCACTTCAGAGGCTGTGTCCT  
TTC-----AGGTGGCAACGAGGATTCGATTTCCGGGAGCTGCATACTGCCCGGGAGTTCTCGGAGGACG  
AGGAGG

>Iso

-----T  
TTCTGGGGGTGATAAATGAGGAGGGGGATGTAGAAAGCCCTCTGAAGAG-----TGGTGACTCACG  
ATAAAGTCATAG-----TTTCT--

-----  
-----  
-----  
-----AAGGAGAAATGAGGA-----AGAAGTACTGCTGGG  
G--TTGGG-AAAAATAAAGCCATAGTCATTTAATTCGAGTGGAGAGAAGAMACATCAGGAGTTGCTGAGGGAAAATCCCA  
ACTTTGGGAATAACCT-----TGGGGGAAGG-AAATAG-----ACCCGCAAGTT-GCTTCTAGGTAAAAATG  
AAAAAGTGGGATMCGYATTT-GTGAATTCGTTCCTTATCTA-AATCTTGTGA-----GCATATRAGGATCTCT  
GGTACTTTGGA-----

>Meu

TCCACTCCTGACTCCACAGATGGT-----AAGTAGAGTCGACCTTCATTTCC---TTTATGGCAAGGGCA  
TTTCTGGGGTGCTAAAT--GAAGTGGGGAGTGCAAAAAGCT-----GCGAGGAAAAGTCGGTGAAGTCAAG  
GTAAGCTCATAC-----TTTCT--

-----  
-----  
-----  
-----AAGGAGAAATGAGAAGGAACCGCTGAGAAGGTACTGCTGGG



GTGTGTGGGAAAATAAAGTC--AGCCATTTAGTAACAGTGCGGAGAAGACAAAGTAGGAGCTACTAAGAAGAAATCCCA  
ACTCTGGTAGTAACCTGTTTTGAACTTGGGGAAGG-AAACAG-----AGTCTCA-GTTGCCTCACCTGTAAAAATG  
AAGAAGTGGGATTAGGTGATTTGTAAATTCATTTCCTTATCTAAAATCCTGTGA-----GCATGGGGGGATCTTC  
T-----GAGAGGAATCTGGAGTTTAGAGATGGTGGGTGACTGGCGCTAAGGGAACAGCGTCCTTCC-----  
-----AGGTGGCAATGACGATTCGGATTTCCGGGAGCTACACACTGCTCGTGAGTTCTCTGAGGAG  
GAAGAG





A-----TGGTCTTTGAAGCCCCTTCTAACTAGTTAAATAAAGCTGATCAGTTGAAACATTGAATGCTATTTAATGAT  
ACTATTGAATTTTAAAGTTTtaggggaagattactatTTTTCATAATGTTTATGTTTTTC-----AGGAAAAT  
CCCATTTACGTAAGGCTATT

>Sha CPH

-----CAACTAGGT-----AAATT-----GTT  
TGTATGGGAAATAGGGAAAGTGTTCCTCCCAAAAAGCTCATTAAAAATTATTTCTCTAAGGTCTGGCATATCTAT-GTGC  
-TTTCCCATGCTCCAGAATGTT-CCTAAAGGATAATAGGTTGTAAATAATCATGATTATTCTGCGTTGTAGT-----  
-----AGTTACTCAAGTTTT-----AAAGTT-----

-----GCATTTCCAAACATGTAATTTCA-CAAGTT-ATTCTTAAATTATCTAAGCTTATATTGGTT--  
CATGTTTCGAAATTACCAAATACCTTTTCCATATTCATAGTAGTCTCGTAGCTAGA-----ATTGTG-----TT  
TTTTTTTTTTTAAATT-AT-ATTTTTTTTAAAT-TAATAGCCTT-TATT-ACAGGATATATGCATGGGTAACCTT-ACAGCA  
TTAACAATTGCCAAACCTCTTGTTCCAATTTTTTACCTCTTACCCCCACCCCCTCCCCCAGATGACAGGATGACCAGTA  
GATGTTAAATACATTAAAATATAAATTAGATACACAATAAATATACATGACCAAACGTTATTTTTGCTGTACAAAGAGA  
ATCGGACTCTGAAGTATTGTACAATTAGCTTGTGAAGGAAATCAAAAATKCAGGTGGGCATAAATATAGGGATTGGGAAT  
TCAATGTAATGGTTTTTtagtcatctccagagttctctgggCGTTCGTAGCTAGA----TTTGT-----TGAC  
CATTTAGTTATCTTATAAGCAAGAGTTAAGGTTTTGCAGATGCATTTAATTGGTCTTCAAGCG-----GACCAGA  
C-----

-----TAG--ACAATAGCTCTTTTTTTT-CTGCT  
TCATGAATGAGAAACCATTGATCAGAAGGTCTGGGACTGACTT-----

-----ACTC-AGTTTCGTCTTCTGTAAAGCAAAACAATTGAA  
A-----TGGTCTTTGAAGCCCCTTCTAACTAGTTAAATAAAGCTGATCAGTTGAAACATTGAATGCTATTTAATGAT  
AYTATTGAATTTTAAAGTTTtaggggaagattactatTTTTCATAATGT-----

>Dge

ATTTACACCTTTGGCAACATTGAAGAACAAAAATGAACGGAAACAACCTAGGT-----AAATT-----GTT  
TGTATGGGAAATAGGGAAAGTGTTCCTCCCAAAAAGCTCATTAAAAATTATTTCTCTAAGGTCTGGCATATCTAT-GTGC  
-TTTCCCATGCTCCAGAATGTT-CCTAAAGGATAATAGGTTGTAAATAATCATGATTATTCTGCTTTGTAGT-----  
-----AGTTACTCAAGTTTT-----AAAGTT-----

-----GCATTTTCGAACATGTAATTTCA-CAAGTT-ATTCTTAAATTATCTAAGCTTAGATTGGAT--  
CATGTTTCAAAATTACCAAATATCTTTTCCATATTCATAGT--TCTCGTAGCTAGA-----TTTGT-----

-----TGAC  
CATTTAGTTATCTTATAAGCAAGAGTTAAGGTTTTGCAGATGCATTTAATTGGTCTTCAAGTG-----GACCAGA  
C-----

-----TTAG--ACAATAGCTCTTTTTTTT-CTGCT  
TCATGTATGAGAAACCATTGATCAGAAGGTCTGGGACTGACTT-----

-----ACTC-AGTTTCGTCTTCTGTTAAGCAAAACAGTTGAA  
A-----TGGTCTTTGAAGCCCCTTCTAACTAGTTAAATAAAGTTGATCAGTTGAAACATTGAATGCTATTTAATGAT  
ACTATTGAATTTTAAGTTTAGGGGAAGATTACTATTTTCATAATGTTTTATGTTTTTC-----AGGAAAAT  
CCCATTTACGTAAGGCTATT

>Pap

-----TGA-CGG-AACAAC TAGGT-----AAATT-----GTT  
TGGATAGGAAATAGGGAAAGTGTTCTCCCAAAAAGCTCATTAATAAATTACTTCTCTAAGGTCTGGCATATCTAT-GTGC  
-TTTCCCATGTTCAGAAATGTT-CCTAAAGAATAATAGGCTGTAAATAATCATGATTATTCTGCTTTGTAGC-----  
-----AGTTACTCAAGTTTA-----AAAGTT-----

-----GCATTTTCGAACATGTAATTTTCG-CAAGTT-ATCCTTAAATTATCTAAGCTTAGATTGGAT--  
CATGTTTCAAATTACCAAATACCTTTTCCATATTCATAGT--TCTCGTAGCTAGA-----TTTGTT-----

-----TGAC  
CATTTAGTTATCTCATAAGCAAGAGTTAGGGTT-TGCAGATGCATTTAATTGGTCTTCAAGCA-----GACCAGA  
C-----

-----TAG--ACAATAGCTCTTTTTTTTCTGCT  
TCATGTATGAGAAACCATTGGTCAGAAGGTCTGGGACTGACTT-----

-----ACTC-AGTTTCCTCTTCTGTTAAGCAAAACAATTGAA  
A-----TGGTCTTTGAAGCTCCTTCTAACTAGTTAAATAAAGCTGATCAGTTGAAACATTAAATGATATTTAATGAT  
ACTATTGAATTTTAAGTTTAGGGGAAGATTACTATTTTCATAATGTTTTATGTTTTTC-----AGGAAAAT  
ACCATTTACGTAAGGCTATT

>Af1

-----TGA-CGG-AACAAC TAGGT-----AAATACTATTGTT  
TGTATGGGAAATAGGGGAAGTGTTCTCCCAAAAAGCTCATTAACAATTACTTCTCTAAGGTCTGGCATATCTAT-GTGC  
-TTTCCCATGTCCAGAAATGTT-CCTAAAGGATAATAGGCTGTAAATAATCATGATTATTCTGCTTTGTCTGTT-----  
-----AGT-ACCCAAGTTTA-----AAAGTT-----

-----GTATTTTGAACATGTAATTTTG-CAAGTT-ATTCTTAAATTATCTAAGCTTAGATTGGAT--  
CATGTTTTAAAATTACCAGATACCTTTTCCATATTCATAGT--TCTCGTAGCTAGA-----TTTGTT-----

-----TGGC  
CATTTAGTTATTTTATAAGCAAGAGTTAGGGTTTTGCAGATGCATTTAATTGGTCTTCAAGCA-----GACCAGA  
C-----

-----TAG--AYAGTAGCTCTTTTTT--CTGCT  
TCATGTATGAGAAACCATTGGTCAGAAGGTCTGGGATTGACTTCCAGCTCTACTAAATTTAGAGTTGGAGGACCT-GGAA  
ATGTAAAA--TGAATAAAACTTATACATAAATAATTGTA-GTCCAAAAGTACTAGAAAGCAA-----GT  
ATAAATTGGGTACTTAGTCAGAGGTGGAAAAGAAAATCTT-----GGAGATG  
TGATTTGAGTTAGGCTTATAAGAATAGATAGGATTTACATAAGCAAAGG-----TTCAGAGAGCA-----

-----GAAGGAATAGGTTGAATTGTTATGACCATGGGTAATATACTT-AATTTCCCTCTTCT--AAAGCAAAACAGTTGAA  
A-----TAGTCTTTGAAGCTCCTTCTAACTGGTTAAATAAAGCTGATCAGTTGAAACATTAATGCTATTTAATGAT  
ACTATTGAATTACAAGTTTAGGAGAAGATTACTATTTTCATAATGTTTTATGTTTTTC-----AGGAAAAT  
CCCATTTACGTAAGGCTATT

>Scr

AGATTACACTTTGGCAACATTGAAGAACAATAATGAACGGAAACAACCTAGGT-----AAATACTATTGTT  
TATATGGGAAACAGGAAAGTGTCTTCCCAAAAAGTTCATTAATAATACCTCTCTAAGGTCTGGCATATCTAT-GTGC  
-TTTCCCATGCCTCAGAATGTT-CC-AAAGGATAATAGGCTGTAATAATCATAATTATTCTGCTTTGTAGT-----  
-----AGTTACTCAAGTTTA-----AAAGTT-----

-----GCATTTTTGAGCATATAATTTTG-CAAGTT-ATTCCTAAGTTATTTAAGCTTAGATTGGAT--  
CATGTTTCAAATTAACAAATACCTTTT-TTATATTCATAGT--TCTTGTAGCTAGA-----TTTGT-----

-----TGGC  
CATTTAGTTATCTCATAAGCAAGAGTTAGGGTTTTGCAGATGCATTTAATTGGTCTTCAAAA-----GACCAGA  
C-----

-----TAG--ACAATAACTCTTTTTT--CTACT  
TCATGTATGAGAAACCATTGGTTCAGAAAGTCTGGGATTGACTTCTAACTCTACTAAATTTAGAGTTGGAGGACCT-GGAA  
ATGTAAGGTTAAATAAAAC--ATATGTAATAAATTGTA-ATCCAAAAATACTATAAA-----GT  
ATAAATAGGATACTCAGTCAGAGTTGGAAAAGAAAATCTT-----GTAGATG  
TGATTTGAGTTAGGCTTATAAGAATAAGTAGGATTTACATAAGCAAAGGTTTCAGAGTCAGAAATATTCAGAGAGCA----

-----GAAGGCATAGGTTGAATTGTTATGCAA-----TATACTC-AATTTCCCTGTTTCAGTAAAGCAAAACAGTTGAA  
A-----TAGTCTTTGAAGCTCCTTCTAACTAGTTAAATAAAGCTGATCAATTGAAACATTAATGCTATTTAATGAT  
ACTATTGAATTTAAGTTTAGGGGAAGATTACTATTTTCATAATGTTTTATGTTTTTC-----AGGAAAAT  
CCCATTTACGTAAGCTAT--

>Mfa

-----AAATGA-CGGA-ACAATTAGGT-----AA-TATTATTGTT  
TATATGGGAAATAGGAAAGTGTCTTCCCAAAAAGCTCATTAAAAATTATCTCCCTAGGGTCTGGCATATCCAC-ATGC  
-TTTTCCATGCCAGAGTGTT-CCTAAAGGATAATAGATCATAATAATCATGATCATTCTGCTTTGTAGT-----  
-----AGTTACTTAAGTTTA-----AAAGTT-----

-----GCATTTTTGAATATATAATTTTG-CAAGTT-ATTCCTAATTATCTAAGCTTAGATTGGAT--  
TAGGTTTCAAATTAACAAATACCTTTTCCATATTCATAGT--TCTTGTAGCTAGA-----TTTGT-----

-----TGGC  
AATTTAGTTATCTCATAAGAAAGAGTTAGGGTTTTGCAGATGCATTTAATTGGTCTTCAAGAA-----GACCAGA  
C-----TAGGGCAGCTAGGTGGTGCAGTGGATAGAGCACCAGCCCTGAAGTCAGGAGGACCATGAGTTCAAATCTGGTC  
TCAGACACTTAACATTCCTAGCTGTGTGACCTGGGCAAGTCATTTAACCTCAATTGCCTCAGCAAAAAGCAAGGAAAA  
AAAAAAAAAATGAAGAAGAT-----GACCAGAC-----TAG--ACAACAGCTCCTTTTT--CTGCT  
TCATGTATGAAAAACCATTGGTCAAAAAGTCTAGGATTGCCTTCTAGCTCCACTAAATTTAGAGTTGGAGGACCT-GGAA  
ATGTAAGGTTAAATAAAATATACATAAATAACTGTAACCCAAAATGATATGTGCAAAGGACTATAAAGCAAATGTA  
AATAGGATACTTGGTTGTTAGAGATAGAAAAGAAAATCTTG-----GGAGATG  
TGATTTGAGTTAGGCTTATGAGGATGGGTGGGATTTATATAAGCAAAGGTTTCAGAATCAGGAAAATGTAAGGCCTATTCA

GAGAG-CCG--AAGGAATAGGCTAAATTGTTATGAC-----  
-----  
-----CTTGGGCAATATACTTAATTTTTCTGT-ACCTT-AACTTCCTCTTCTGTAAAGCAAAACAGTTGAA  
TTAAA----CAGTCTTTGAAGCTTCTTCTAACTATT----TTAAACTGATCAATTGAAACATTAATGTTATTTAATGAT  
ACTATTGAATTTTAAGTTTAGGGGAAGATTACTAATTTGA-----  
-----

>Pgu

-----AAATGAGCGG-AACAATTAGGT-----AA-TACTATTGTT  
TGTGTGGGAAAATAGGGAAAGCCTTTCTCCCCAAAAAATCATAAAAAGTTACCTCCCTAGGGTCTGGCATATCCAT-GTGC  
-TTTCCCATGCTCCAAAAAKGATCCTGAAGGATAGTGAGCTGTAAAT-GTCATGATCATTCTGCTTTGTAAT-----  
-----AGTTATTCAAGTTKG-----AAAGT-----AGTGTTTTTGGGGGCAGCTAGGTGGC  
GCAGTGAATAGAGCACCAGCCCKGGAGCCAGGAGTACCTGGGTTCAAATCCAGCCTCAGACACTTAATAATTACCTAGCT  
GTGTGGCCTTGGGCAAGCCACTTAACCTCATTCCTAGCAAAAATAAAAAAAGAAAAAGAAAAAGAAAAA-----  
-AAAGTT-----GTGTTTTTGAATATGTAATTTTGTGATAATTACTCTTAAATCAACAAGGCTGAGATTGGA---  
-----CC-AATTAACAAATACC-----ATACATTCATAAAT-TCTTGAAGCTAGA-----TTTGAT-----  
-----  
-----  
-----  
-----

-----AGGCAGTTTAGTTGTCTT-AAGAC-----CAATGTA  
C-----

-----TAGAAACCAAAGCTTCTCTTTTGCTGCT  
CCTTGCATGAAAAATCATTGATCAGAAGATTTGGGACTGAGTTCCAGCTCTGCTAAATTTAGAGTTGGAGGACCTGGGAA  
AAGTCAAAGGCAAAATAAGACC-----TACAGTAACACAAAA---TGGTATGTGCTAAGTACCATAAAGCAAGA  
ATAACCAGGATACTCAGTCAGAGGTGTAAGAAA-TCTTTAGGCAAGAGTGATCAGAGAAGGCATCCTGGA-GAAGATG  
GTATTTGAGTTAGGCTTGTAAGGATGGGTAGGATTTCCATACTTTGAAA-----ATAGAAGAAAAAGGCA-TCCT----C  
TGGAG-GCCAAAACCATAAGCAAAGGTCGGTCAGGAAAACCTAAGGCCTCTTCAGAGA-----  
-----GCTTCAGGAATTCT  
TTGAATTGTATGACCTTGGGCAATATGAG---TTTTCTGT-ACCTT-AATTCCTCCTCTGTAAAGCAAAGCAATTGAA  
T-----TAGTCTTTGAAGCTCCTTCTAGATATT--AATAAAGCTAATCAGTAGAAACATTAATATTTACTTAATGAT  
ACTACTGAATTTTAAATTCAGGGGAAAACCTGTAATTTTGA-----  
-----

>Meu

ATTTACACCTTTGGCAACACTGAAGAACAAAAATGAGCGGAAACAACCTAGGT-----AAATACTATT-TA  
CGTATGGGAAAATAGGGAAAGTATTGCCCCCAAAAGCTCATAAAGA-CTAGCTCCCTGGGATTTGGCATATCCATAGTGC  
TCCCCCATGCTCCAGAATGTT-CCTAAAGGATAGTGGGCTGT----GTCATGATTACTCTGCTTTGTAAGT-----  
-----AGTTATTCAAGTTTG-----AAATTT-----  
-----

-----GCATTTTTGAATATGCAATTTTT-CAAGTT-ATCTTAAATTATCCAGGCTGAGATTGGATCA  
GATGTTTCAGAATTAACAAACACTTCTTCTACATTCATAGT--TCTGTAGCTGGA-----TTTGAT-----  
-----

-----TGTC  
AATTGAGTTATCTCATAAGCAAGAGTGAGGTTTTTGCAGATGCATTTAATAGGCTTCAAGAA-GACCAGAT-GATTCTA  
T-----

-----TAGAAAACAGAGCTCTTTTTT-GCTGCT  
CCATGCATGAAAAACCATTGGTCAGAAGACCTGGGATTTAGGTTCCAGCTCTGCTAAATTTAGAACTGGAAGACCTA-GAA  
ATGAAAAAGGAAAGATTT-ATATATACATA--AATAACTAACACAAAA---GGGCATGTGATAAGTACTATAAAACAAAT  
ATAAACAGGATACTGAGTCAGAGGTGAAAAAGAAA-TCGTTGGCCAGAAGTGTCAGAGG-AGGATCTTAGA-GGTGATG

GGATTTGAGTTAGGATTATAAGGATGGGTCAATTTTCCACATTTTGAGAA-TGGGGGTAAGGAAAAGGCA-TCCA----A  
GGGAGACCG-AGTAACATAAGCAAAGGTCAGTCAGGAAAACCTAAGGCCTATTCATGGA-----  
-----GCAGCAGGAATAGT  
CTGAATTGTATGACC-----TTGGGCAGTGTCCCTT-AATTTTCTTCTCAGTAAAGCAAAGCAATTGAA  
CTAAATAACTAGTCTTTGAACCTCCTTCTAGCTGTT--AATAAAGCTGATCAGTTGAAACATAAAATGCTATTTAATGAT  
ACTGTTGAATTTCAAATTTAGA-----TGATTTTGATAATGATTTATGTTTTTC-----AGGAAAAT  
CCCATTTACGTAAAGCCATT  
>Mdo  
ATTTACCCCTTTGGCAACATTGAAAAACAAAAATGATCGGAAACAACCTAGGT-----AAATACTATTATT  
TATATGGGAAGTAGGGAAAGTAGTACCCTCAAAAAGCTCATCAAAA-TTACCTCCCTGGGGTTTGGCATATCCAT-GTGC  
TTTTTTTTATGCTCTAGAATGTT-CCTAAA-GATAGTGGGATATAAAT-GTCATAATCATCCTGCTTTGTTTTCAAATTCC  
TTTTGTCTCTTTGAAAATAATTACTCAACTCTG-----AAAGTT-----  
-----  
-----ACATTTTTGAATATGTAATTTTTTATAAGTT-ATTTTAAAATTATCTGGGCTTAGATTGGATCA  
CATGTCTCAAAATTAACAAATACTTCTTT----CTTCATAGT--TCTGTAGCTAGA-----TTTAAG-----  
-----  
-----TGGT  
AATTTAGTTATCTCATAGACAAGAGTGAAATTTTT-TAGATGCCATGG-----ACTAGGA-----GAATTTA  
C-----  
-----TAGAAAACAGAGCTTCTTTTT-GTTGTT  
TGCATGA--AAAAATTATTGGTCAGAAGAACTGGGTTTGAGTTCCAGCTCTGTTGG-----TGGAGGACTTT-GAA  
ATGTGGTAGGTAAAATA--AGACATATAAAAAATAATTGTAATACAA---ATGGCATGTGGATTGTACTATAAAACAAGT  
GTAAAAAAGATTCTCATAGAGT---CAGAAATGGA-TCATTTTCTGGGGTGATCAGAGA-AGGATTCATGGAAGAGATG  
GGATTTGAGTTAGGCTTATGAGGATAAGTAGGATTTCTATACTTTAAGGA-----GGGAGGAAAAGGCAG-----  
-----AAGATAAGCAAAGATTCAAAGTCAGGAAAACCTAAGGATGTTTCATAGGGTAGCAATAATAATAATAAT  
TGTATAACCTTAGGAAATTTACATTTATCACCTCTCAACCTTTTGGCTAAAATCAAGTGTGTGGAAATATACTTTTTTCC  
TGTACCTTAAGGTTAATTAAGGAAATTAAG--CTTTTCTGTACCTCAAATTTCTTCTTTGTAAGCAAAGCAGTTGAA  
TTAA----GAAGTTTTTAAAGTTTCTCCTAGCTCTGTTTCATAAAGGCGATCAGTTGAAATATTAATTTCTATTTCAACAAT  
GCAATTGAATTTTAAATATGGGAGGTTAAAA---TTTTTGGAAATGGTTCATATCTTC-----AGGGAAT  
CCCATTTACGTAAAGCTATT





-----GATTCTGGGAGGCAGAAATTAGGCAGC-----AGAAGACAGCATATGCGAATGCACAGAAGAGG  
AAGATAGAAGTATTAAGGGAATATCACTGCACATTCTCATCATTGGTCTGCGTTAGGAACCATCTGGGCTTGGTCTT-CT  
TCCACATAGTACTCTGGAACATTGCGTA-TTTTGTTCCTTCGTCTGTTCTACT-AGAAGGCAAATGCATAT-----  
-----  
-----

>Afl

-CTTAAGTAAGTT-GAGCT-GGGGAAA-TT---AAGGAAGAGATAACTGAATGAGCAAGGGAGC-TTTCTGGGTGCTAGT  
GGGACAAAAGAT-AAAAATAATTCTTGCCCTCAAAAAGATTAATAGATATAATAGATACACAAAAA---TATAGTAGGAG  
GTAAA-CTGAAGAAGGAAAGGGTGTGAG--AAATTTGAGGAGAGGGTTCAAAGAGAA--CTTCATGGAGAAGACACCTGA  
ACTGAGCCTTAAAAATG-----GGCAAG----ATTTATACTCTTTCTATTATTGTTTGGCTTGTATTTTTGTTTT  
TCTTCCCAGGTTATTTTTATCTTCTTCTGAATTTGATTTTTCTTGTGTAGCAAGACAACCTGTATAAATATATATACATA  
TATCATA-----TTTAACATATACTTTCTAACATATTTAACATGTATG  
GGACTACCTGCCATCT----AGGGGAGGGGGTGGAGGGAAGGAG-----TTGGAACASAAGTTTTTGCAAGGGTCAG  
TGTTGAAAAATTACCCATGCATATGTTTTGTCAATAAAAAGCTATTTTTTAAAAAGATG-----GGCAAG-----  
-----GATTCTGGGAGGCAGAAATTAGGCAGTGGTACATTCTAGCCATGGAAGACAGCATATGTGAATGTACAAAAGAGG  
AAGATAAAAAGTATTAAGGGAATATCACTGCACATTCTCATCATTGGTCTGCGTTGGGAACCATCTGGGCTTGATCTT-CT  
TCCACATAGCACTCTGGGACATTGTATA-TTTTGTTCCTTCATCTGTTCTACTTAGAAGGCAAATACATATCTATTAATT  
TTTCTGTAACCTCCTAAGGGTTGTGTTATTTGTTTTATTTAAAGGAAAAGGGG-----TGAGGATGCTGATG  
GTAGTGATGCTGATAATGAGC-ACCAATAGGTGATCTGTAACCTAGTCCTTTTACATTTTGTGCAGTTTGTGCAGAACT-  
TGCTGGGTGATGAAGGACTC-AATATCTTCTGGAACATTTA

>Scr

-CTTAAGTAAGTTGGAATTGAGGAAAAATT---AAGGAAGAGATAACTGAATGGGCAAGGGAGCTTTCCTAGGTGCTAGT  
AGGACAAAAGATAAAAAATA-ATTCTTGCCCTCAAGAAGATTAATAGATAC----GATACACAAAAA----TATAATAGGAG  
GTAAA-CTAAGGAAGGAAAGGGTGTGAG--CAACTGAGGAGAGGGTTCAGAGAGAA--CACCT-----GA  
ATTGAGCCTTAAAGATG-----GGCAAG----ATTTCTATTCTTTCTATTATTGTTTGGCTTGCATTTTTGTTTT  
TCTTCCCAGGTTATTTTTATCTTCTTCTAAATCTGATTTTTCTTGTGTAGCAAGACAACCTGTATAAATATATATATACA  
TATATTATA-----TTTAACATATACTTTCTAACATATTTAACATGTATG  
GGACTACCTGCCATCT----AGGGGAGGGTGTGGGGGGAAGGA-----  
TGTTGAAAAATCACCCATGCATATGCTTGTCAATAAAAAGCTATTTTT-AAAAAGATG-----GGCAAG-----  
-----GATTCTTGAAGGCATAAATTAGGCAGTGGTACATTCTAGCCATGGAAGACAGCATATGTAAATGCACAGAAGAGG  
AAGATAAAAAGTATTAAGGATTATCACTGCACATTCTCATCGTGGGTCTGCATTGAAAACCATCTAAGCTTGGTCTT-CT  
TTCTCATAGCACTCTAGGACATTGTATA-TTTTGTTCCTTCATCTGTTCTACT-AGAAGGCAAATTTGTATCTATTAATC  
TTTCTGTAACCTCCTAAGAGTTGTGTTATTTCTGTATGTTTTATTTAAAGG-AAAGGGT-----TGAGGGTGTGATG  
GTAGTGATGCTGATAATGAGTGACCAATAGGTGGTCTATAACCTAGTCCTTTTGCATTTTGTGCAGTTTGTGCAGAACT-  
TGCTGGGTGATGAAGGACTCAAATATCTTTTGGAGCATTTA

>Mfa

CCTTGAGTAAGTTGGAGCTGGGGGAAAAATT---AAGGAAGAGATAGTTGAATGGGCAAGGGAGCTTTCCTAGGTACTAAT  
GGGACAAAAGAT-AAAAGCAATTCTTGCCCTCAAGAAGATTAATAGATACAATAGATACACAAAAA---TATAGTAGGAG  
GTAAA-CTGAGGAAGGAAAGAGTGTGAG--CACCTGAGGAGAAGGTTTCAGAGAGAG--CTTCTTGAGAAAACACCTGA  
ACTGAGCCTTAAAGAGG-----GGCAAG-----  
-----  
-----

-----GATTCTGGGAGGCAGAAATTAGACAACGGTACTTTCTAGACATGGGAGATCGCATGTGTGAATGCAGAGAAGTGG  
AAGATAAAAAGCACTAAGGGAATATCACTGCACATTCTCATCATGGGTCTGTGTAGGGAACCATCTGGCCTTGATCTT-CT  
CCCACATAGCACTCTGGGACATTGCCTGTATTTTTATTTCTTCTCTATW-AGAAGGCAAATCCATATCTATTAATT  
TTTCTGTAACCTCCTAAGGGTYGTGTTATTTCTGTATGTTTTATTTAAAGG-AAAAAGGGA-----TGAGGATGCTGATG  
GTGGTGATGCTGATAATGAGCCATCAATAGGTGGTCTGTAACCTAGTCCTTTTAYATTTTGTGCAGTTTGTGCAGAACT  
TGCTGGGTGATGAAGGGCTCAAATATCTTCTGGAGCATTTA

>Pgu

CCTTGAGTAAGTTGGTGTAAACAGAC-----AATTAAGACATAGGAATGTGGGCAAGATAGCTATCCTAGGTGTTA-G  
GGGACGAAGATTAGAAACAATGCTTGCCCTAGAG-----TAGATATAAATAACACAAATAATTACATAGTAGGAG  
GCAAG-TTGAGGAAGGAGAGAGAGCACGAACAACCTTGTGGGGATAGGATAGAGATGA-----TACCTGA

GCTAAGCTTTGAAGGT-----AGACAG-----  
-----  
-----  
-----  
-----AGAGAT-GAGGTAGTAA-----TACATTCTAAACATGGGAGACAGTTTGTGTGAATGCTTATAGATAG  
AAGATAAAAAGTAGTGAGGG-----  
-----  
-----GGAACTCCTAAGGGTTGTGGGTTTTGGGTGTGGG-ATG-----AGGGATAAGGAAGGATAAGGATGTTGATG  
G-GGTGATAACAATAATGAACCACCAATGTAACC-----  
-----

>Iob

CCTTGAGTAAGTTGATGCTAACAAAC-----AGTTAAGACATAG-----CAAGATAGCTATCCTAGGTGCTA-G  
GGGATGAAGATTAGAAACAATGCTTGCCCTAGAG-----AAGATATAATAAATACACAAATAATTACATAGTAGGAG  
GCAA-TTAAGGAAGAAGAGAGAGCATGAACAACCTGTGGGGATAGGATAGAGATGA-----TACCTGA  
GCTAAGCTTTGAAGGT-----AGACAG-----  
-----  
-----  
-----  
-----AGAGAT-GAGGTAGTAA-----TACATTCTAAACATGGGAGACAGTTTGTGTGAATGCTTATAGATAG  
AAGATAAAAAGTAGTGAGGG-----  
-----  
-----GGAACTCCTAAGGGTTGTGGGTTTTGGGTGTGGG-ATG-----TTGATG  
G-GATAATAACAATAATGAACCACCAATGTAACC-----  
-----



TTTTGTT-----ATTTTTTATATTAAAGCCTTTTATTTTCAAACATACACATGGATAATTTTTCAA  
CAATGACCCTTGCAAACCTTGTGTTCTAATTCCTTCTTCT-----ACCTTTTCTCCTAGATGGCAAGCAATCCA  
ATATATGTTAAACATGGTAAAATATATATGTTAAATA-----  
-----  
-----

-----TTTAACATGTATTGTTCTACCTGCTATCTGGGAGAGGGGGGTAGA  
GGGAAGGAGGGGAAAAATTGGAACAAAAGGTTTGGCAATTGTCAATGCTGAAAAATTACCTGTGTATATATATTGTAAT  
AAAAAGCTATAATAATTA AAAACAAAAACAAAAA-----ACCCCTATTATCCCATAATTAGATTCTCAGTGTA  
AAGATCTCTTACCTTATAAT

>Sha CPH

-----TCATTACTGGTGTCCAAATGAATGTGTACCTA-----TCAAATAAA  
-----CACAGATTG-----CGTATACTTATTGTGTATCTAAGTTATATTTTAATATATTTAACATCTACTGGTC  
ATCCTGCCATTTAGGGGAGGGGGTGGGGGGGTAAGAGGTGAAAAATTGGAACAAGAGGTTTGGCAATTGTTAATGCTGT  
AAAGTTACCCATGTATATATCCTGTAAATAAAAGGCAATTAAATAAAAAAAAAAAAAAAAAA-GAAAACCAGGKAAAACAGG  
AGARAAAAAAAA-----CACAGATTG-----CTCCGTGGGTTATTACAGAAATGATAAACAATGAA-T  
TTTTGTT-----ATTTTTTATATTAAAGCCTTTTATTTTCAAACATACACAYGGATAATTTTTCAA  
CAATGACCCTTGCAAACCTTGTGTTCTAATTCCTTCTTCT-----ACCTTTTCTCCTAGATGGCAAGCAATCCA  
ATATATGTTAAACATGGTAAAATATATATGTTAAATA-----  
-----  
-----

-----TTTAACATGTATTGTTCTACCTGCTATCTGGGAGAGGGGGGTAGA  
GGGAAGGAGGGGAAAAATTGGAACAAAAGGTTTGGCAATTGTCAATGCTGAAAAATTACCTGTGTATATATATTGTAAT  
AAAAAGCTATAATAATTA AAAACAAAAACAAAAA-----ACCCCTATTATCCCATAATTAGAWTTC-----  
-----  
-----

>Dge

-----TCATTACTGGTGT--CAATGAATGTGTACCTA-----TTAAAATAAA  
-----CACAGATTG-----  
-----  
-----CTCCGTGAAA-----TGATAAACAATGAA--  
-----TTTTTTTATATTAAAGCCTTTTATTTTCAMAACATACACATGGATAATTTTTCAA  
CAATGACCCTTGCAAACCTTGTGTTCTAATTCCTTCTTCT-----ACCTTTTCTCCTAGATGGCAAGTAATCCA  
ATATATGTTAAACATGGTAAAATATATATGTTAAATA-----  
-----  
-----

-----TTTAACATGTATTGTTCAACCTGCTATCTGGGAGAGGG--ATAAG  
GGGAAGGAGGGGAAAAATTGGAACAAAAGGTTTGGCAATTGTCAATGCTGAAAAATTACCCATGTATATATATTGTAAT  
AAAAAGCTATAATAATTA AAAACAAAAACAAAAA-----ACCCCTATTATCCCATAAGCAGATTCTCAGCATA  
AAGATCTCTTACCTTATAAT

>Pap

AAACATCTGTCCTTTGGGTCTTTTTTCTATTACTGGTGTCCAAATGAATGTGTACCTA-----TTAAAATAAA  
-----TACAAGATTG-----  
-----  
-----CTCCGTGGGTTACTACAGAAATGATAAACAATGAA-T  
TTTTGTT-----ATTTTTTATATTAAAGCCTTTTATTTTCAMAACATACACATGGATACTTTTTCAA  
CAATGACCCTTGATAACCTTGTGTTCTAATTCCTTCTTCT-----ACCTTATCTCCTAGATGGCAAGTAATCCA  
ATATATGTKAAACATGGTAAAATATATATGTTAAATA-----  
-----  
-----

-----TTTAACATGTTTTGGTCAACCTGCTATCTGGGAGAGGGG--TAGG

GGAAAAGAGGGGAAAAATTGSAAAAAAGGTTTGGCAATTGTCAATGCTGAAAAATTAGCCGTGTATATATCTTGTAAT  
AAAAAGCTATAATAATTAAAAACAAAAACAAAAA-----ACCC-TATTATCCCATAAGCAGATTCTCAGCATA  
AAGATCTCTTACCTTATAAT

>Scr

AAACATCTGTCCTTTGGGTCTTTTTTCTATTACTAGTGTCCAATGAATGTGTACCTATTAAAATAAAATTTAAAATAAA  
-----CACAGATTG-----  
-----  
-----

-----TTCCATGGGTATTACAGAAATTATAAACAATGAA-T  
TTTTTCT-----ATTTTTTTATATTAAGCTTTTTATTTTCAAACATATGCATGGGTAATTTTTCAA  
CATTGACTCTTGCAAACCTTGTGTTCTAATTTCCCCCCCCCTTCTCCACCCTCTCTCCTAGATGGCAAGTAATCTA  
ATATATGTTAAACATGGTAAAA-TATATGTTAAATCTA-----ATATATGTATACATATTTATGTAATTATCTTGC  
TTTTGCT-----ATTATTTCTACCAGTAATCCAGAGCATCCAAAGTATCAGGTATACTGAACCCATCCACCTTG  
ATTTGGACTCTTCCTACGGTATCTTTAAGAGGTGTGCCAAAAGGAAATTCAGTATGGCCAGCTGTAATAACATTTCCGA  
ATACTCAAATGGGTTCCGTCTTCTGAAGA-TGGGTAAGCCACAATTTATAAACCCCTATTATCCCTG-----TA  
TACAAATATGTATGTAACATATACTTTAACATATTTAACATGTATTAGTCTACCTGCCATCTGGGGGAGGGG---TGGA  
AGGAAGGAGGGGAAAAATTGGAACAAAAGGTCCTGCAATTGTCAATGCTGAAAAATTACCCATGCATATATCTTGTAAT  
AAAAAGCTATAATAATTAAAAACAAAACTAAAA-----ACCTTTATTATCCCATAAGCAAATTCACAACATA  
AAGACCTCTTACCTTATAAT

>Mfa

AMACATCCATCCTTTGGGTCTTTTTTCTATCACGGGTGTGCACATGAATGTGTACCTA-----TTAAAATAAA  
-----CAC--AATTG-----  
-----  
-----

-----TTCCATGGGTATAACAGAAATGATAAACAATGAG-T  
TTTTGTT-----ATTATWTCTTTCTTTATATTAAGCTTTTTTTTTTAAAAACGTACAAATGAAAGCTTTTTTCAA  
CATT-----CCCCCTCAAACCTCCACCCTCTCCCCTAGATAGCAAGTAATCCA  
ATATATATTAACATGGTAAAG--ATATGTTAGATCTAATATATATATATATATATACGTTTATGCAATTATCTTGC  
TTTTGCT-----ATTTCTACCAGTAATCCAGAGCATCCAAAGTACCAAGTATACTGGACCCTTCCACCTTTG  
ATTTGGACTCTTCCTACTGTGTCTTTAGGAGGTGTGTCAAAGGAAATTCAGCATGGCCAGTTGTAATAACATTTCCAA  
ATACTCAAATGGGTTCCAGGCTCCCTAGATATATGGTAAGCCAGAATTTATGAAACCCTATTAT-----  
-----  
-----

-----CTGTAMGC---AGACTCTCAGTGCAGAGAT  
CTCTTAHCATATCTTATAAT

>Pgu

AAGCATCAGTCCTCTGGGTCTTTTTTCTATTACTGATGTCCAAGTGAATGTGGACCTA-----TTAAAATAAA  
-----CACAGATTG-----  
-----  
-----

-----CTCCCTGGGTGTTATAGAAATGATAAACAATTAA-T  
TTTTCT-----  
-----  
-----

-----ATTATTTCTACTAGCATTCTAGAGCATCCAAAGTA-----CCACCTTTG  
ATATGGATCTTCCTACTGTGTCTTTAGGAGGTGTGTCAAAGGGAATTCAGCATGGCCCGTTTTTATAACATTTCCAA  
ATAACCA--GGGTTCCAGATCCCCTAGAA-----AGGGTAAAT-CATAATTCATGAA-----  
-----  
-----

-----ATCCAGTACTCCAGTATGCAGATGCTCAGGATA  
AAGATTTCTTACCTTATAAT

>Nty

-----TTTCTATTACTGGTGTCCATGTGGATGTGGACCTA-----TTAAAATAAA  
-----CACAGATTG-----  
-----  
-----

-----  
-----CTCCATGGGCTGCTACAGACATAATAACAATGAA-T  
TTTTGTT-----  
-----  
-----CTTATTTCTACTC-CAATCCAGAATATCCAAAGTACTATGTATACTGGACCCTTCCACCTTG  
AAATGGACTCTACCTTCTGTGCCCTTAGTAACGTGCCCCAAAATGACATTTTAGCATGGCCA-----AATACCCTA  
A-----GAGGTCCAGGCCCTCTAGAGATA--GTAAGCCAGAATTCATGAAA-----  
-----  
-----ACTCAGTATCCCCAGTAAGTAGATGCTCAGAGTA  
AAGATCCCTTACCTTATAAT  
>Meu  
AAGCATCAGTCCTCTGTGTCTTCTTTCTATTACTAGTGTCCAAATGGATGTGAACCTA-----TTAAAAT-AA  
-----CACAACTTA-----  
-----  
-----CTTCACAGATTGCTACAGAAATGATAACAATGAAAT  
TTTTGCT-----  
-----  
-----ATTATTTCTACTAGTAATTCAGGGCATTCAAAGTACTATGTATACTGGACCCTTCCACCACTG  
AGATGTACTCTTCCCTACAGTGTCTTTAAGATGGGTGCCAAAAGGAAATTCAGCACGGTCAACTGTTGTAACATTCCCAA  
ATAA-----AGGGGC-----TAAAATTAATGAA-----  
-----  
-----ACTCCAGTATCCCCTGTAAGCAGATGCTCAGAGTA  
AAGATGCCTTACCTTATAAT  
>Mdo  
AAGCATCAGTCCTCTGGGTCTTTTTTCTATTACTGCTGTCCAAGTGGATGTGGACCTA-----TTAAAATAAA  
-----CACAAGATTG-----  
-----  
-----TTCCATGGGTTGTCATAGAAAGGATTAACAATAAA-T  
TTTTGCC-----  
-----  
-----ATTATTTCT-----CAATCCAGACCATCCATAGAACCATGTGCCCCAAAACCCTTCCAACCTTG  
ATACAGACTTTCCTAACTATGCCTTTAGGGGCTGTGCCAAAAGGAAATTCAGCATGGCCAACCTGTTATAACATTCTTAA  
ACCCTCAAAGGAGTTCAGGTCCCTTGAGACAGCAAGCCAGAATGCACGAA-----  
-----  
-----ACCCAGGATCTCAAGTAAGCAGATACTCAGAGTA  
AAAGTCACTTACTTTATAGT
