# Supplementary material for: Evolutionary Histories of Transposable Elements in the Genome of the Largest Living Marsupial Carnivore, the Tasmanian Devil
Source: PubMed Central journal article supplement — Mol Biol Evol. 2015 Jan 28;32(5):1268–83. doi: 10.1093/molbev/msv017 (PMC4408412; doi:10.1093/molbev/msv017), 2015-01-28
Supplement: supp_msv017_SupplementarylDataSet2.pdf [file supp_msv017_SupplementarylDataSet2.pdf]

**Supplementary data set 2.** FASTA sequences for the new ERV-1 type element.

**>Type 1a**

TGATGCGGGTGTGGTCCCTTTAAGATTCCCTTTCTTTCTGATTCCCAACCCCTCCTAGTTG  
ATGTAATTATCAATCAAGGACCTTTTGATTACAAATCCTGGTCCCTTTGAATTCCAATA  
GAAGATCCGGGCTGTCCCAGCCCCACCCGGATCTGAGCCAACCTTGGGACTACACCACA  
GGCCCTCTAGCTAAATCTCCATTATAAAAAGGGGCCAAGCTGGGACCCCTCTTTGCAG  
AGGTCCCAAACATGCCAGCCTTACGCCTGGCATGCCAGGACCCTCTGTCCACTGGAACCTC  
TGTGTCCGGTGCCCTTCTTATCTCTACCTTCACCTATTTCCCTTAACTATACTTTAACCTT  
ACTTCCAAACCCATAATAAACCTCTTTTATCAATCTAGCTTTTCGGGCCAATAAATGCT  
TTTATTGGGGACTCTCGCGCGCCACTAGACTTCATTTAACTCCGTATCCTTGCGCCGAAT  
CCAANGGGGTTGCAGGGGAGCTCTATTTGACTCCCTGTACCCCGAACCTGCCACTAGACC  
TCAATTAACCCCTAATTTCAATTTAGGTACCCCATATCTAGACCTCATCA

**> Type 1b**

TGATGCGGGTGTGGTCCCTTTAAGAATTGATTATTCCCTTTCTTTCTGATTCCCAACCCCT  
CCTAGTTGATGCATTATCAATCCAGGACCTTTTGATTACAAATCCTGGTCCCTTTGAAT  
TCCAATAGAAGATCCGGGCTGTCCCAGCCCCACCCGGATCTGAGCCAACCTTGGGACTCC  
ACCCACAGGCCCTCTAGCTAAATCTCTCATTATAAAAAGAGTCAAGCTGGAATCCTCTCT  
TTGCAGAGGTTCCAAACATGCCAGCCTTACGCCTGGCATGCCAGGACCCTCTGTCCACTG  
GAACCCTGTTTCCGGTGCCCTTCTTATCTCTACCTTCACCTATTTCCCTTAACTATACTTTA  
ACCTTACTTCCAAACCCATAATAAACCTCTTTTATCAATCTAGCTTTTCGGGCCAATAA  
ATTCCTTTATTGGGAACTCTCGCGCCGCTNCTAGACCTCATTTAACTCCGTATCCTTGCG  
CCGAATCCAAAGGGGTTGCAGGGGAGCTCTATTTGACTCCCTGTACCCCGAACCTGCCAC  
TAGACCTCAATTAACCCCTAATTTCAATTTAGGTACCCCATATCTAGACCTCATCA

**> Type 2**

TGATGCGGGTGTGGTCCCTTTAAGAATTGATTTATTCCCTTTCTTTCTGATTCCCAACCC  
CTCCTAGCTGATGCATTATCAATCCAGGAAGCTAGGACCTTTGATTACAAATCCTGGTC  
AAAAGCACCCCTTTGAATTCCAATAGAAGATCCGGGCTGTCCCAGCCCCACCCGGATC  
TGAGCCAACCTTGGGCTGTCCCAGCCCCATTCTAATGATCTGCTCAGGTTTCCCAACCC  
ACCAAGCAAACCTCAAGCCCCACTGAAATCCAGCGAGGAGCCAACCTTGGGACTCCACCCA  
CAGGCCCTTTAGCTAAATCTCTCATTATAAAAAGAGCCAAGCTGGAGTCCTCTCTTTGCA  
GAGGTTCCAAACATGCCAGCCTTACGCCTGGCACGCCAGGGACCTCTGTCCACTGGAATC  
CTGTTTCCGGTGCCCTCCTTATCTCTACCTTCACCTATTTCCCTTAACTATACTTTAACCTT  
ACTTCCAAACCCATAATAAACCTCTTTTATCAATCTAGCTTTTCGGGCTGTAAATTCC  
TTTACAGGGGACTCTCGCGCGCTACTAGACCTCATTTAACTCCGTATCCTTGCGCCGAAT  
CCAAAGGGGTTGCAGGGGAGCTCTATTTGACTCCCTGTACCCCGAACCTGCCACTAGACC  
TCAATTAACCCCTAATTTCAATTTAGGTACCCCATATCTAGACCTCATCA
